# Supplementary material for: Testing for non-inferior mortality: a systematic review of non-inferiority margin sizes and trial characteristics
Source: PubMed Central journal article supplement — BMJ Open. 2021 Apr 20;11(4):e044480. doi: 10.1136/bmjopen-2020-044480 (PMC8061825; doi:10.1136/bmjopen-2020-044480), 2021-04-20

**Appendix D: Diagnostic plots for regression models**

**Absolute non-inferiority margins**

Absolute non-inferiority margin

Log-transformed absolute non-inferiority margin

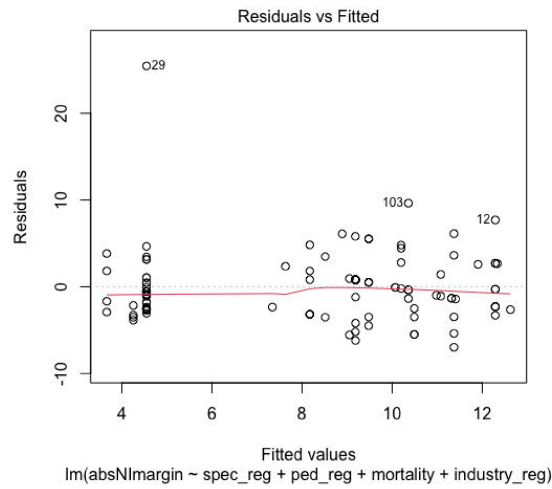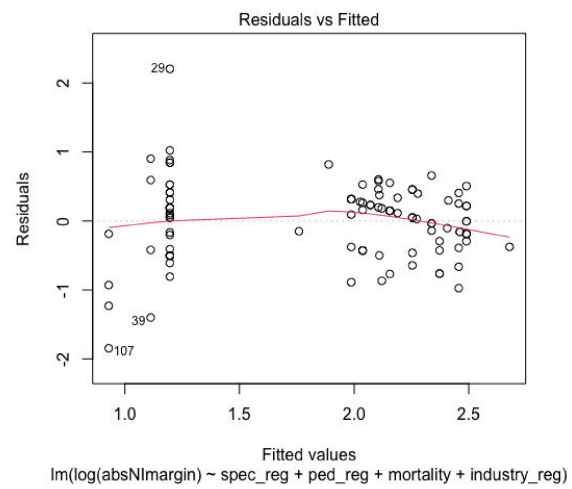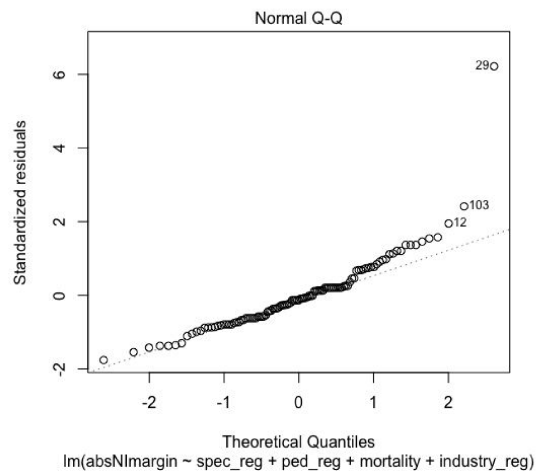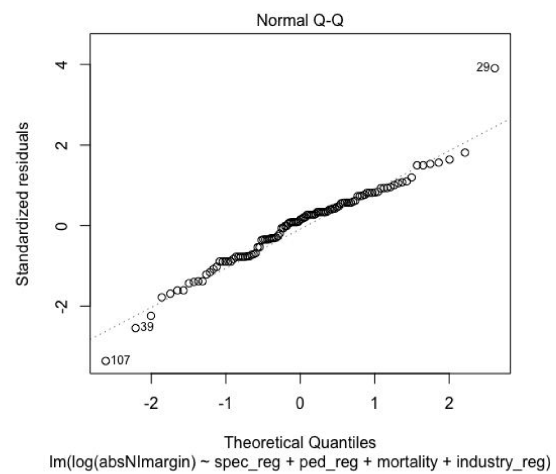

Absolute non-inferiority margin

Log-transformed absolute non-inferiority margin

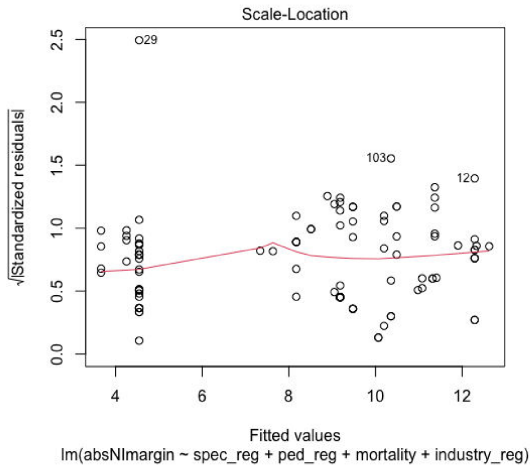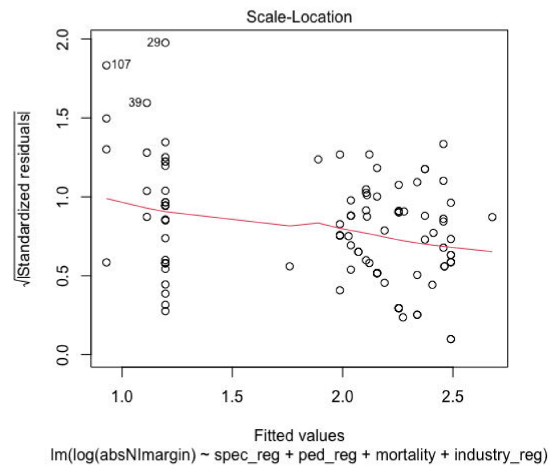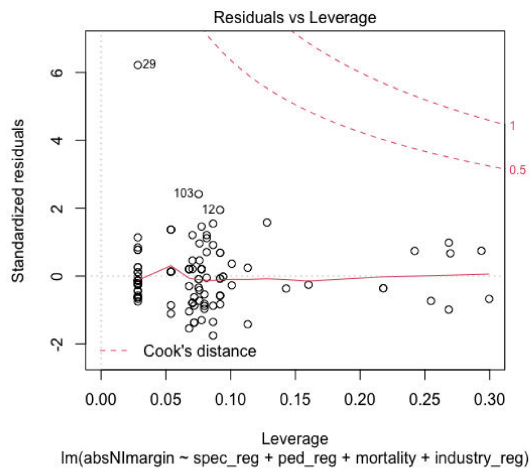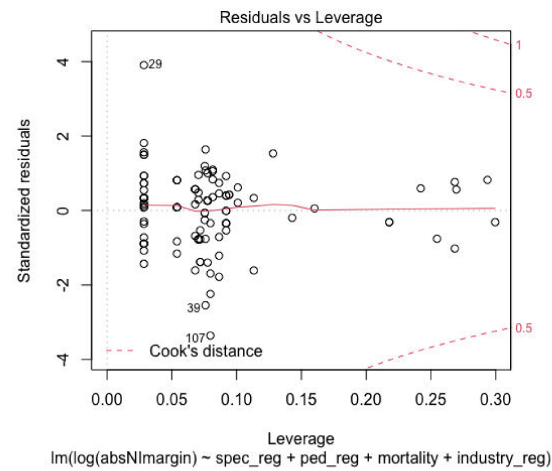

**Relative non-inferiority margins**

Relative non-inferiority margin

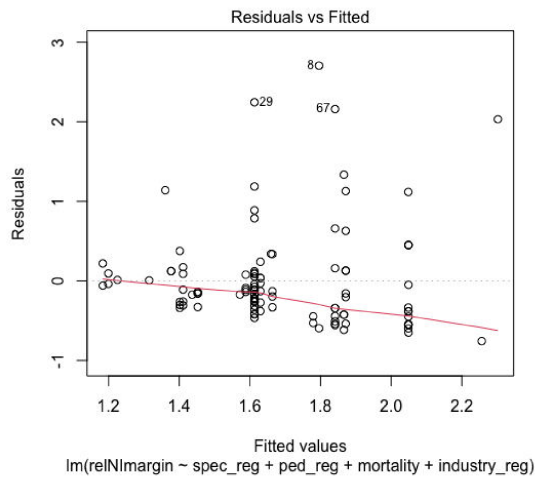

Log-transformed relative non-inferiority margin

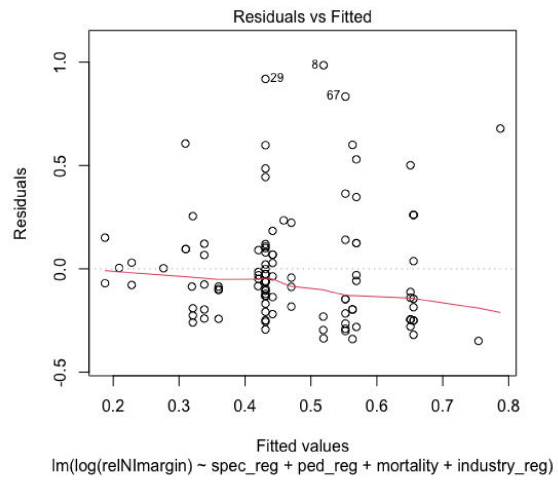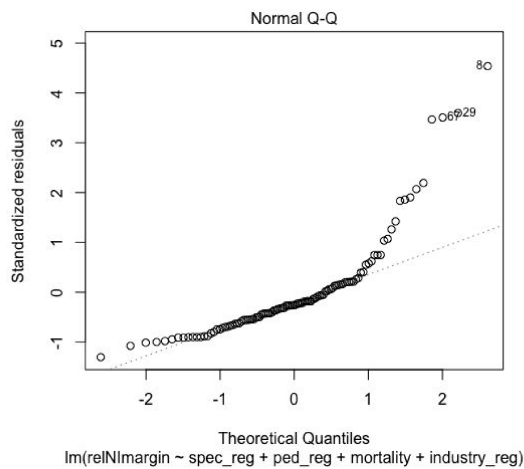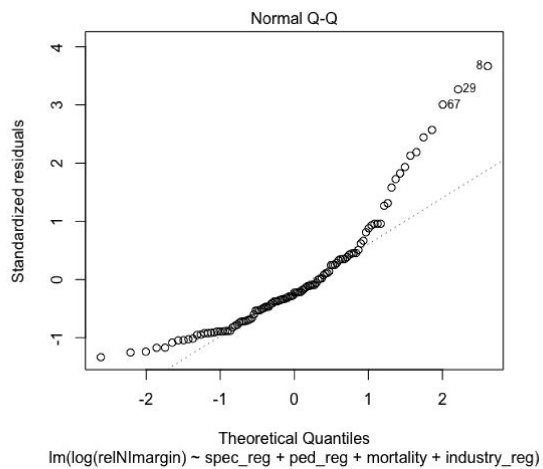

Relative non-inferiority margin

Log-transformed relative non-inferiority margin

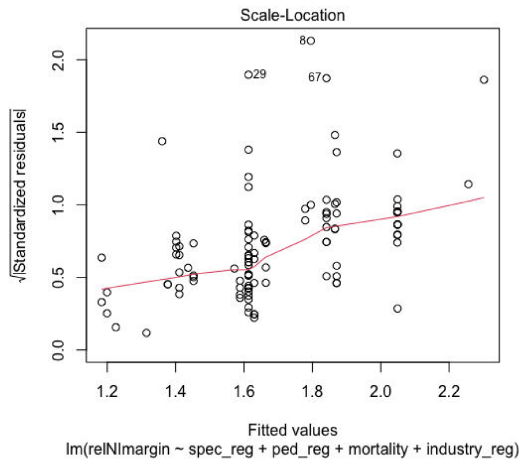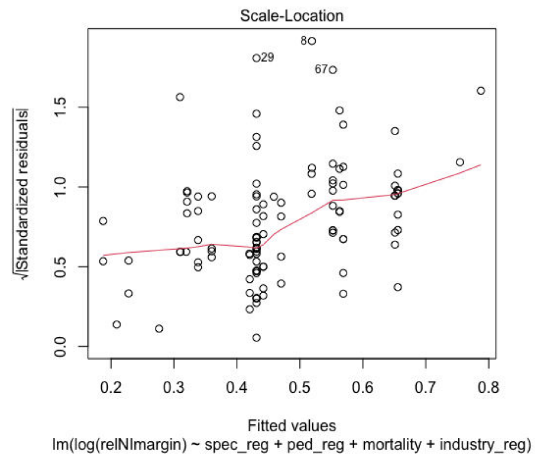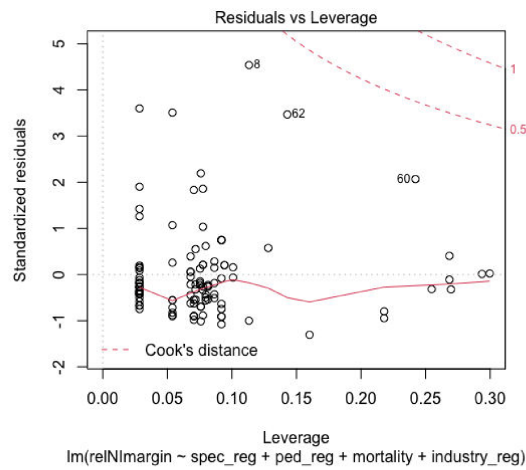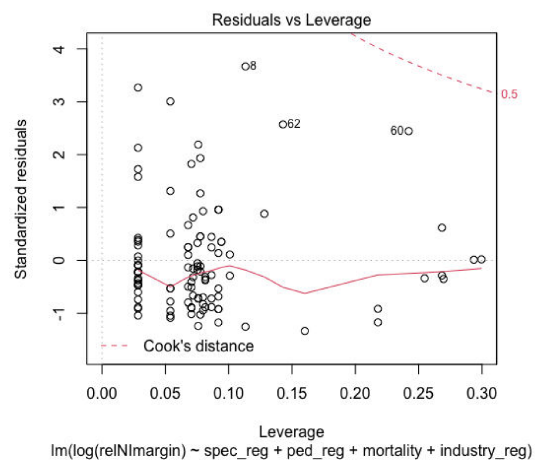

Supplement: bmjopen-2020-044480supp004.pdf [file bmjopen-2020-044480supp004.pdf]
