# Supplementary material for: Testing for non-inferior mortality: a systematic review of non-inferiority margin sizes and trial characteristics
Source: PubMed Central journal article supplement — BMJ Open. 2021 Apr 20;11(4):e044480. doi: 10.1136/bmjopen-2020-044480 (PMC8061825; doi:10.1136/bmjopen-2020-044480), 2021-04-20
Supplement: bmjopen-2020-044480.draft_revisions.pdf [file bmjopen-2020-044480.draft_revisions.pdf]

# BMJ Open

BMJ Open is committed to open peer review. As part of this commitment we make the peer review history of every article we publish publicly available.

When an article is published we post the peer reviewers' comments and the authors' responses online. We also post the versions of the paper that were used during peer review. These are the versions that the peer review comments apply to.

The versions of the paper that follow are the versions that were submitted during the peer review process. They are not the versions of record or the final published versions. They should not be cited or distributed as the published version of this manuscript.

BMJ Open is an open access journal and the full, final, typeset and author-corrected version of record of the manuscript is available on our site with no access controls, subscription charges or pay-per-view fees (<http://bmjopen.bmj.com>).

If you have any questions on BMJ Open's open peer review process please email [info.bmjopen@bmj.com](mailto:info.bmjopen@bmj.com)

# BMJ Open

## Testing for non-inferior mortality: a systematic review of non-inferiority margin sizes and trial characteristics

|                               |                                                                                                                                                                                                                                                                                                                                                                                                                                                                                                                                                                                                                                                                                                                                                                                                                                                                                                                                                                                 |
|-------------------------------|---------------------------------------------------------------------------------------------------------------------------------------------------------------------------------------------------------------------------------------------------------------------------------------------------------------------------------------------------------------------------------------------------------------------------------------------------------------------------------------------------------------------------------------------------------------------------------------------------------------------------------------------------------------------------------------------------------------------------------------------------------------------------------------------------------------------------------------------------------------------------------------------------------------------------------------------------------------------------------|
| Journal:                      | <i>BMJ Open</i>                                                                                                                                                                                                                                                                                                                                                                                                                                                                                                                                                                                                                                                                                                                                                                                                                                                                                                                                                                 |
| Manuscript ID                 | bmjopen-2020-044480                                                                                                                                                                                                                                                                                                                                                                                                                                                                                                                                                                                                                                                                                                                                                                                                                                                                                                                                                             |
| Article Type:                 | Original research                                                                                                                                                                                                                                                                                                                                                                                                                                                                                                                                                                                                                                                                                                                                                                                                                                                                                                                                                               |
| Date Submitted by the Author: | 03-Sep-2020                                                                                                                                                                                                                                                                                                                                                                                                                                                                                                                                                                                                                                                                                                                                                                                                                                                                                                                                                                     |
| Complete List of Authors:     | <p>Pong, Sandra; The Hospital for Sick Children, Department of Pharmacy<br/> Uerner, Martin; University of Toronto, Interdepartmental Division of<br/> Critical Care Medicine; University of Toronto, Institute of Health Policy,<br/> Management and Evaluation<br/> Fowler, Robert; Sunnybrook Health Sciences Centre, Tory Trauma<br/> Program; University of Toronto, Interdepartmental Division of Critical<br/> Care Medicine<br/> Mitsakakis, Nicholas ; University of Toronto, Dalla Lana School of Public<br/> Health<br/> Seto, Winnie; The Hospital for Sick Children, Department of Pharmacy;<br/> University of Toronto, Faculty of Pharmacy<br/> Hutchison, Jamie; The Hospital for Sick Children, Department of Critical<br/> Care Medicine<br/> Science, Michelle; The Hospital for Sick Children, Division of Infectious<br/> Diseases<br/> Daneman, Nick; Sunnybrook Health Sciences Centre, Division of<br/> Infectious Diseases, Department of Medicine</p> |
| Keywords:                     | STATISTICS & RESEARCH METHODS, EPIDEMIOLOGY, Clinical trials < THERAPEUTICS                                                                                                                                                                                                                                                                                                                                                                                                                                                                                                                                                                                                                                                                                                                                                                                                                                                                                                     |
|                               |                                                                                                                                                                                                                                                                                                                                                                                                                                                                                                                                                                                                                                                                                                                                                                                                                                                                                                                                                                                 |

SCHOLARONE™  
Manuscripts

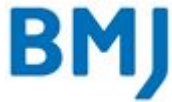

I, the Submitting Author has the right to grant and does grant on behalf of all authors of the Work (as defined in the below author licence), an exclusive licence and/or a non-exclusive licence for contributions from authors who are: i) UK Crown employees; ii) where BMJ has agreed a CC-BY licence shall apply, and/or iii) in accordance with the terms applicable for US Federal Government officers or employees acting as part of their official duties; on a worldwide, perpetual, irrevocable, royalty-free basis to BMJ Publishing Group Ltd ("BMJ") its licensees and where the relevant Journal is co-owned by BMJ to the co-owners of the Journal, to publish the Work in this journal and any other BMJ products and to exploit all rights, as set out in our [licence](#).

The Submitting Author accepts and understands that any supply made under these terms is made by BMJ to the Submitting Author unless you are acting as an employee on behalf of your employer or a postgraduate student of an affiliated institution which is paying any applicable article publishing charge ("APC") for Open Access articles. Where the Submitting Author wishes to make the Work available on an Open Access basis (and intends to pay the relevant APC), the terms of reuse of such Open Access shall be governed by a Creative Commons licence – details of these licences and which [Creative Commons](#) licence will apply to this Work are set out in our licence referred to above.

Other than as permitted in any relevant BMJ Author's Self Archiving Policies, I confirm this Work has not been accepted for publication elsewhere, is not being considered for publication elsewhere and does not duplicate material already published. I confirm all authors consent to publication of this Work and authorise the granting of this licence.

1  
2  
3  
4  
5  
6  
7  
8 **Testing for non-inferior mortality: a systematic review of non-inferiority margin sizes and trial**  
9 **characteristics**  
10  
11  
12  
13  
14  
15  
16  
17

18 Sandra Pong (0000-0003-2963-9601) *clinical pharmacist*<sup>1</sup>, Martin Urner *clinical and research*  
19 *fellow*<sup>2-3</sup>, Robert A Fowler *clinician scientist*<sup>2,4</sup>, Nicholas Mitsakakis *biostatistician*<sup>5</sup>, Winnie Seto  
20 *clinical pharmacist*<sup>1</sup>, James S Hutchison *senior scientist*<sup>6</sup>, Michelle Science *infectious diseases*  
21 *consultant*<sup>7</sup>, Nick Daneman *clinician scientist*<sup>8</sup>  
22  
23  
24  
25  
26  
27  
28

29 <sup>1</sup>Department of Pharmacy, The Hospital for Sick Children, Toronto, Ontario, Canada

30 <sup>2</sup>Interdepartmental Division of Critical Care Medicine, University of Toronto, Toronto, Ontario  
31 Canada

32 <sup>3</sup>Institute of Health Policy, Management and Evaluation, University of Toronto, Toronto,  
33 Ontario, Canada

34 <sup>4</sup>Tory Trauma Program, Sunnybrook Health Sciences Centre, Toronto, Ontario, Canada

35 <sup>5</sup>Dalla Lana School of Public Health, University of Toronto, Toronto, Ontario, Canada

36 <sup>6</sup>Department of Critical Care Medicine, The Hospital for Sick Children, Toronto, Ontario

37 <sup>7</sup>Division of Infectious Diseases, The Hospital for Sick Children, Toronto, Ontario, Canada

38 <sup>8</sup>Division of Infectious Diseases, Sunnybrook Health Sciences Centre, Toronto, Ontario, Canada  
39  
40  
41  
42  
43  
44  
45  
46

47 **Corresponding author:**

48 Sandra Pong

49 The Hospital for Sick Children

50 555 University Avenue

51 Toronto, Ontario, M5G 1X8

52 Canada

53 sandra.pong@sickkids.ca  
54  
55  
56  
57  
58  
59  
60

**ABSTRACT****OBJECTIVE**

To describe the size and variability of non-inferiority margins used in non-inferiority trials of medications with primary outcomes involving mortality, and to examine the association between trial characteristics and non-inferiority margin size.

**DESIGN**

Systematic review

**DATA SOURCES**

Medline, Medline In Process, Medline Epub Ahead of Print and Embase Classic+Embase databases from January 1989 to December 2019.

**ELIGIBILITY CRITERIA**

Prospective non-inferiority randomized controlled trials comparing pharmacological therapies, with primary analyses for non-inferiority and primary outcomes involving mortality alone or as part of a composite outcome. Trials had to pre-specify non-inferiority margins as absolute risk differences or relative to risks of outcome and provide a baseline risk of primary outcome in the control intervention.

## RESULTS

3992 records were screened, 195 articles were selected for full text review and 111 articles were included for analyses. 82% of trials were conducted in thrombosis, infectious diseases or oncology. Mortality was the sole primary outcome in 23 (21%) trials, and part of a composite primary outcome in 88 (79%) trials. The overall median non-inferiority margin was an absolute risk difference of 9% (IQR 4.2-10%). When non-inferiority margins were expressed relative to the baseline risk of primary outcome in control groups, the median relative non-inferiority margin was 1.5 (IQR 1.3-1.7). In multivariable regression analyses examining the association between trial characteristics (medical specialty, inclusion of pediatric patients, mortality as a sole or part of a composite primary outcome, presence of industry funding) and non-inferiority margin size, only medical specialty was significantly associated with absolute non-inferiority margin size.

## CONCLUSION

Absolute and relative non-inferiority margins used in published trials comparing medications are large, allowing conclusions of non-inferiority in the context of large differences in mortality. Accepting the potential for large increases in outcomes involving mortality while declaring non-inferiority is a challenging methodological issue in the conduct of non-inferiority trials.

### STRENGTHS AND LIMITATIONS OF THIS STUDY

- There have been no previous reviews or studies that describe the size and variability of non-inferiority margins used in trials with high-stake outcomes such as mortality.
- Our comprehensive and sensitive search for non-inferiority trials spanned a 30-year period to ensure that virtually all non-inferiority trials with primary outcome involving mortality would be captured.
- We were reliant on authors to provide the values of non-inferiority margins and estimated risks of outcomes in their sample size calculations.

**WORD COUNT:** 2840 words

## INTRODUCTION

The premise of non-inferiority trials is to demonstrate that a new treatment is no worse than a standard intervention by a pre-specified non-inferiority margin chosen by researchers.<sup>1</sup> Yet proving that drugs, devices and other medical treatments are no worse than a comparison is challenging.<sup>2-3</sup> The acceptable width of the margin of non-inferiority is a controversial aspect in the design of these studies. It is a determinant of the required sample size of a trial and has a large influence on the interpretation of “not unacceptably worse.” Wide margins allow smaller sample sizes to conclude non-inferiority, but if a margin is too wide, a conclusion of non-inferiority could be clinically irrelevant or ethically inappropriate. This would be especially disturbing if the implications of accepting a truly inadequate treatment as non-inferior involves death as an outcome.<sup>2</sup>

Design and analytical challenges, and the deficits in adherence to reporting standards of non-inferiority trials have been described in multiple studies and reviews.<sup>4-12</sup> Much attention has been focused on how non-inferiority margins are selected, whether they are justified<sup>10,13</sup> and how they affect the validity of trial results and conclusions.<sup>11-12</sup> However, prior research has not described the size and variability of non-inferiority margins used in trials with high-stake outcomes such as mortality, nor examined whether certain trial characteristics such as the type of patients, medical conditions studied, choice of outcomes and baseline risks of outcomes are associated with the selection of smaller or larger non-inferiority margins. There is a need to establish standards for the design and analyses of non-inferiority trials to promote consistent quality of these trials. An important step, therefore, is to identify the range of non-inferiority



1  
2  
3 margins used in non-inferiority trials and determine whether trial characteristics influence the  
4  
5 selection of margin sizes.  
6  
7  
8  
9

10 In this systematic review, our primary objective was to describe the size and variability of non-  
11  
12 inferiority margins used in non-inferiority trials of medications with primary outcomes involving  
13  
14 mortality. Our secondary objective was to assess whether selected trial characteristics were  
15  
16 associated with non-inferiority margin size.  
17  
18  
19  
20  
21  
22

## 23 **METHODS**

24  
25 We followed the Preferred Reporting Items for Systematic Reviews and Meta-Analysis (PRISMA)  
26  
27 statement to report this systematic review.<sup>14</sup>  
28  
29  
30  
31  
32

### 33 **Search strategy**

34  
35 We searched Medline, Medline In Process, Medline Epub Ahead of Print and Embase  
36  
37 Classic+Embase databases (OvidSP) (search performed February 8, 2019, updated December  
38  
39 12, 2019) to identify randomized controlled non-inferiority trials published between 1989 and  
40  
41 2019. Our decision to start our search from 1989 was informed by a review that described the  
42  
43 changes in publication rate of non-inferiority trials between 1989 and 2009, and found 583  
44  
45 published non-inferiority trials but only one that was published prior to 1998.<sup>3</sup>  
46  
47  
48  
49  
50  
51

52 Subject heading and text-word terms for “equivalence trials or non-inferiority or inferiority  
53  
54 studies” and mortality were used with the Cochrane sensitive trials filter. Of note, “non-  
55  
56  
57  
58  
59  
60

1  
2  
3 inferiority trial” and “inferiority trial” terms are indexed together with “equivalence trial” in  
4  
5 Ovid and the term “equivalence trial” was only introduced as a Medical Subject Heading  
6  
7 (MeSH) in 2018. Results were restricted to the English language and trials performed in  
8  
9 humans. The complete electronic database search strategies are presented in Appendix A. To  
10  
11 ensure that all relevant trials were captured, the electronic database search was supplemented  
12  
13 with a manual search by scanning the reference lists of included trials and relevant reviews, in  
14  
15 addition to a search of the reviewers’ personal files.  
16  
17  
18  
19  
20  
21  
22

### 23 **Eligibility criteria**

24  
25 We included all prospective non-inferiority randomized controlled trials involving human  
26  
27 subjects that compared pharmacological therapies, where the primary analysis was for non-  
28  
29 inferiority and the primary outcome included mortality, either alone or as part of a composite  
30  
31 outcome. All trials had to pre-specify a non-inferiority margin (as an absolute risk difference or  
32  
33 relative to the risk of outcome) and provide a baseline estimate of the risk of primary outcome  
34  
35 in the control intervention in a sample size calculation. In cases where these variables changed  
36  
37 during the course of the trial, the initial values used in the original trial design were used for  
38  
39 analyses. No distinction between pediatric or adult populations was made.  
40  
41  
42  
43  
44  
45  
46

47 We excluded trials that did not provide a sample size calculation based on a pre-specified non-  
48  
49 inferiority margin and estimated baseline risk of outcome. To enable comparisons of non-  
50  
51 inferiority margins across different trials, we also excluded trials that used non-inferiority  
52  
53 margins expressed as incidence rate ratios, odds ratios or hazard ratios because incidence and  
54  
55  
56  
57  
58  
59  
60

1  
2  
3 hazard ratios are relative to an outcome event rate that changes with time and with odds  
4  
5 ratios, the baseline risk of outcome in the control group cannot be determined to convert the  
6  
7 ratio to a relative non-inferiority margin unless it was explicitly stated by the authors. We also  
8  
9 excluded articles that described sub-studies, post-hoc analyses or follow-up studies of  
10  
11 randomized trials.  
12  
13  
14  
15  
16  
17

### 18 **Selection of trials**

19  
20 One review author (SP) screened titles and abstracts of all retrieved records for obvious  
21  
22 exclusions. Two review authors (SP and MU) independently assessed potentially eligible trials  
23  
24 based on full text review. Disagreements were resolved by arbitration by a third review author  
25  
26 (ND).  
27  
28  
29  
30  
31

### 32 **Data collection**

33  
34 One review author (SP) extracted data from the included trials using a standardized form to  
35  
36 collect information on: year of publication, medical specialty area, inclusion of pediatric  
37  
38 patients (age less than 18 years), mortality as a single or part of a composite primary outcome,  
39  
40 estimated risk of primary outcome in the control group, non-inferiority margin, industry  
41  
42 funding (disclosures in the publication about funding or sponsorship by a pharmaceutical  
43  
44 company) and conclusion about non-inferiority.  
45  
46  
47  
48  
49  
50  
51  
52  
53  
54  
55  
56  
57  
58  
59  
60

## Statistical analyses

Trial characteristics were summarized using counts and proportions. To enable comparisons of non-inferiority margins across different trials as either absolute or relative margins, we converted non-inferiority margins expressed as absolute risk differences into relative non-inferiority margins relative to the estimated risk of outcome for each trial's control group. The reverse was also done to convert relative non-inferiority margins into equivalent margins in terms of absolute differences. Graphical plots were used to explore an association between absolute non-inferiority margins and the estimated risks of outcome in control groups, and to describe the distribution of absolute and relative non-inferiority margins used in the trials.

For the primary objective, descriptive statistics (median, interquartile range (IQR), range) of absolute and relative non-inferiority margins were summarized for the overall cohort of trials included in the review. We also stratified these by trial characteristics: medical specialty, inclusion of pediatric patients, mortality as a single or composite outcome, industry funding and publication date pre- or post-2010 release of the first FDA draft guidance statement about non-inferiority trials. To investigate whether there was a difference in non-inferiority margins (absolute and relative) according to trial characteristics, we compared non-inferiority margins using Wilcoxon rank sum test (for 2 groups) and Kruskal-Wallis rank sum test (for >2 groups).

For the secondary objective, we used multivariable linear regression to examine the association between pre-specified trial characteristics (medical specialty, inclusion of pediatric patients, mortality as single or composite outcome and industry funding) as independent variables and

1  
2  
3 non-inferiority margin size as the outcome variable. All comparisons were two-sided and  
4  
5  $p < 0.05$  was considered statistically significant. Statistical analyses were conducted using R  
6  
7  
8 version 4.0.2.  
9

## 10 11 12 13 **RESULTS**

14  
15 We screened 3992 records for relevance using titles and abstracts and selected 195 articles for  
16  
17 full text review. After independent assessment of the full text articles and discussion among  
18  
19 reviewers, a total of 111 articles met eligibility criteria to be included for analyses (Figure 1).  
20  
21  
22 The agreement between reviewers was excellent (kappa statistic = 0.86).  
23  
24  
25  
26  
27

28 <<Figure 1: PRISMA flow diagram<sup>14</sup>>>  
29  
30  
31

### 32 **Trial characteristics**

33  
34 Among the 111 trials included, 91 (82%) were trials conducted in thrombosis, infectious  
35  
36 diseases or oncology. Mortality was the sole primary outcome in 23 (21%) trials, and part of a  
37  
38 composite primary outcome in 88 (79%) trials. Over half of the trials disclosed receiving some  
39  
40 form of industry funding. Of the included trials, 82 (74%) concluded non-inferiority, 21 (19%)  
41  
42 did not conclude non-inferiority and the remaining 8 (7%) were either inconclusive, stopped  
43  
44 early or unclear about their conclusions. The non-inferiority margin was expressed as an  
45  
46 absolute risk difference in 109 (98%) trials.  
47  
48  
49  
50  
51  
52  
53  
54  
55  
56  
57  
58  
59  
60

### **Association between absolute non-inferiority margins and estimated baseline risks of outcome (involving mortality) in control groups**

Figure 2 is a scatterplot between absolute non-inferiority margins and estimated baseline risks of outcome (i.e. mortality alone or a composite outcome that included mortality) in the control group for the trials included in this review. A Spearman's correlation shows a moderate, positive monotonic correlation ( $r_s = 0.6$ ,  $p < 0.05$ ) between the two. Variability in the absolute non-inferiority margins can be seen at both high and low estimates of baseline risks of outcome.

<<Figure 2: Association between absolute non-inferiority margins and estimated risks of outcome in control group>>

### **Distribution of non-inferiority margins for outcomes involving mortality**

The distribution of absolute non-inferiority margins subdivided by medical specialty is shown in Figure 3A. There was a wide range of non-inferiority margins for trial outcomes that involve mortality (0.4 to 30%), with a skewed distribution and distinct peaks observed at 5, 10 and 15%. Thrombosis trials used smaller non-inferiority margins more commonly than did other trials.

Figure 3B illustrates a similarly skewed distribution of relative non-inferiority margins subdivided by medical specialty. The most common relative non-inferiority margin observed was 1.5. Most relative non-inferiority margins clustered in the range of 1.3 to 1.7, however there were also many relative non-inferiority margins that were greater than 2.

<<Figure 3: Distribution of absolute and relative non-inferiority margins for primary outcomes involving mortality>>

### Characteristics of non-inferiority margins

The characteristics of the non-inferiority margins in the trials included in this review are summarized in Table 1. The median absolute non-inferiority margin was 9% (IQR 4.2-10%) and the median relative non-inferiority margin was 1.5 (IQR 1.3-1.7).

**Table 1: Summary of characteristics of non-inferiority trials included**

|                                                                   |           | Absolute non-inferiority margin (%) for outcomes involving mortality |         |         | Relative non-inferiority margin for outcomes involving mortality |         |         |
|-------------------------------------------------------------------|-----------|----------------------------------------------------------------------|---------|---------|------------------------------------------------------------------|---------|---------|
|                                                                   | n (%)     | Median (IQR <sup>a</sup> )                                           | Range   | p-value | Median (IQR <sup>a</sup> )                                       | Range   | p-value |
| <b>Overall</b>                                                    | 111       | 9 (4.2-10)                                                           | 0.4-30  | --      | 1.5 (1.3-1.7)                                                    | 1.1-4.5 | --      |
| <b>Medical specialty</b>                                          |           |                                                                      |         |         |                                                                  |         |         |
| Thrombosis                                                        | 37 (33.3) | 3.6 (2-5)                                                            | 0.4-30  | <0.001  | 1.4 (1.3-1.7)                                                    | 1.1-3.9 | 0.02    |
| Infectious diseases                                               | 31 (27.9) | 10 (5.5-10)                                                          | 3-20    |         |                                                                  |         |         |
| Oncology                                                          | 23 (20.7) | 10 (7.5-13.8)                                                        | 4-17.5  |         |                                                                  |         |         |
| Transplant                                                        | 11 (9.9)  | 10 (10-13.5)                                                         | 9-20    |         |                                                                  |         |         |
| Cardiology                                                        | 4 (3.6)   | 7.5 (5-10.5)                                                         | 5-12    |         |                                                                  |         |         |
| Gastroenterology                                                  | 2 (1.8)   | 12.5 (11.3-13.8)                                                     | 10-15   |         |                                                                  |         |         |
| Respirology                                                       | 2 (1.8)   | 12.3 (11.1-13.4)                                                     | 10-14.5 |         |                                                                  |         |         |
| Anesthesia                                                        | 1 (0.9)   | 10 (10-10)                                                           | 10-10   |         |                                                                  |         |         |
| <b>Pediatric patients included</b>                                |           |                                                                      |         |         |                                                                  |         |         |
| Yes                                                               | 21 (18.9) | 10 (5-10)                                                            | 3.5-15  | 0.11    | 1.7 (1.5-2)                                                      | 1.2-4.5 | 0.10    |
| No                                                                | 85 (76.6) | 8 (4-10)                                                             | 0.7-30  |         |                                                                  |         |         |
| Unclear/not explicitly stated                                     | 5 (4.5)   | 5.5 (2.2-5.6)                                                        | 0.4-10  |         |                                                                  |         |         |
| <b>Mortality outcome</b>                                          |           |                                                                      |         |         |                                                                  |         |         |
| Single                                                            | 23 (20.7) | 10 (5-12.8)                                                          | 0.4-15  | 0.24    | 1.3 (1.2-1.6)                                                    | 1.1-2.5 | 0.03    |
| Composite                                                         | 88 (79.3) | 7.8 (4-10)                                                           | 0.8-30  |         |                                                                  |         |         |
| <b>Industry funding</b>                                           |           |                                                                      |         |         |                                                                  |         |         |
| Yes                                                               | 61 (55)   | 5.6 (3.5-10)                                                         | 0.4-30  | 0.01    | 1.5 (1.3-1.7)                                                    | 1.1-4.5 | 0.41    |
| No                                                                | 42 (37.8) | 10 (5-10)                                                            | 0.8-15  |         |                                                                  |         |         |
| Unclear/not explicitly stated                                     | 8 (7.2)   | 10 (10-13.4)                                                         | 5.5-15  |         |                                                                  |         |         |
| <b>Pre- and post-2010 release of draft FDA guidance statement</b> |           |                                                                      |         |         |                                                                  |         |         |
| Pre-2010                                                          | 35 (31.5) | 7.9 (3.8-10)                                                         | 0.4-15  | 0.24    | 1.4 (1.2-1.7)                                                    | 1.1-4   | 0.02    |
| Post-2010                                                         | 76 (68.5) | 9.5 (4.5-10)                                                         | 0.8-30  |         |                                                                  |         |         |

<sup>a</sup>Interquartile range

The differences in both absolute and relative non-inferiority margins used among medical specialties were significant. Thrombosis trials had the lowest median absolute non-inferiority

1  
2  
3 margin of 3.5%. Although there was a wide range of absolute and relative non-inferiority  
4  
5 margins used across trials, the absolute non-inferiority margins of at least one trial in every  
6  
7 specialty was 10% or greater.  
8  
9

10  
11  
12  
13 Trials with mortality as part of a composite primary outcome had significantly higher relative  
14  
15 non-inferiority margins compared to those with mortality as a single primary outcome. In  
16  
17 contrast, when the non-inferiority margin was expressed as an absolute risk difference, there  
18  
19 was no significant difference in the margins between type of mortality outcome. Industry-  
20  
21 funded trials had a significantly lower median absolute non-inferiority margin compared to  
22  
23 those without industry funding.  
24  
25  
26  
27  
28  
29

30  
31 In this review, 35 (32%) trials were published before 2010 when the first draft FDA guidance  
32  
33 statement about non-inferiority trials was published. The relative non-inferiority margin sizes  
34  
35 were significantly larger in trials that were published after 2010. A similar trend was seen with  
36  
37 the absolute non-inferiority margin sizes, but the difference was not statistically significant.  
38  
39  
40  
41

#### 42 **Association between trial characteristics and non-inferiority margin size**

43  
44  
45 Table 2 shows the  $\beta$  coefficients with 95% confidence intervals (CI) from multivariable linear  
46  
47 regression analyses examining the association between trial characteristics (independent  
48  
49 variables) and absolute non-inferiority margin size (outcome variable). Table 3 presents the  
50  
51 regression analyses with relative non-inferiority margin size. Of the trial characteristics  
52  
53 included in multivariable analyses, only medical specialty was significantly associated with the  
54  
55  
56  
57  
58  
59  
60



size of absolute non-inferiority margin—specifically, thrombosis trials had significantly smaller absolute non-inferiority margins compared to trials in infectious diseases (reference group). In contrast, there were no statistically significant relationships observed in multivariable analyses between trial characteristics and relative non-inferiority margin size.

**Table 2: Absolute non-inferiority margin regression analyses**

| Predictor                | Adjusted $\beta$ coefficient* | 95% CI         | p-value |
|--------------------------|-------------------------------|----------------|---------|
| <b>Specialty</b>         |                               |                |         |
| Oncology                 | 1.01                          | -1.24 to 3.26  | 0.38    |
| Cardiovascular           | -1.85                         | -6.24 to 2.55  | 0.41    |
| Thrombosis               | -5.81                         | -8.26 to -3.37 | <0.001  |
| Transplant               | 1.93                          | -1.28 to 5.14  | 0.24    |
| Other <sup>#</sup>       | 3.15                          | -0.86 to 7.15  | 0.13    |
| Infectious diseases      | 1 (reference)                 | --             | --      |
| <b>Pediatrics</b>        |                               |                |         |
| Yes                      | -1.31                         | -3.62 to 1.01  | 0.27    |
| No                       | 1 (reference)                 | --             | --      |
| <b>Mortality outcome</b> |                               |                |         |
| Single                   | -0.29                         | -2.36 to 1.78  | 0.78    |
| Composite                | 1 (reference)                 | --             | --      |
| <b>Industry funding</b>  |                               |                |         |
| Yes                      | 0.88                          | -1.11 to 2.87  | 0.39    |
| No                       | 1 (reference)                 | --             | --      |

\*Omnibus F-test: 6.75 (8, 102),  $p < 0.001$

<sup>#</sup>Due to low number of trials, "Other" category combines trials in anesthesia, gastroenterology and respirology

**Table 3: Relative non-inferiority margin regression analyses**

| Predictor                | Adjusted $\beta$ coefficient* | 95% CI        | p-value |
|--------------------------|-------------------------------|---------------|---------|
| <b>Specialty</b>         |                               |               |         |
| Oncology                 | -0.18                         | -0.52 to 0.16 | 0.31    |
| Cardiovascular           | -0.40                         | -1.07 to 0.26 | 0.24    |
| Thrombosis               | 0.02                          | -0.35 to 0.40 | 0.90    |
| Transplant               | 0.46                          | -0.03 to 0.95 | 0.07    |
| Other <sup>#</sup>       | -0.27                         | -0.88 to 0.34 | 0.39    |
| Infectious diseases      | 1 (reference)                 | --            | --      |
| <b>Pediatrics</b>        |                               |               |         |
| Yes                      | 0.21                          | -0.15 to 0.56 | 0.25    |
| No                       | 1 (reference)                 | --            | --      |
| <b>Mortality outcome</b> |                               |               |         |
| Single                   | -0.21                         | -0.53 to 0.10 | 0.19    |
| Composite                | 1 (reference)                 | --            | --      |
| <b>Industry funding</b>  |                               |               |         |
| Yes                      | -0.25                         | -0.56 to 0.05 | 0.11    |
| No                       | 1 (reference)                 | --            | --      |

\*Omnibus F-test: 1.96 (8, 102), p=0.06

<sup>#</sup>Due to low number of trials, "Other" category combines trials in anesthesia, gastroenterology and respirology

## DISCUSSION

We conducted a systematic review of 111 non-inferiority trials that compared pharmacological therapies where mortality was included in the primary outcome. We found that the majority of non-inferiority trials focused on thrombosis, infectious diseases and oncology. There was a wide range of non-inferiority margins used in these trials, irrespective of whether they were expressed as a measure of absolute effect or when converted to a relative effect. Our results showed that in the design of at least half of the non-inferiority trials included in this review, all of which included mortality as part of their primary outcome, a "new" drug therapy could have an absolute increase of 9% or relative increase of 50% in mortality outcomes compared to controls and still be accepted as non-inferior. Accepting the potential for this increase in

1  
2  
3 mortality while declaring non-inferiority is a challenging methodological issue in the conduct of  
4  
5 non-inferiority trials.  
6  
7  
8  
9

10 In our review, we also found that non-inferiority margins were more commonly expressed in  
11  
12 terms of absolute risk differences than in relative terms. Whether to present absolute or  
13  
14 relative non-inferiority margins is a source of debate in the design of non-inferiority trials.<sup>15</sup>  
15  
16

17 There is no clear consensus on the selection of the most appropriate effect measure but it has  
18  
19 been demonstrated that different ways of expressing effect measures could result in different  
20  
21 conclusions within the same non-inferiority trial.<sup>15-17</sup> Since a relative non-inferiority margin  
22  
23 accounts for the estimated baseline risk of outcome, it would be a more conservative choice  
24  
25 over an absolute margin to conclude non-inferiority should the event rate in the control group  
26  
27 be lower than expected.  
28  
29  
30  
31  
32  
33  
34

35 We detected significant variations in absolute and relative non-inferiority margin size according  
36  
37 to medical specialty which could be partially explained by differences in acuity of diseases,  
38  
39 patient age and life expectancy.<sup>18</sup> We also found that industry-funded trials had significantly  
40  
41 lower median absolute non-inferiority margins compared to those without industry funding,  
42  
43 presumably related to greater financial resources and higher capacity to support larger trials  
44  
45 that are necessary when smaller non-inferiority margins are used.  
46  
47  
48  
49  
50  
51

52 When we compared non-inferiority margin size between trials published before and after the  
53  
54 release of the 2010 draft FDA guidance document on non-inferiority studies, we found that the  
55  
56  
57  
58  
59  
60

1  
2  
3 median non-inferiority margin in trials published after 2010 was increased rather than  
4  
5 decreased. Perhaps future guidelines could generate reductions in non-inferiority margins used  
6  
7 for randomized controlled trials involving mortality, if they recommend margins lower, rather  
8  
9 than higher than the current median (<9% absolute mortality, <1.5 times relative mortality).  
10  
11  
12  
13  
14

15 There is currently limited research in the pre-defined determinants of the size of non-inferiority  
16  
17 margins used in non-inferiority trials. Gayet-Ageron et al. conducted a survey among trialists to  
18  
19 assess the association of pre-defined trial factors and non-inferiority margins. They found that  
20  
21 lower non-inferiority margins were associated with mortality as a primary outcome, low  
22  
23 baseline risk and lower costs of new treatments. In contrast, population age group and  
24  
25 difficulties with patient recruitment did not appear to affect the choice of margin.<sup>19</sup> Because of  
26  
27 the nature of a survey study, these results were based on self-report by respondents and were  
28  
29 not necessarily reflective of actual practice when non-inferiority trials are designed and  
30  
31 conducted.  
32  
33  
34  
35  
36  
37  
38  
39

40 In our review of published non-inferiority trials of drug therapies that included mortality as part  
41  
42 of their primary outcome, we examined for an association between non-inferiority margin size  
43  
44 and medical specialty, inclusion of pediatric patients, mortality as a single or composite  
45  
46 outcome and presence of industry funding. The only significant association found was between  
47  
48 absolute non-inferiority margins and medical specialty, specifically with thrombosis trials which  
49  
50 we had already shown to have the lowest median absolute non-inferiority margin compared to  
51  
52  
53  
54  
55  
56  
57  
58  
59  
60

1  
2  
3 other trials. In contrast, when non-inferiority margins were expressed in relative terms, no  
4  
5 significant associations could be found, even with thrombosis trials.  
6  
7  
8  
9

10 Similar to Gayet-Ageron et al.'s<sup>19</sup> results, we found a significant correlation between the size  
11  
12 of absolute non-inferiority margins and estimated baseline risks of outcomes in the control  
13  
14 group. While this association was moderate ( $r_s=0.6$ ), it suggests that larger absolute non-  
15  
16 inferiority margins are used when estimated risks of outcome occurring in control groups are  
17  
18 higher. As can be seen in Figure 2, this relationship appears most evident for baseline outcome  
19  
20 risks up to approximately 20%, beyond which larger absolute non-inferiority margins are no  
21  
22 longer associated with higher baseline risk of outcome.  
23  
24  
25  
26  
27  
28  
29

30 A strength of our review is the comprehensive and sensitive search for non-inferiority trials  
31  
32 which spanned a 30-year period to ensure that virtually all non-inferiority trials with a primary  
33  
34 outcome involving mortality would be captured. There were no limits placed on the type of  
35  
36 medical specialty or patient population as long as a trial compared mortality between  
37  
38 pharmacological therapies. However, we relied on authors to provide the values of non-  
39  
40 inferiority margins and estimated risks of outcome in their sample size calculations within the  
41  
42 publication or in their supplementary materials. The accuracy of reporting these variables was  
43  
44 taken at face value. To enable standardized comparisons of absolute and relative non-  
45  
46 inferiority margins to be made consistently across all trials included in the review, we omitted  
47  
48 non-inferiority trials that used hazard ratios, odds ratios and event rate measures that either  
49  
50  
51  
52  
53  
54  
55  
56  
57  
58  
59  
60

1  
2  
3 changed with time or would not allow us to determine the estimated risk of outcome in the  
4  
5 control group required for analyses.  
6  
7  
8  
9

10 The absolute and relative non-inferiority margins used in published trials comparing  
11  
12 medications are large, allowing conclusions of non-inferiority in the context of large differences  
13  
14 in mortality, and highly variable. Most trials utilize non-inferiority margins based on an  
15  
16 absolute risk difference, which has only a moderate association with baseline estimates of risk  
17  
18 for outcomes. With increasing popularity of non-inferiority trials, clinicians and other users of  
19  
20 the medical literature should pay close attention to the size of non-inferiority margins used in  
21  
22 these trials and consider the influence of study design parameters and inherent trial  
23  
24 characteristics when interpreting the results. A collaborative effort to develop standards for  
25  
26 the design and analyses of future non-inferiority trials would be beneficial to the scientific  
27  
28 community.  
29  
30  
31  
32  
33  
34  
35  
36  
37  
38  
39  
40  
41  
42  
43  
44  
45  
46  
47  
48  
49  
50  
51  
52  
53  
54  
55  
56  
57  
58  
59  
60

**REFERENCES**

- 1 Piaggio G, Elbourne DR, Altman DG, Pocock SJ, Evans SJ; CONSORT Group. Reporting of noninferiority and equivalence randomized trials: an extension of the CONSORT statement. *JAMA* 2006;295:1152-60.
- 2 Mauri L, D'Agostino RB. Challenges in the design and interpretation of noninferiority trials. *N Engl J Med* 2017;377:1357-67.
- 3 Suda KJ, Hurley AM, McKibbin T, Motl Moroney SE. Publication of noninferiority clinical trials: changes over a 20-year interval. *Pharmacotherapy* 2011;31:833-9.
- 4 Wangge G, Klungel OH, Roes KC, de Boer A, Hoes AW, Knol MJ. Room for improvement in conducting and reporting non-inferiority randomized controlled trials on drugs: a systematic review. *PLoS ONE* 2010;5:e13550. doi:10.1371/journal.pone.0013550
- 5 Schiller P, Burchardi N, Niestroj M, Kieser M. Quality of reporting of clinical non-inferiority and equivalence randomised trials—update and extension. *Trials* 2012;13:214. <https://doi.org/10.1186/1745-6215-13-214>
- 6 Lange S, Freitag G. Choice of delta: requirements and reality—results of a systematic review. *Biom J* 2005;47:12-27.
- 7 Althunian TA, de Boer A, Klungel OH, Insani WN, Groenwold RH. Methods of defining the non-inferiority margin in randomized, double-blind controlled trials: a systematic review. *Trials* 2017;18:107. <https://doi.org/10.1186/s13063-017-1859-x>

- 1  
2  
3 8 Rehal S, Morris TP, Fielding K, Carpenter JR, Phillips PP. Non-inferiority trials: are they  
4 inferior? A systematic review of reporting in major medical journals. *BMJ Open*  
5  
6 2016;6:e012594. doi: 10.1136/bmjopen-2016-012594  
7  
8  
9  
10 9 Schumi J, Wittes JT. Through the looking glass: understanding non-inferiority. *Trials*  
11  
12 2011;12:106. <https://doi.org/10.1186/1745-6215-12-106>  
13  
14  
15 10 D'Agostino RB, Massaro JM, Sullivan LM. Non-inferiority trials: design concepts and issues—  
16 the encounters of academic consultants in statistics. *Statist Med* 2003;22:169-86.  
17  
18  
19 11 Aberegg SK, Hersh AM, Samore MH. Empirical consequences of current recommendations  
20 for the design and interpretation of noninferiority trials. *J Gen Intern Med* 2018;33:88-96.  
21  
22  
23 12 Hersh AM, Walter RJ, Abberegg SK. Use of mortality as an endpoint in noninferiority trials  
24 may lead to ethically problematic conclusions. *J Gen Intern Med* 2019;34:618-23.  
25  
26  
27 13 Center for Drug Evaluation and Research, Center for Biologics Evaluation and Research.  
28 Non-inferiority clinical trials to establish effectiveness—guidance for industry. Silver Spring,  
29 MD: Food and Drug Administration, November 2016. Available at:  
30  
31 [https://www.fda.gov/regulatory-information/search-fda-guidance-documents/non-](https://www.fda.gov/regulatory-information/search-fda-guidance-documents/non-inferiority-clinical-trials)  
32 inferiority-clinical-trials  
33  
34  
35  
36  
37  
38  
39  
40  
41  
42 14 Moher D, Liberati A, Tetzlaff J, Altman DG; PRISMA Group. Preferred reporting items for  
43 systematic reviews and meta-analyses: the PRISMA statement. *BMJ* 2009;339:b2535.  
44  
45  
46  
47 15 Abulizi X, Flandre P. Choice of treatment-effect measures when noninferiority margins  
48 originally defined in absolute difference translated into relative difference influenced the  
49 results of clinical trials. *J Clin Epidemiol* 2018;96:63-72.  
50  
51  
52  
53  
54  
55  
56  
57  
58  
59  
60



- 1  
2  
3 16 Head SJ, Kaul S, Bogers AJ, Kappetein AP. Non-inferiority study design: lessons to be learned  
4  
5 from cardiovascular trials. *Eur Heart J* 2012;33:1318-24.  
6  
7  
8 17 Althunian TA, de Boer A, Groenwold RHH, Klungel OH. Defining the noninferiority margin  
9  
10 and analysing noninferiority: an overview. *Br J Clin Pharmacol* 2017;83:1636-42.  
11  
12  
13 18 Gladstone BP, Vach W. Choice of non-inferiority (NI) margins does not protect against  
14  
15 degradation of treatment effects on an average—an observational study of registered and  
16  
17 published NI trials. *PLoS ONE* 2014;9:e103616. doi:10.1371/journal.pone.0103616  
18  
19  
20 19 Gayet-Ageron A, Agoritsas T, Rudaz S, Courvoisier D, Perneger T. The choice of the  
21  
22 noninferiority margin in clinical trials was driven by baseline risk, type of primary outcome,  
23  
24 and benefits of new treatment. *J Clin Epidemiol* 2015;68:1144-51.  
25  
26  
27  
28  
29  
30  
31  
32  
33  
34  
35  
36  
37  
38  
39  
40  
41  
42  
43  
44  
45  
46  
47  
48  
49  
50  
51  
52  
53  
54  
55  
56  
57  
58  
59  
60

## STATEMENTS

### Author contributions

SP, ND and RF drafted the study protocol. SP designed the data collection form, screened titles and abstracts, performed statistical analyses and drafted the study manuscript. SP and MU reviewed full-text articles and performed data collection. ND, MU, RF, NM, WS, JH and MS critically reviewed the final manuscript.

### Licence statement

The Submitting Author has the right to grant and does grant on behalf of all authors of the Work (as defined in the below author licence), an exclusive licence and/or a non-exclusive licence for contributions from authors who are: i) UK Crown employees; ii) where BMJ has agreed a CC-BY licence shall apply, and/or iii) in accordance with the terms applicable for US Federal Government officers or employees acting as part of their official duties; on a worldwide, perpetual, irrevocable, royalty-free basis to BMJ Publishing Group Ltd ("BMJ") its licensees and where the relevant Journal is co-owned by BMJ to the co-owners of the Journal, to publish the Work in BMJ Open and any other BMJ products and to exploit all rights, as set out in our licence.

The Submitting Author accepts and understands that any supply made under these terms is made by BMJ to the Submitting Author unless you are acting as an employee on behalf of your employer or a postgraduate student of an affiliated institution which is paying any applicable article publishing charge ("APC") for Open Access articles. Where the Submitting Author wishes to make the Work available on an Open Access basis (and intends to pay the relevant APC), the terms of reuse of such Open Access shall be governed by a Creative Commons licence – details of these licences and which Creative Commons licence will apply to this Work are set out in our licence referred to above.

### Competing interests declaration

All authors have completed the ICMJE uniform disclosure form and declare: no support from any organisation for the submitted work; no financial relationships with any organisations that might have an interest in the submitted work in the previous three years, no other relationships or activities that could appear to have influenced the submitted work.

### Ethics approval

Not required

### Funding statement

This research received no specific grant from any funding agency in the public, commercial or not-for-profit sectors. SP is supported by a SickKids Clinician-Scientist Training Program Scholarship from The Hospital for Sick Children. MU is supported by a Vanier Canada Graduate Scholarship from the Canadian Institutes of Health Research.

1  
2  
3 **Patient and public involvement statement**

4 It was not appropriate or possible to involve patients or the public in the design, or conduct, or  
5 reporting, or dissemination plans of our research.  
6  
7

8 **Data sharing statement**

9 Data and statistical code are available on request to the corresponding author.  
10  
11  
12  
13  
14  
15  
16  
17  
18  
19  
20  
21  
22  
23  
24  
25  
26  
27  
28  
29  
30  
31  
32  
33  
34  
35  
36  
37  
38  
39  
40  
41  
42  
43  
44  
45  
46  
47  
48  
49  
50  
51  
52  
53  
54  
55  
56  
57  
58  
59  
60

For peer review only

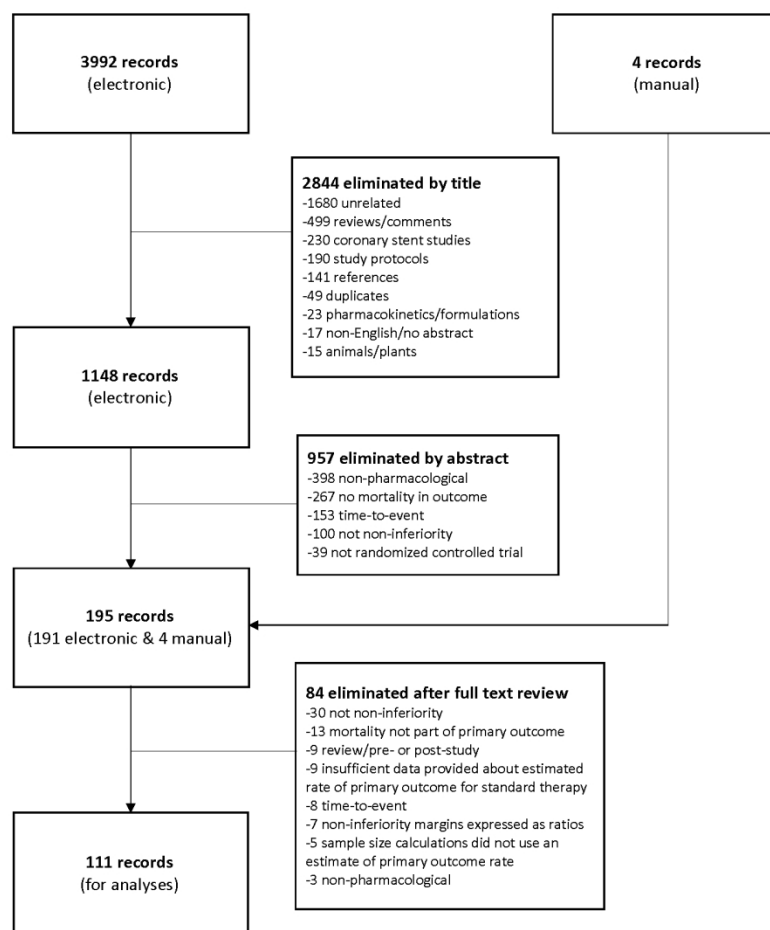

40  
41  
42  
43  
44  
45  
46  
47  
48  
49  
50  
51  
52  
53  
54  
55  
56  
57  
58  
59  
60

Figure 1: PRISMA flow diagram<sup>14</sup>

Figure 1: PRISMA flow diagram

215x279mm (200 x 200 DPI)

1  
2  
3  
4  
5  
6  
7  
8  
9  
10  
11  
12  
13  
14  
15  
16  
17  
18  
19  
20  
21  
22  
23  
24  
25  
26  
27  
28  
29  
30  
31  
32  
33  
34  
35  
36  
37  
38  
39  
40  
41  
42  
43  
44  
45  
46  
47  
48  
49  
50  
51  
52  
53  
54  
55  
56  
57  
58  
59  
60

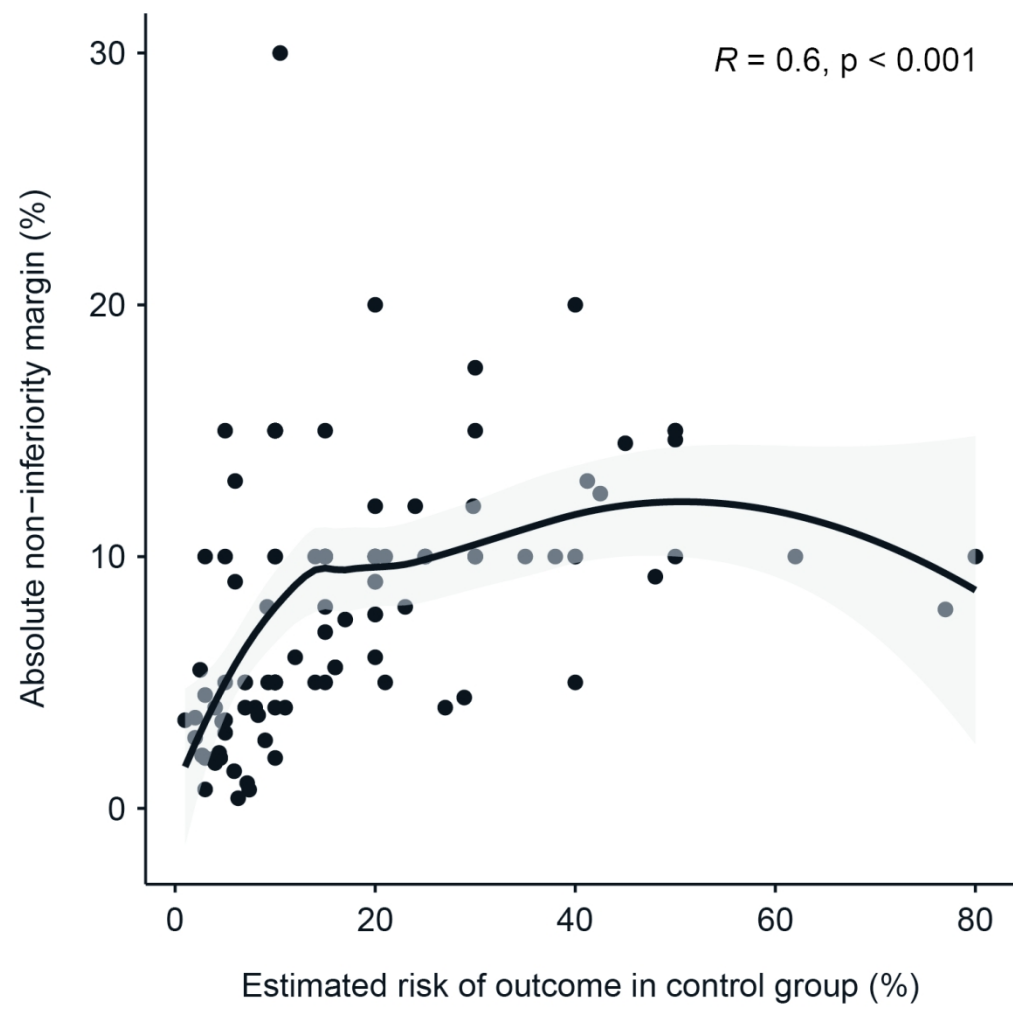

Figure 2: Association between absolute non-inferiority margins and estimated risks of outcome in control group

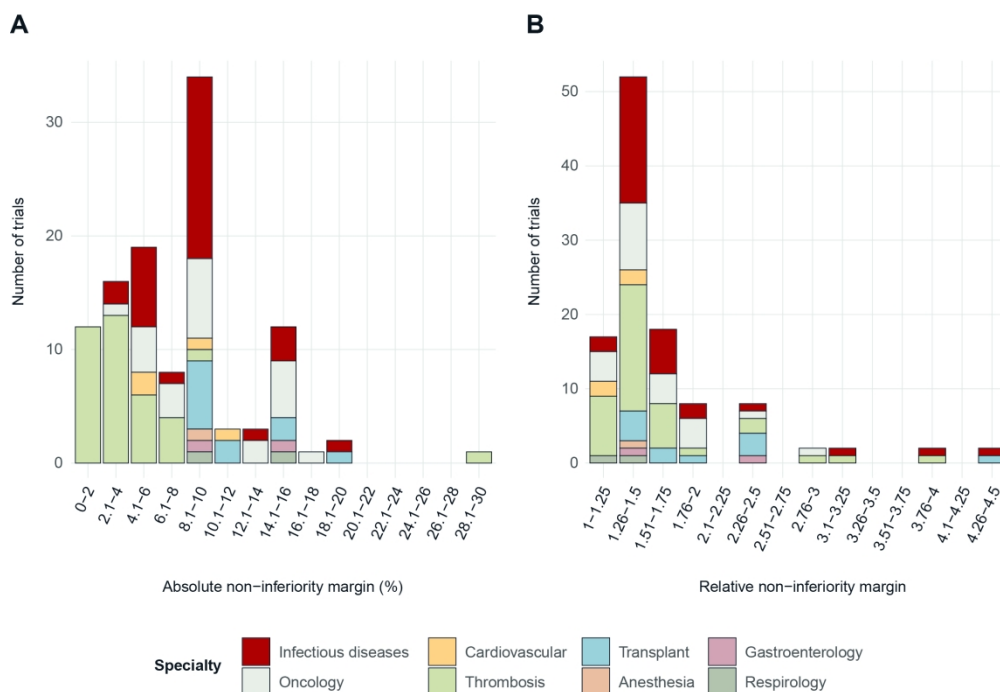

Figure 3: Distribution of absolute and relative non-inferiority margins for primary outcomes involving mortality

## Appendix A: Search strategy

### MEDLINE

|    | Searches                                                                                                                                                                                       | Results | Annotations |
|----|------------------------------------------------------------------------------------------------------------------------------------------------------------------------------------------------|---------|-------------|
| 1  | equivalence trial/                                                                                                                                                                             | 503     |             |
| 2  | equivalence trials as topic/                                                                                                                                                                   | 282     |             |
| 3  | (noninferiority or non-inferiority or equivalence or equivilency or<br>equivilencies or inferiority or "NI margin*" or "delta margin*" or<br>(prespecified adj2 margin*) or margins).ti,ab,kf. | 70165   |             |
| 4  | or/1-3                                                                                                                                                                                         | 70414   |             |
| 5  | mo.fs.                                                                                                                                                                                         | 561893  |             |
| 6  | (mortality or mortalities or death or deaths or dying or fatal*).ti,ab,kf.                                                                                                                     | 1493002 |             |
| 7  | mortality/ or cause of death/ or fatal outcome/ or hospital mortality/ or<br>infant mortality/ or maternal mortality/                                                                          | 213608  |             |
| 8  | or/5-7 [****mortality terms****]                                                                                                                                                               | 1834719 |             |
| 9  | 4 and 8 [****base clinical set****]                                                                                                                                                            | 9115    |             |
| 10 | randomized controlled trial.pt.                                                                                                                                                                | 500401  |             |
| 11 | controlled clinical trial.pt.                                                                                                                                                                  | 93574   |             |
| 12 | randomized.ab.                                                                                                                                                                                 | 469732  |             |
| 13 | placebo.ab.                                                                                                                                                                                    | 205181  |             |
| 14 | drug therapy.fs.                                                                                                                                                                               | 2180485 |             |
| 15 | randomly.ab.                                                                                                                                                                                   | 327066  |             |
| 16 | trial.ab.                                                                                                                                                                                      | 494306  |             |
| 17 | groups.ab.                                                                                                                                                                                     | 2008069 |             |
| 18 | or/10-17                                                                                                                                                                                       | 4632786 |             |

|    |                                                                                                                                           |         |
|----|-------------------------------------------------------------------------------------------------------------------------------------------|---------|
| 19 | exp animals/ not humans.sh.                                                                                                               | 4672546 |
| 20 | 18 not 19 [****Cochrane Handbook Highly Sensitive Search Strategy for 4014138 identifying randomized trials (Box 6.4.c 2008 version)****] |         |
| 21 | 9 and 20 [****Final results****]                                                                                                          | 3721    |
| 22 | limit 21 to (english language and humans and yr="1989 -Current")                                                                          | 3212    |

## Medline-in-Process

|    | Searches                                                                                                                                                                                 | Results | Annotations |
|----|------------------------------------------------------------------------------------------------------------------------------------------------------------------------------------------|---------|-------------|
| 1  | equivalenc*adj3 trial*.ti,ab,kf.                                                                                                                                                         | 0       |             |
| 2  | (noninferiority or non-inferiority or equivalence or equivilency or equivilencies or inferiority or "NI margin*" or "delta margin*" or (prespecified adj2 margin*) or margins).ti,ab,kf. | 70227   |             |
| 3  | or/1-2                                                                                                                                                                                   | 70227   |             |
| 4  | (mortality or mortalities or death or deaths or dying or fatal*).ti,ab,kf.                                                                                                               | 1493992 |             |
| 5  | 3 and 4 [****Base clinical set****]                                                                                                                                                      | 5800    |             |
| 6  | ((randomized or randomised or controlled) adj3 trial*).ti,ab,kf.                                                                                                                         | 401027  |             |
| 7  | placebo.ab.                                                                                                                                                                              | 205277  |             |
| 8  | randomly.ab.                                                                                                                                                                             | 327266  |             |
| 9  | trial.ab.                                                                                                                                                                                | 494765  |             |
| 10 | groups.ab.                                                                                                                                                                               | 2009271 |             |
| 11 | or/6-10 [***Trial terms***]                                                                                                                                                              | 2722197 |             |
| 12 | 5 and 11 [****Final results****]                                                                                                                                                         | 2313    |             |

## Medline Epubs Ahead of Print



|    | Searches                                                                   | Results | Annotations |
|----|----------------------------------------------------------------------------|---------|-------------|
| 1  | equivalenc*adj3 trial*.ti,ab,kf.                                           | 0       |             |
| 2  | (noninferiority or non-inferiority or equivalence or equivalency or        | 70227   |             |
| 3  | equivilencies or inferiority or "NI margin*" or "delta margin*" or         |         |             |
| 4  | (prespecified adj2 margin*) or margins).ti,ab,kf.                          |         |             |
| 5  | or/1-2                                                                     | 70227   |             |
| 6  | (mortality or mortalities or death or deaths or dying or fatal*).ti,ab,kf. | 1493992 |             |
| 7  | 3 and 4 [****Base clinical set****]                                        | 5800    |             |
| 8  | ((randomized or randomised or controlled) adj3 trial*).ti,ab,kf.           | 401027  |             |
| 9  | placebo.ab.                                                                | 205277  |             |
| 10 | randomly.ab.                                                               | 327266  |             |
| 11 | trial.ab.                                                                  | 494765  |             |
| 12 | groups.ab.                                                                 | 2009271 |             |
| 13 | or/6-10 [****Trial terms****]                                              | 2722197 |             |
| 14 | 5 and 11 [****Final results****]                                           | 2313    |             |
| 15 | equivalenc*adj3 trial*.ti,ab,kf.                                           | 0       |             |
| 16 | (noninferiority or non-inferiority or equivalence or equivalency or        | 70227   |             |
| 17 | equivilencies or inferiority or "NI margin*" or "delta margin*" or         |         |             |
| 18 | (prespecified adj2 margin*) or margins).ti,ab,kf.                          |         |             |
| 19 | or/13-14                                                                   | 70227   |             |
| 20 | (mortality or mortalities or death or deaths or dying or fatal*).ti,ab,kf. | 1493992 |             |
| 21 | 15 and 16 [****Base clinical set****]                                      | 5800    |             |
| 22 | ((randomized or randomised or controlled) adj3 trial*).ti,ab,kf.           | 401027  |             |
| 23 | placebo.ab.                                                                | 205277  |             |

|    |                                   |         |
|----|-----------------------------------|---------|
| 20 | randomly.ab.                      | 327266  |
| 21 | trial.ab.                         | 494765  |
| 22 | groups.ab.                        | 2009271 |
| 23 | or/18-22 [***Trial terms***]      | 2722197 |
| 24 | 17 and 23 [****Final results****] | 2313    |

### Embase Classic+Embase databases (OvidSP)

|    | Searches                                                                                                                                                                                       | Results | Annotations |
|----|------------------------------------------------------------------------------------------------------------------------------------------------------------------------------------------------|---------|-------------|
| 1  | equivalenc*adj3 trial*.ti,ab,kf.                                                                                                                                                               | 0       |             |
| 2  | (noninferiority or non-inferiority or equivalence or equivalency or<br>equivilencies or inferiority or "NI margin*" or "delta margin*" or<br>(prespecified adj2 margin*) or margins).ti,ab,kf. | 70227   |             |
| 3  | or/1-2                                                                                                                                                                                         | 70227   |             |
| 4  | (mortality or mortalities or death or deaths or dying or fatal*).ti,ab,kf.                                                                                                                     | 1493992 |             |
| 5  | 3 and 4 [****Base clinical set****]                                                                                                                                                            | 5800    |             |
| 6  | ((randomized or randomised or controlled) adj3 trial*).ti,ab,kf.                                                                                                                               | 401027  |             |
| 7  | placebo.ab.                                                                                                                                                                                    | 205277  |             |
| 8  | randomly.ab.                                                                                                                                                                                   | 327266  |             |
| 9  | trial.ab.                                                                                                                                                                                      | 494765  |             |
| 10 | groups.ab.                                                                                                                                                                                     | 2009271 |             |
| 11 | or/6-10 [***Trial terms***]                                                                                                                                                                    | 2722197 |             |
| 12 | 5 and 11 [****Final results****]                                                                                                                                                               | 2313    |             |
| 13 | equivalenc*adj3 trial*.ti,ab,kf.                                                                                                                                                               | 0       |             |

1  
2  
3  
4  
5  
6  
7  
8  
9  
10  
11  
12  
13  
14  
15  
16  
17  
18  
19  
20  
21  
22  
23  
24  
25  
26  
27  
28  
29  
30  
31  
32  
33  
34  
35  
36  
37  
38  
39  
40  
41  
42  
43  
44  
45  
46  
47  
48  
49  
50  
51  
52  
53  
54  
55  
56  
57  
58  
59  
60

|    |                                                                                                                                                                                                                                                   |         |
|----|---------------------------------------------------------------------------------------------------------------------------------------------------------------------------------------------------------------------------------------------------|---------|
| 14 | (noninferiority or non-inferiority or equivalence or equivalency or<br>equivilencies or inferiority or "NI margin*" or "delta margin*" or<br>(prespecified adj2 margin*) or margins).ti,ab,kf.                                                    | 70227   |
| 15 | or/13-14                                                                                                                                                                                                                                          | 70227   |
| 16 | (mortality or mortalities or death or deaths or dying or fatal*).ti,ab,kf.                                                                                                                                                                        | 1493992 |
| 17 | 15 and 16 [****Base clinical set****]                                                                                                                                                                                                             | 5800    |
| 18 | ((randomized or randomised or controlled) adj3 trial*).ti,ab,kf.                                                                                                                                                                                  | 401027  |
| 19 | placebo.ab.                                                                                                                                                                                                                                       | 205277  |
| 20 | randomly.ab.                                                                                                                                                                                                                                      | 327266  |
| 21 | trial.ab.                                                                                                                                                                                                                                         | 494765  |
| 22 | groups.ab.                                                                                                                                                                                                                                        | 2009271 |
| 23 | or/18-22 [***Trial terms***]                                                                                                                                                                                                                      | 2722197 |
| 24 | 17 and 23 [****Final results****]                                                                                                                                                                                                                 | 2313    |
| 25 | (equivalen* adj2 trial*).ti,ab.                                                                                                                                                                                                                   | 758     |
| 26 | (noninferiority or non-inferiority or equivalence or equivalency or<br>equivilencies or inferiority or "NI margin*" or "delta margin*" or<br>(prespecified adj2 margin*) or margins).ti,ab.                                                       | 69786   |
| 27 | or/25-26 [***equivalency or non-inferiority terms****]                                                                                                                                                                                            | 69985   |
| 28 | (mortality or mortalities or death or deaths or dying or fatal*).ti,ab.                                                                                                                                                                           | 1473665 |
| 29 | mortality/ or cancer mortality/ or childhood mortality/ or embryo<br>mortality/ or fetus mortality/ or infant mortality/ or maternal mortality/<br>or prenatal mortality/ or surgical mortality/ or perinatal mortality/ or<br>newborn mortality/ | 77281   |
| 30 | death/ or "cause of death"/ or dying/ or heart death/ or sudden death/<br>or child death/ or newborn death/                                                                                                                                       | 75385   |
| 31 | or/28-30 [****mortality terms****]                                                                                                                                                                                                                | 1511412 |

|    |    |                                                                          |
|----|----|--------------------------------------------------------------------------|
| 1  |    |                                                                          |
| 2  |    |                                                                          |
| 3  |    |                                                                          |
| 4  | 32 | 27 and 31 [****Base clinical set****]                                    |
| 5  |    | 5823                                                                     |
| 6  | 33 | randomized controlled trial/                                             |
| 7  |    | 500622                                                                   |
| 8  | 34 | double-blind procedure/                                                  |
| 9  |    | 0                                                                        |
| 10 | 35 | single-blind procedure/                                                  |
| 11 |    | 0                                                                        |
| 12 | 36 | crossover-procedure/                                                     |
| 13 |    | 0                                                                        |
| 14 | 37 | random*.ti,ab,kw.                                                        |
| 15 |    | 1109854                                                                  |
| 16 | 38 | factorial*.ti,ab,kw.                                                     |
| 17 |    | 29313                                                                    |
| 18 | 39 | crossover*.ti,ab,kw.                                                     |
| 19 |    | 62938                                                                    |
| 20 | 40 | "cross over".ti,ab,kw.                                                   |
| 21 |    | 22789                                                                    |
| 22 | 41 | "cross-over*".ti,ab,kw.                                                  |
| 23 |    | 23015                                                                    |
| 24 | 42 | placebo*.ti,ab,kw.                                                       |
| 25 |    | 212808                                                                   |
| 26 | 43 | (doubl* adj5 blind*).ti,ab,kw.                                           |
| 27 |    | 149043                                                                   |
| 28 | 44 | (singl* adj5 blind*).ti,ab,kw.                                           |
| 29 |    | 22640                                                                    |
| 30 | 45 | assign*.ti,ab,kw.                                                        |
| 31 |    | 308920                                                                   |
| 32 | 46 | allocat*.ti,ab,kw.                                                       |
| 33 |    | 115873                                                                   |
| 34 | 47 | volunteer*.ti,ab,kw.                                                     |
| 35 |    | 189496                                                                   |
| 36 | 48 | or/33-47 [****Cochrane Box 6.3.2.2 EMBASE sensitive                      |
| 37 |    | TherapyTreatment Effectiveness Filter terms****]                         |
| 38 |    | 1731635                                                                  |
| 39 | 49 | 32 and 48 [***Cochrane trial filter****]                                 |
| 40 |    | 1802                                                                     |
| 41 | 50 | ct.fs.                                                                   |
| 42 |    | 0                                                                        |
| 43 | 51 | 32 and 50 [***clinical trial subheading****]                             |
| 44 |    | 0                                                                        |
| 45 | 52 | limit 32 to (randomized controlled trial or controlled clinical trial or |
| 46 |    | multicenter study)                                                       |
| 47 |    | 1230                                                                     |
| 48 |    |                                                                          |
| 49 |    |                                                                          |
| 50 |    |                                                                          |
| 51 |    |                                                                          |
| 52 |    |                                                                          |
| 53 |    |                                                                          |
| 54 |    |                                                                          |
| 55 |    |                                                                          |
| 56 |    |                                                                          |
| 57 |    |                                                                          |
| 58 |    |                                                                          |
| 59 |    |                                                                          |
| 60 |    |                                                                          |

|    |    |                                                                               |
|----|----|-------------------------------------------------------------------------------|
| 1  |    |                                                                               |
| 2  |    |                                                                               |
| 3  |    |                                                                               |
| 4  | 53 | or/49,51-52 [****Final results****] 1974                                      |
| 5  |    |                                                                               |
| 6  | 54 | limit 53 to conference abstract [Limit not valid in Ovid MEDLINE(R),Ovid 1974 |
| 7  |    | MEDLINE(R) Daily Update,Ovid MEDLINE(R) In-Process,Ovid MEDLINE(R)            |
| 8  |    | Publisher; records were retained]                                             |
| 9  |    |                                                                               |
| 10 |    |                                                                               |
| 11 | 55 | 53 not 54 [***Conference abstracts removed****] 0                             |
| 12 |    |                                                                               |
| 13 | 56 | limit 55 to (human and english language and yr="1989 -Current") 0             |
| 14 |    |                                                                               |
| 15 |    |                                                                               |
| 16 |    |                                                                               |
| 17 |    |                                                                               |
| 18 |    |                                                                               |
| 19 |    |                                                                               |
| 20 |    |                                                                               |
| 21 |    |                                                                               |
| 22 |    |                                                                               |
| 23 |    |                                                                               |
| 24 |    |                                                                               |
| 25 |    |                                                                               |
| 26 |    |                                                                               |
| 27 |    |                                                                               |
| 28 |    |                                                                               |
| 29 |    |                                                                               |
| 30 |    |                                                                               |
| 31 |    |                                                                               |
| 32 |    |                                                                               |
| 33 |    |                                                                               |
| 34 |    |                                                                               |
| 35 |    |                                                                               |
| 36 |    |                                                                               |
| 37 |    |                                                                               |
| 38 |    |                                                                               |
| 39 |    |                                                                               |
| 40 |    |                                                                               |
| 41 |    |                                                                               |
| 42 |    |                                                                               |
| 43 |    |                                                                               |
| 44 |    |                                                                               |
| 45 |    |                                                                               |
| 46 |    |                                                                               |
| 47 |    |                                                                               |
| 48 |    |                                                                               |
| 49 |    |                                                                               |
| 50 |    |                                                                               |
| 51 |    |                                                                               |
| 52 |    |                                                                               |
| 53 |    |                                                                               |
| 54 |    |                                                                               |
| 55 |    |                                                                               |
| 56 |    |                                                                               |
| 57 |    |                                                                               |
| 58 |    |                                                                               |
| 59 |    |                                                                               |
| 60 |    |                                                                               |

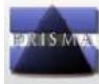

# PRISMA 2009 Checklist

| Section/topic                      | #  | Checklist item                                                                                                                                                                                                                                                                                              | Reported on page #             |
|------------------------------------|----|-------------------------------------------------------------------------------------------------------------------------------------------------------------------------------------------------------------------------------------------------------------------------------------------------------------|--------------------------------|
| <b>TITLE</b>                       |    |                                                                                                                                                                                                                                                                                                             |                                |
| Title                              | 1  | Identify the report as a systematic review, meta-analysis, or both.                                                                                                                                                                                                                                         | 1                              |
| <b>ABSTRACT</b>                    |    |                                                                                                                                                                                                                                                                                                             |                                |
| Structured summary                 | 2  | Provide a structured summary including, as applicable: background; objectives; data sources; study eligibility criteria, participants, and interventions; study appraisal and synthesis methods; results; limitations; conclusions and implications of key findings; systematic review registration number. | 2-3                            |
| <b>INTRODUCTION</b>                |    |                                                                                                                                                                                                                                                                                                             |                                |
| Rationale                          | 3  | Describe the rationale for the review in the context of what is already known.                                                                                                                                                                                                                              | 5-6                            |
| Objectives                         | 4  | Provide an explicit statement of questions being addressed with reference to participants, interventions, comparisons, outcomes, and study design (PICOS).                                                                                                                                                  | 6                              |
| <b>METHODS</b>                     |    |                                                                                                                                                                                                                                                                                                             |                                |
| Protocol and registration          | 5  | Indicate if a review protocol exists, if and where it can be accessed (e.g., Web address), and, if available, provide registration information including registration number.                                                                                                                               | n/a                            |
| Eligibility criteria               | 6  | Specify study characteristics (e.g., PICOS, length of follow-up) and report characteristics (e.g., years considered, language, publication status) used as criteria for eligibility, giving rationale.                                                                                                      | 7-8                            |
| Information sources                | 7  | Describe all information sources (e.g., databases with dates of coverage, contact with study authors to identify additional studies) in the search and date last searched.                                                                                                                                  | 6-7                            |
| Search                             | 8  | Present full electronic search strategy for at least one database, including any limits used, such that it could be repeated.                                                                                                                                                                               | Supplementary file: Appendix A |
| Study selection                    | 9  | State the process for selecting studies (i.e., screening, eligibility, included in systematic review, and, if applicable, included in the meta-analysis).                                                                                                                                                   | 8                              |
| Data collection process            | 10 | Describe method of data extraction from reports (e.g., piloted forms, independently, in duplicate) and any processes for obtaining and confirming data from investigators.                                                                                                                                  | 8                              |
| Data items                         | 11 | List and define all variables for which data were sought (e.g., PICOS, funding sources) and any assumptions and simplifications made.                                                                                                                                                                       | 8                              |
| Risk of bias in individual studies | 12 | Describe methods used for assessing risk of bias of individual studies (including specification of whether this was done at the study or outcome level), and how this information is to be used in any data synthesis.                                                                                      | n/a                            |
| Summary measures                   | 13 | State the principal summary measures (e.g., risk ratio, difference in means).                                                                                                                                                                                                                               | 9                              |
| Synthesis of results               | 14 | Describe the methods of handling data and combining results of studies, if done, including measures of consistency (e.g., $I^2$ ) for each meta-analysis.                                                                                                                                                   | 9-10                           |

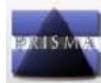

# PRISMA 2009 Checklist

Page 1 of 2

| Section/topic                 | #  | Checklist item                                                                                                                                                                                           | Reported on page # |
|-------------------------------|----|----------------------------------------------------------------------------------------------------------------------------------------------------------------------------------------------------------|--------------------|
| Risk of bias across studies   | 15 | Specify any assessment of risk of bias that may affect the cumulative evidence (e.g., publication bias, selective reporting within studies).                                                             | n/a                |
| Additional analyses           | 16 | Describe methods of additional analyses (e.g., sensitivity or subgroup analyses, meta-regression), if done, indicating which were pre-specified.                                                         | n/a                |
| <b>RESULTS</b>                |    |                                                                                                                                                                                                          |                    |
| Study selection               | 17 | Give numbers of studies screened, assessed for eligibility, and included in the review, with reasons for exclusions at each stage, ideally with a flow diagram.                                          | 10, Figure 1       |
| Study characteristics         | 18 | For each study, present characteristics for which data were extracted (e.g., study size, PICOS, follow-up period) and provide the citations.                                                             | 10                 |
| Risk of bias within studies   | 19 | Present data on risk of bias of each study and, if available, any outcome level assessment (see item 12).                                                                                                | n/a                |
| Results of individual studies | 20 | For all outcomes considered (benefits or harms), present, for each study: (a) simple summary data for each intervention group (b) effect estimates and confidence intervals, ideally with a forest plot. | 12                 |
| Synthesis of results          | 21 | Present results of each meta-analysis done, including confidence intervals and measures of consistency.                                                                                                  | 11-15              |
| Risk of bias across studies   | 22 | Present results of any assessment of risk of bias across studies (see Item 15).                                                                                                                          | n/a                |
| Additional analysis           | 23 | Give results of additional analyses, if done (e.g., sensitivity or subgroup analyses, meta-regression [see Item 16]).                                                                                    | n/a                |
| <b>DISCUSSION</b>             |    |                                                                                                                                                                                                          |                    |
| Summary of evidence           | 24 | Summarize the main findings including the strength of evidence for each main outcome; consider their relevance to key groups (e.g., healthcare providers, users, and policy makers).                     | 15-18              |
| Limitations                   | 25 | Discuss limitations at study and outcome level (e.g., risk of bias), and at review-level (e.g., incomplete retrieval of identified research, reporting bias).                                            | 18-19              |
| Conclusions                   | 26 | Provide a general interpretation of the results in the context of other evidence, and implications for future research.                                                                                  | 19                 |
| <b>FUNDING</b>                |    |                                                                                                                                                                                                          |                    |
| Funding                       | 27 | Describe sources of funding for the systematic review and other support (e.g., supply of data); role of funders for the systematic review.                                                               | n/a                |

From: Moher D, Liberati A, Tetzlaff J, Altman DG, The PRISMA Group (2009). Preferred Reporting Items for Systematic Reviews and Meta-Analyses: The PRISMA Statement. PLoS Med 6(7): e1000097. doi:10.1371/journal.pmed1000097

For more information, visit: [www.prisma-statement.org](http://www.prisma-statement.org)

For peer review only - <http://bmjopen.bmj.com/site/about/guidelines.xhtml>

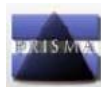

# PRISMA 2009 Checklist

For peer review only

- 1
- 2
- 3
- 4
- 5
- 6
- 7
- 8
- 9
- 10
- 11
- 12
- 13
- 14
- 15
- 16
- 17
- 18
- 19
- 20
- 21
- 22
- 23
- 24
- 25
- 26
- 27
- 28
- 29
- 30
- 31
- 32
- 33
- 34
- 35
- 36
- 37
- 38
- 39
- 40
- 41
- 42
- 43
- 44
- 45
- 46
- 47



# BMJ Open

## Testing for non-inferior mortality: a systematic review of non-inferiority margin sizes and trial characteristics

|                                 |                                                                                                                                                                                                                                                                                                                                                                                                                                                                                                                                                                                                                                                                                                                                                                                                                                                                                                              |
|---------------------------------|--------------------------------------------------------------------------------------------------------------------------------------------------------------------------------------------------------------------------------------------------------------------------------------------------------------------------------------------------------------------------------------------------------------------------------------------------------------------------------------------------------------------------------------------------------------------------------------------------------------------------------------------------------------------------------------------------------------------------------------------------------------------------------------------------------------------------------------------------------------------------------------------------------------|
| Journal:                        | <i>BMJ Open</i>                                                                                                                                                                                                                                                                                                                                                                                                                                                                                                                                                                                                                                                                                                                                                                                                                                                                                              |
| Manuscript ID                   | bmjopen-2020-044480.R1                                                                                                                                                                                                                                                                                                                                                                                                                                                                                                                                                                                                                                                                                                                                                                                                                                                                                       |
| Article Type:                   | Original research                                                                                                                                                                                                                                                                                                                                                                                                                                                                                                                                                                                                                                                                                                                                                                                                                                                                                            |
| Date Submitted by the Author:   | 03-Mar-2021                                                                                                                                                                                                                                                                                                                                                                                                                                                                                                                                                                                                                                                                                                                                                                                                                                                                                                  |
| Complete List of Authors:       | Pong, Sandra; The Hospital for Sick Children, Department of Pharmacy<br>Urner, Martin; University of Toronto, Interdepartmental Division of Critical Care Medicine; University of Toronto, Institute of Health Policy, Management and Evaluation<br>Fowler, Robert; Sunnybrook Health Sciences Centre, Tory Trauma Program; University of Toronto, Interdepartmental Division of Critical Care Medicine<br>Mitsakakis, Nicholas ; University of Toronto, Dalla Lana School of Public Health<br>Seto, Winnie; The Hospital for Sick Children, Department of Pharmacy; University of Toronto, Faculty of Pharmacy<br>Hutchison, Jamie; The Hospital for Sick Children, Department of Critical Care Medicine<br>Science, Michelle; The Hospital for Sick Children, Division of Infectious Diseases<br>Daneman, Nick; Sunnybrook Health Sciences Centre, Division of Infectious Diseases, Department of Medicine |
| <b>Primary Subject Heading</b>: | Research methods                                                                                                                                                                                                                                                                                                                                                                                                                                                                                                                                                                                                                                                                                                                                                                                                                                                                                             |
| Secondary Subject Heading:      | Epidemiology                                                                                                                                                                                                                                                                                                                                                                                                                                                                                                                                                                                                                                                                                                                                                                                                                                                                                                 |
| Keywords:                       | STATISTICS & RESEARCH METHODS, EPIDEMIOLOGY, Clinical trials < THERAPEUTICS                                                                                                                                                                                                                                                                                                                                                                                                                                                                                                                                                                                                                                                                                                                                                                                                                                  |
|                                 |                                                                                                                                                                                                                                                                                                                                                                                                                                                                                                                                                                                                                                                                                                                                                                                                                                                                                                              |

SCHOLARONE™  
Manuscripts



I, the Submitting Author has the right to grant and does grant on behalf of all authors of the Work (as defined in the below author licence), an exclusive licence and/or a non-exclusive licence for contributions from authors who are: i) UK Crown employees; ii) where BMJ has agreed a CC-BY licence shall apply, and/or iii) in accordance with the terms applicable for US Federal Government officers or employees acting as part of their official duties; on a worldwide, perpetual, irrevocable, royalty-free basis to BMJ Publishing Group Ltd ("BMJ") its licensees and where the relevant Journal is co-owned by BMJ to the co-owners of the Journal, to publish the Work in this journal and any other BMJ products and to exploit all rights, as set out in our [licence](#).

The Submitting Author accepts and understands that any supply made under these terms is made by BMJ to the Submitting Author unless you are acting as an employee on behalf of your employer or a postgraduate student of an affiliated institution which is paying any applicable article publishing charge ("APC") for Open Access articles. Where the Submitting Author wishes to make the Work available on an Open Access basis (and intends to pay the relevant APC), the terms of reuse of such Open Access shall be governed by a Creative Commons licence – details of these licences and which [Creative Commons](#) licence will apply to this Work are set out in our licence referred to above.

Other than as permitted in any relevant BMJ Author's Self Archiving Policies, I confirm this Work has not been accepted for publication elsewhere, is not being considered for publication elsewhere and does not duplicate material already published. I confirm all authors consent to publication of this Work and authorise the granting of this licence.

1  
2  
3  
4  
5  
6  
7  
8 **Testing for non-inferior mortality: a systematic review of non-inferiority margin sizes and trial**  
9 **characteristics**  
10  
11  
12  
13  
14  
15  
16  
17

18 Sandra Pong (0000-0003-2963-9601) *clinical pharmacist*<sup>1</sup>, Martin Urner *clinical and research*  
19 *fellow*<sup>2-3</sup>, Robert A Fowler *clinician scientist*<sup>2,4</sup>, Nicholas Mitsakakis *biostatistician*<sup>5</sup>, Winnie Seto  
20 *clinical pharmacist*<sup>1</sup>, James S Hutchison *senior scientist*<sup>6</sup>, Michelle Science *infectious diseases*  
21 *consultant*<sup>7</sup>, Nick Daneman *clinician scientist*<sup>8</sup>  
22  
23  
24  
25  
26  
27  
28

29 <sup>1</sup>Department of Pharmacy, The Hospital for Sick Children, Toronto, Ontario, Canada

30 <sup>2</sup>Interdepartmental Division of Critical Care Medicine, University of Toronto, Toronto, Ontario  
31 Canada

32 <sup>3</sup>Institute of Health Policy, Management and Evaluation, University of Toronto, Toronto,  
33 Ontario, Canada

34 <sup>4</sup>Tory Trauma Program, Sunnybrook Health Sciences Centre, Toronto, Ontario, Canada

35 <sup>5</sup>Dalla Lana School of Public Health, University of Toronto, Toronto, Ontario, Canada

36 <sup>6</sup>Department of Critical Care Medicine, The Hospital for Sick Children, Toronto, Ontario, Canada

37 <sup>7</sup>Division of Infectious Diseases, The Hospital for Sick Children, Toronto, Ontario, Canada

38 <sup>8</sup>Division of Infectious Diseases, Sunnybrook Health Sciences Centre, Toronto, Ontario, Canada  
39  
40  
41  
42  
43  
44  
45  
46

47 **Corresponding author:**

48 Sandra Pong

49 The Hospital for Sick Children

50 555 University Avenue

51 Toronto, Ontario, M5G 1X8

52 Canada

53 sandra.pong@sickkids.ca  
54  
55  
56  
57  
58  
59  
60

**ABSTRACT****OBJECTIVE**

To describe the size and variability of non-inferiority margins used in non-inferiority trials of medications with primary outcomes involving mortality, and to examine the association between trial characteristics and non-inferiority margin size.

**DESIGN**

Systematic review

**DATA SOURCES**

Medline, Medline In Process, Medline Epub Ahead of Print and Embase Classic+Embase databases from January 1989 to December 2019.

**ELIGIBILITY CRITERIA**

Prospective non-inferiority randomized controlled trials comparing pharmacological therapies, with primary analyses for non-inferiority and primary outcomes involving mortality alone or as part of a composite outcome. Trials had to pre-specify non-inferiority margins as absolute risk differences or relative to risks of outcome and provide a baseline risk of primary outcome in the control intervention.

## RESULTS

3992 records were screened, 195 articles were selected for full text review and 111 articles were included for analyses. 82% of trials were conducted in thrombosis, infectious diseases or oncology. Mortality was the sole primary outcome in 23 (21%) trials, and part of a composite primary outcome in 88 (79%) trials. The overall median non-inferiority margin was an absolute risk difference of 9% (IQR 4.2-10%). When non-inferiority margins were expressed relative to the baseline risk of primary outcome in control groups, the median relative non-inferiority margin was 1.5 (IQR 1.3-1.7). In multivariable regression analyses examining the association between trial characteristics (medical specialty, inclusion of pediatric patients, mortality as a sole or part of a composite primary outcome, presence of industry funding) and non-inferiority margin size, only medical specialty was significantly associated with non-inferiority margin size.

## CONCLUSION

Absolute and relative non-inferiority margins used in published trials comparing medications are large, allowing conclusions of non-inferiority in the context of large differences in mortality. Accepting the potential for large increases in outcomes involving mortality while declaring non-inferiority is a challenging methodological issue in the conduct of non-inferiority trials.

### STRENGTHS AND LIMITATIONS OF THIS STUDY

- There have been no previous reviews or studies that describe the size and variability of non-inferiority margins used in trials with high-stake outcomes such as mortality.
- Our comprehensive and sensitive search for non-inferiority trials spanned a 30-year period to ensure that virtually all non-inferiority trials with primary outcome involving mortality would be captured.
- We were reliant on authors to provide the values of non-inferiority margins and estimated risks of outcomes in their sample size calculations.

**WORD COUNT:** 3003 words

## INTRODUCTION

The premise of non-inferiority trials is to demonstrate that a new treatment is no worse than a standard intervention by a pre-specified non-inferiority margin chosen by researchers.<sup>1</sup> Yet proving that drugs, devices and other medical treatments are no worse than a comparison is challenging.<sup>2-3</sup> The acceptable width of the margin of non-inferiority is a controversial aspect in the design of these studies. It is a determinant of the required sample size of a trial and has a large influence on the interpretation of “not unacceptably worse.” Wide margins allow smaller sample sizes to conclude non-inferiority, but if a margin is too wide, a conclusion of non-inferiority could be clinically irrelevant or ethically inappropriate. This would be especially disturbing if the implications of accepting a truly inadequate treatment as non-inferior involves death as an outcome.<sup>2</sup>

Design and analytical challenges, and the deficits in adherence to reporting standards of non-inferiority trials have been described in multiple studies and reviews.<sup>4-12</sup> Much attention has been focused on how non-inferiority margins are selected, whether they are justified<sup>10,13</sup> and how they affect the validity of trial results and conclusions.<sup>11-12</sup> The size of non-inferiority margins could also be influenced by the effectiveness of the standard treatment. A highly effective standard treatment could allow researchers to tolerate higher thresholds for decreased effectiveness with a new treatment.<sup>14</sup> However, prior research has not described the size and variability of non-inferiority margins used in trials with high-stake outcomes such as mortality, nor examined whether certain trial characteristics such as the type of patients, medical conditions studied, choice of outcomes and baseline risks of outcomes are associated

1  
2  
3 with the selection of smaller or larger non-inferiority margins. There is a need to establish  
4  
5 standards for the design and analyses of non-inferiority trials to promote consistent quality of  
6  
7 these trials. An important step, therefore, is to identify the range of non-inferiority margins  
8  
9 used in non-inferiority trials and determine whether trial characteristics influence the selection  
10  
11 of margin sizes.  
12  
13  
14  
15  
16  
17

18 In this systematic review, our primary objective was to describe the size and variability of non-  
19  
20 inferiority margins used in non-inferiority trials of medications with primary outcomes involving  
21  
22 mortality. Our secondary objective was to assess whether selected trial characteristics were  
23  
24 associated with non-inferiority margin size. We hypothesized that non-inferiority margins in  
25  
26 these trials will be large and variable; and the size of non-inferiority margins will be related to  
27  
28 the type of patients and medical conditions studied, as well as availability of industry funding  
29  
30 and how mortality has been included in the outcome.  
31  
32  
33  
34  
35  
36

## 37 **METHODS**

38  
39 We followed the Preferred Reporting Items for Systematic Reviews and Meta-Analysis (PRISMA)  
40  
41 statement to report this systematic review.<sup>15</sup>  
42  
43  
44  
45  
46

### 47 **Search strategy**

48  
49 We searched Medline, Medline In Process, Medline Epub Ahead of Print and Embase  
50  
51 Classic+Embase databases (OvidSP) (search performed February 8, 2019, updated December  
52  
53 12, 2019) to identify randomized controlled non-inferiority trials published between 1989 and  
54  
55  
56  
57  
58  
59  
60



1  
2  
3 2019. Our decision to start our search from 1989 was informed by a review that described the  
4  
5 changes in publication rate of non-inferiority trials between 1989 and 2009, and found 583  
6  
7 published non-inferiority trials but only one that was published prior to 1998.<sup>3</sup>  
8  
9

10  
11  
12  
13 Subject heading and text-word terms for “equivalence trials or non-inferiority or inferiority  
14  
15 studies” and mortality were used with the Cochrane sensitive trials filter. Of note, “non-  
16  
17 inferiority trial” and “inferiority trial” terms are indexed together with “equivalence trial” in  
18  
19 Ovid and the term “equivalence trial” was only introduced as a Medical Subject Heading  
20  
21 (MeSH) in 2018. Results were restricted to the English language and trials performed in  
22  
23 humans. The complete electronic database search strategies are presented in Appendix A. To  
24  
25 ensure that all relevant trials were captured, the electronic database search was supplemented  
26  
27 with a manual search by scanning the reference lists of included trials and relevant reviews, in  
28  
29 addition to a search of the reviewers’ personal files.  
30  
31  
32  
33  
34  
35  
36  
37

### 38 **Eligibility criteria**

39  
40 We included all prospective non-inferiority randomized controlled trials involving human  
41  
42 subjects that compared pharmacological therapies, where the primary analysis was for non-  
43  
44 inferiority and the primary outcome included mortality, either alone or as part of a composite  
45  
46 outcome. All trials had to pre-specify a non-inferiority margin (as an absolute risk difference or  
47  
48 relative to the risk of outcome) and provide a baseline estimate of the risk of primary outcome  
49  
50 in the control intervention in a sample size calculation. In cases where these variables changed  
51  
52  
53  
54  
55  
56  
57  
58  
59  
60

1  
2  
3 during the course of the trial, the initial values used in the original trial design were used for  
4  
5 analyses. No distinction between pediatric or adult populations was made.  
6  
7  
8  
9

10 We excluded trials that did not provide a sample size calculation based on a pre-specified non-  
11  
12 inferiority margin and estimated baseline risk of outcome. To enable comparisons of non-  
13  
14 inferiority margins across different trials, we also excluded trials that used non-inferiority  
15  
16 inferiority margins expressed as incidence rate ratios, odds ratios or hazard ratios because incidence and  
17  
18 hazard ratios are relative to an outcome event rate that changes with time and with odds  
19  
20 ratios, the baseline risk of outcome in the control group cannot be determined to convert the  
21  
22 ratio to a relative non-inferiority margin unless it was explicitly stated by the authors. We also  
23  
24 excluded articles that described sub-studies, post-hoc analyses or follow-up studies of  
25  
26 randomized trials.  
27  
28  
29  
30  
31  
32  
33  
34

### 35 **Selection of trials**

36  
37 One review author (SP) screened titles and abstracts of all retrieved records for obvious  
38  
39 exclusions. Two review authors (SP and MU) independently assessed potentially eligible trials  
40  
41 based on full text review. Disagreements were resolved by arbitration by a third review author  
42  
43 (ND).  
44  
45  
46  
47  
48  
49

### 50 **Data collection**

51  
52 One review author (SP) extracted data from the included trials using a standardized form to  
53  
54 collect information on: year of publication, medical specialty area, inclusion of pediatric  
55  
56  
57  
58  
59  
60

1  
2  
3 patients (age less than 18 years), mortality as a single or part of a composite primary outcome,  
4  
5 estimated risk of primary outcome in the control group, non-inferiority margin, industry  
6  
7 funding (disclosures in the publication about funding or sponsorship by a pharmaceutical  
8  
9 company) and conclusion about non-inferiority.  
10  
11  
12  
13  
14

### 15 **Statistical analyses**

16  
17 Trial characteristics were summarized using counts and proportions. To enable comparisons of  
18  
19 non-inferiority margins across different trials as either absolute or relative margins, we  
20  
21 converted non-inferiority margins expressed as absolute risk differences in percentages into  
22  
23 relative non-inferiority margins relative to the estimated risk of outcome for each trial's control  
24  
25 group. The reverse was also done to convert relative non-inferiority margins into equivalent  
26  
27 margins in terms of absolute differences. Graphical plots were used to explore an association  
28  
29 between absolute non-inferiority margins and the estimated risks of outcome in control groups,  
30  
31 and to describe the distribution of absolute and relative non-inferiority margins used in the  
32  
33 trials.  
34  
35  
36  
37  
38  
39  
40  
41

42 For the primary objective, descriptive statistics (median, interquartile range (IQR), range) of  
43  
44 absolute and relative non-inferiority margins were summarized for the overall cohort of trials  
45  
46 included in the review. We also stratified these by trial characteristics: medical specialty,  
47  
48 inclusion of pediatric patients, mortality as a single or composite outcome, industry funding and  
49  
50 publication date pre- or post-2010 release of the first FDA draft guidance statement about non-  
51  
52 inferiority trials. To investigate whether there was a difference in non-inferiority margins  
53  
54  
55  
56  
57  
58  
59  
60

1  
2  
3 (absolute and relative) according to trial characteristics, we compared non-inferiority margins  
4  
5 using Wilcoxon rank sum test (for 2 groups) and Kruskal-Wallis rank sum test (for >2 groups).  
6  
7  
8  
9

10 For the secondary objective, we used multivariable linear regression to examine the association  
11  
12 between pre-specified trial characteristics (medical specialty, inclusion of pediatric patients,  
13  
14 mortality as single or composite outcome and industry funding) as independent variables and  
15  
16 non-inferiority margin size as the outcome variable. Due to the skewed distribution of the  
17  
18 absolute and relative non-inferiority margins, we applied a log-transformation to the outcome  
19  
20 variable which improved the performance and diagnostics of the regression models. All  
21  
22 comparisons were two-sided and  $p < 0.05$  was considered statistically significant. Statistical  
23  
24 analyses were conducted using R version 4.0.2.  
25  
26  
27  
28  
29  
30  
31

## 32 **RESULTS**

33  
34 We screened 3992 records for relevance using titles and abstracts and selected 195 articles for  
35  
36 full text review. After independent assessment of the full text articles and discussion among  
37  
38 reviewers, a total of 111 articles met eligibility criteria to be included for analyses (Figure 1).  
39  
40  
41

42 The agreement between reviewers was excellent (kappa statistic = 0.86).  
43  
44  
45  
46

47 <<Figure 1: PRISMA flow diagram<sup>15</sup>>>  
48  
49  
50  
51  
52  
53  
54  
55  
56  
57  
58  
59  
60

### Trial characteristics

Among the 111 trials included, 91 (82%) were trials conducted in thrombosis, infectious diseases or oncology. Mortality was the sole primary outcome in 23 (21%) trials, and part of a composite primary outcome in 88 (79%) trials. Over half of the trials disclosed receiving some form of industry funding. Of the included trials, 82 (74%) concluded non-inferiority, 21 (19%) did not conclude non-inferiority and the remaining 8 (7%) were either inconclusive, stopped early or unclear about their conclusions. The non-inferiority margin was expressed as an absolute risk difference in 109 (98%) trials. A summary of the included trials is provided in Appendix B.

### Association between absolute non-inferiority margins and estimated baseline risks of outcome (involving mortality) in control groups

Figure 2 is a scatterplot between absolute non-inferiority margins and estimated baseline risks of outcome (i.e. mortality alone or a composite outcome that included mortality) in the control group for the trials included in this review. A Spearman's correlation shows a moderate, positive monotonic correlation ( $r_s = 0.6$ ,  $p < 0.001$ ) between the two. Variability in the absolute non-inferiority margins can be seen at both high and low estimates of baseline risks of outcome. There was also a strong correlation between the observed outcomes reported in the trials and the initial estimated risks of outcome in the control groups ( $r_s = 0.81$ ,  $p < 0.001$ , Appendix C).

<<Figure 2: Association between absolute non-inferiority margins and estimated risks of outcome in control group>>

## <<Appendix C: Relationship between observed outcomes and estimated risks of outcome in control group>>

### Distribution of non-inferiority margins for outcomes involving mortality

The distribution of absolute non-inferiority margins subdivided by medical specialty is shown in Figure 3A. There was a wide range of non-inferiority margins for trial outcomes that involve mortality (0.4 to 30%), with a skewed distribution and distinct peaks observed at 5, 9 and 15%. Thrombosis trials used smaller non-inferiority margins more commonly than did other trials.

Figure 3B illustrates a similarly skewed distribution of relative non-inferiority margins subdivided by medical specialty. The most common relative non-inferiority margin observed was in the range of 1.26 to 1.5. Most relative non-inferiority margins clustered in the range of 1.3 to 1.7, however there were also many relative non-inferiority margins that were greater than 2.

### <<Figure 3: Distribution of absolute and relative non-inferiority margins for primary outcomes involving mortality>>

### Characteristics of non-inferiority margins

The characteristics of the non-inferiority margins in the trials included in this review are summarized in Table 1. The median absolute non-inferiority margin was 9% (IQR 4.2-10%) and the median relative non-inferiority margin was 1.5 (IQR 1.3-1.7).

**Table 1: Summary of characteristics of non-inferiority trials included**

|                                                                   | n (%)     | Absolute non-inferiority margin (%) for outcomes involving mortality |         |         | Relative non-inferiority margin for outcomes involving mortality |           |         |
|-------------------------------------------------------------------|-----------|----------------------------------------------------------------------|---------|---------|------------------------------------------------------------------|-----------|---------|
|                                                                   |           | Median (IQR <sup>a</sup> )                                           | Range   | p-value | Median (IQR <sup>a</sup> )                                       | Range     | p-value |
| <b>Overall</b>                                                    | 111       | 9 (4.2-10)                                                           | 0.4-30  | --      | 1.5 (1.3-1.7)                                                    | 1.1-4.5   | --      |
| <b>Medical specialty</b>                                          |           |                                                                      |         |         |                                                                  |           |         |
| <b>Thrombosis</b>                                                 | 37 (33.3) | 3.6 (2-5)                                                            | 0.4-30  | <0.001  | 1.4 (1.3-1.7)                                                    | 1.1-3.9   | 0.02    |
| <b>Infectious diseases</b>                                        | 31 (27.9) | 10 (5.5-10)                                                          | 3-20    |         | 1.5 (1.5-1.7)                                                    | 1.2-4.5   |         |
| <b>Oncology</b>                                                   | 23 (20.7) | 10 (7.5-13.8)                                                        | 4-17.5  |         | 1.5 (1.3-1.9)                                                    | 1.1-3     |         |
| <b>Transplant</b>                                                 | 11 (9.9)  | 10 (10-13.5)                                                         | 9-20    |         | 1.7 (1.5-2.5)                                                    | 1.4-4.3   |         |
| <b>Cardiology</b>                                                 | 4 (3.6)   | 7.5 (5-10.5)                                                         | 5-12    |         | 1.3 (1.2-1.3)                                                    | 1.1-1.4   |         |
| <b>Gastroenterology</b>                                           | 2 (1.8)   | 12.5 (11.3-13.8)                                                     | 10-15   |         | 1.9 (1.6-2.2)                                                    | 1.3-2.5   |         |
| <b>Respirology</b>                                                | 2 (1.8)   | 12.3 (11.1-13.4)                                                     | 10-14.5 |         | 1.3 (1.27-1.3)                                                   | 1.25-1.32 |         |
| <b>Anesthesia</b>                                                 | 1 (0.9)   | 10 (10-10)                                                           | 10-10   |         | 1.4 (1.4-1.4)                                                    | 1.4-1.4   |         |
| <b>Pediatric patients included</b>                                |           |                                                                      |         |         |                                                                  |           |         |
| <b>Yes</b>                                                        | 21 (18.9) | 10 (5-10)                                                            | 3.5-15  | 0.11    | 1.7 (1.5-2)                                                      | 1.2-4.5   | 0.10    |
| <b>No</b>                                                         | 85 (76.6) | 8 (4-10)                                                             | 0.7-30  |         | 1.5 (1.3-1.7)                                                    | 1.1-4.3   |         |
| <b>Unclear/not explicitly stated</b>                              | 5 (4.5)   | 5.5 (2.2-5.6)                                                        | 0.4-10  |         | 1.4 (1.1-1.5)                                                    | 1.1-3.2   |         |
| <b>Mortality outcome</b>                                          |           |                                                                      |         |         |                                                                  |           |         |
| <b>Single</b>                                                     | 23 (20.7) | 10 (5-12.8)                                                          | 0.4-15  | 0.24    | 1.3 (1.2-1.6)                                                    | 1.1-2.5   | 0.03    |
| <b>Composite</b>                                                  | 88 (79.3) | 7.8 (4-10)                                                           | 0.8-30  |         | 1.5 (1.4-1.7)                                                    | 1.1-4.5   |         |
| <b>Industry funding</b>                                           |           |                                                                      |         |         |                                                                  |           |         |
| <b>Yes</b>                                                        | 61 (55)   | 5.6 (3.5-10)                                                         | 0.4-30  | 0.01    | 1.5 (1.3-1.7)                                                    | 1.1-4.5   | 0.41    |
| <b>No</b>                                                         | 42 (37.8) | 10 (5-10)                                                            | 0.8-15  |         | 1.5 (1.4-1.8)                                                    | 1.1-4     |         |
| <b>Unclear/not explicitly stated</b>                              | 8 (7.2)   | 10 (10-13.4)                                                         | 5.5-15  |         | 1.4 (1.3-2.7)                                                    | 1.3-4.3   |         |
| <b>Pre- and post-2010 release of draft FDA guidance statement</b> |           |                                                                      |         |         |                                                                  |           |         |
| <b>Pre-2010</b>                                                   | 35 (31.5) | 7.9 (3.8-10)                                                         | 0.4-15  | 0.24    | 1.4 (1.2-1.7)                                                    | 1.1-4     | 0.02    |
| <b>Post-2010</b>                                                  | 76 (68.5) | 9.5 (4.5-10)                                                         | 0.8-30  |         | 1.5 (1.4-1.7)                                                    | 1.2-4.5   |         |

<sup>a</sup>Interquartile range

The differences in both absolute and relative non-inferiority margins used among medical specialties were significant. Thrombosis trials had the lowest median absolute non-inferiority margin of 3.6%. Although there was a wide range of absolute and relative non-inferiority margins used across trials, the absolute non-inferiority margins of at least one trial in every specialty was 10% or greater.

Trials with mortality as part of a composite primary outcome had significantly higher relative non-inferiority margins compared to those with mortality as a single primary outcome. In

1  
2  
3 contrast, when the non-inferiority margin was expressed as an absolute risk difference, there  
4  
5 was no significant difference in the margins between type of mortality outcome. Industry-  
6  
7 funded trials had a significantly lower median absolute non-inferiority margin compared to  
8  
9 those without industry funding.  
10  
11  
12  
13  
14

15 In this review, 35 (32%) trials were published before 2010 when the first draft FDA guidance  
16  
17 statement about non-inferiority trials was published. The relative non-inferiority margin sizes  
18  
19 were significantly larger in trials that were published after 2010. A similar trend was seen with  
20  
21 the absolute non-inferiority margin sizes, but the difference was not statistically significant.  
22  
23  
24  
25  
26  
27

### 28 **Association between trial characteristics and non-inferiority margin size**

29  
30 Table 2 shows the  $\beta$  coefficients with 95% confidence intervals (CI) from our regression analysis  
31  
32 of the association between trial characteristics and the log-transformed absolute non-inferiority  
33  
34 margin. Thrombosis trials had significantly smaller log-absolute non-inferiority margins  
35  
36 compared to trials in infectious diseases (reference group) when adjusted for pediatric patients,  
37  
38 single or composite mortality outcome and industry funding. When we analyzed the same for  
39  
40 log-transformed relative non-inferiority margins, trials related to transplant had significantly  
41  
42 larger log-relative non-inferiority margins compared to infectious diseases (Table 3).  
43  
44  
45  
46  
47  
48  
49  
50  
51  
52  
53  
54  
55  
56  
57  
58  
59  
60



**Table 2: Absolute non-inferiority margin regression analyses**

| Predictor                | Adjusted $\beta$ coefficient* | 95% CI        | p-value |
|--------------------------|-------------------------------|---------------|---------|
| <b>Specialty</b>         |                               |               |         |
| Oncology                 | 0.12                          | -0.19 to 0.43 | 0.45    |
| Cardiovascular           | -0.23                         | -0.84 to 0.39 | 0.46    |
| Thrombosis               | -1.14                         | -1.48 to -0.8 | <0.001  |
| Transplant               | 0.15                          | -0.3 to 0.6   | 0.5     |
| Other <sup>#</sup>       | 0.42                          | -0.13 to 0.98 | 0.14    |
| Infectious diseases      | 1 (reference)                 | --            | --      |
| <b>Pediatrics</b>        |                               |               |         |
| Yes                      | -0.22                         | -0.54 to 0.11 | 0.19    |
| No                       | 1 (reference)                 | --            | --      |
| <b>Mortality outcome</b> |                               |               |         |
| Single                   | -0.27                         | -0.56 to 0.02 | 0.07    |
| Composite                | 1 (reference)                 | --            | --      |
| <b>Industry funding</b>  |                               |               |         |
| Yes                      | 0.08                          | -0.19 to 0.36 | 0.55    |
| No                       | 1 (reference)                 | --            | --      |

\*Omnibus F-test: 11.93 (8, 102),  $p < 0.05$ , adjusted R-squared = 0.44

<sup>#</sup>Due to low number of trials, "Other" category combines trials in anesthesia, gastroenterology and respirology

**Table 3: Relative non-inferiority margin regression analyses**

| Predictor                | Adjusted $\beta$ coefficient* | 95% CI        | p-value |
|--------------------------|-------------------------------|---------------|---------|
| <b>Specialty</b>         |                               |               |         |
| Oncology                 | -0.08                         | -0.24 to 0.07 | 0.3     |
| Cardiovascular           | -0.23                         | -0.54 to 0.07 | 0.13    |
| Thrombosis               | 0.01                          | -0.16 to 0.18 | 0.9     |
| Transplant               | 0.24                          | 0.01 to 0.46  | 0.04    |
| Other <sup>#</sup>       | -0.13                         | -0.41 to 0.15 | 0.35    |
| Infectious diseases      | 1 (reference)                 | --            | --      |
| <b>Pediatrics</b>        |                               |               |         |
| Yes                      | 0.1                           | -0.06 to 0.26 | 0.23    |
| No                       | 1 (reference)                 | --            | --      |
| <b>Mortality outcome</b> |                               |               |         |
| Single                   | -0.11                         | -0.25 to 0.03 | 0.13    |
| Composite                | 1 (reference)                 | --            | --      |
| <b>Industry funding</b>  |                               |               |         |
| Yes                      | -0.13                         | -0.27 to 0.01 | 0.06    |
| No                       | 1 (reference)                 | --            | --      |

\*Omnibus F-test: 2.56 (8, 102),  $p < 0.05$ , adjusted R-squared = 0.1

<sup>#</sup>Due to low number of trials, "Other" category combines trials in anesthesia, gastroenterology and respirology

## DISCUSSION

We conducted a systematic review of 111 non-inferiority trials that compared pharmacological therapies where mortality was included in the primary outcome. We found that the majority of non-inferiority trials focused on thrombosis, infectious diseases and oncology. There was a wide range of non-inferiority margins used in these trials, irrespective of whether they were expressed as a measure of absolute effect or when converted to a relative effect. Our results showed that in the design of at least half of the non-inferiority trials included in this review, all of which included mortality as part of their primary outcome, a "new" drug therapy could have an absolute increase of 9% or relative increase of 50% in mortality outcomes compared to controls and still be accepted as non-inferior. Accepting the potential for this increase in

1  
2  
3 mortality while declaring non-inferiority is a challenging methodological issue in the conduct of  
4  
5 non-inferiority trials.  
6  
7  
8  
9

10 In our review, we also found that non-inferiority margins were more commonly expressed in  
11  
12 terms of absolute risk differences than in relative terms. Whether to present absolute or  
13  
14 relative non-inferiority margins is a source of debate in the design of non-inferiority trials.<sup>16</sup>  
15  
16

17 There is no clear consensus on the selection of the most appropriate effect measure but it has  
18  
19 been demonstrated that different ways of expressing effect measures could result in different  
20  
21 conclusions within the same non-inferiority trial.<sup>14,16-17</sup> Since a relative non-inferiority margin  
22  
23 accounts for the estimated baseline risk of outcome, it would be a more conservative choice  
24  
25 over an absolute margin to conclude non-inferiority should the event rate in the control group  
26  
27 be lower than expected.  
28  
29  
30  
31  
32  
33  
34

35 We detected significant variations in absolute and relative non-inferiority margin size according  
36  
37 to medical specialty which could be partially explained by differences in acuity of diseases,  
38  
39 patient age and life expectancy.<sup>18</sup> We also found that industry-funded trials had significantly  
40  
41 lower median absolute non-inferiority margins compared to those without industry funding,  
42  
43 presumably related to greater financial resources and higher capacity to support larger trials  
44  
45 that are necessary when smaller non-inferiority margins are used. However, the difference was  
46  
47 not significant when relative non-inferiority margins were compared between trials with and  
48  
49 without industry funding.  
50  
51  
52  
53  
54  
55  
56  
57  
58  
59  
60

1  
2  
3 When we compared non-inferiority margin size between trials published before and after the  
4  
5 release of the 2010 draft FDA guidance document on non-inferiority studies, we found that the  
6  
7 median non-inferiority margin in trials published after 2010 was increased rather than  
8  
9 decreased. This was significant only for relative non-inferiority margins, but not for absolute  
10  
11 non-inferiority margins. Perhaps future guidelines could generate reductions in non-inferiority  
12  
13 margins used for randomized controlled trials involving mortality, if they recommend margins  
14  
15 lower, rather than higher than the current median (<9% absolute mortality, <1.5 times relative  
16  
17 mortality).

18  
19  
20  
21  
22  
23  
24  
25 There is currently limited research in the pre-defined determinants of the size of non-inferiority  
26  
27 margins used in non-inferiority trials. Gayet-Ageron et al. conducted a survey among trialists to  
28  
29 assess the association of pre-defined trial factors and non-inferiority margins. They found that  
30  
31 lower non-inferiority margins were associated with mortality as a primary outcome, low  
32  
33 baseline risk and lower costs of new treatments. In contrast, population age group and  
34  
35 difficulties with patient recruitment did not appear to affect the choice of margin.<sup>19</sup> Because of  
36  
37 the nature of a survey study, these results were based on self-report by respondents and were  
38  
39 not necessarily reflective of actual practice when non-inferiority trials are designed and  
40  
41 conducted.

42  
43  
44  
45  
46  
47  
48  
49 In our review of published non-inferiority trials of drug therapies that included mortality as part  
50  
51 of their primary outcome, we examined for an association between non-inferiority margin size  
52  
53 and medical specialty, inclusion of pediatric patients, mortality as a single or composite  
54  
55  
56  
57  
58  
59  
60

1  
2  
3 outcome and presence of industry funding. Medical specialty was the only trial characteristic  
4 found to be significantly associated with the size of non-inferiority margins--specifically,  
5  
6 thrombosis trials were associated with smaller absolute non-inferiority margins, while  
7  
8 transplant trials were associated with larger relative non-inferiority margins.  
9  
10  
11  
12  
13  
14

15 Similar to Gayet-Ageron et al.'s<sup>19</sup> results, we found a significant correlation between the size  
16 of absolute non-inferiority margins and estimated baseline risks of outcomes in the control  
17 group. While this association was moderate ( $r_s = 0.6$ ), it suggests that larger absolute non-  
18 inferiority margins are used when estimated risks of outcome occurring in control groups are  
19 higher. As can be seen in Figure 2, this relationship appears most evident for baseline outcome  
20 risks up to approximately 20%, beyond which larger absolute non-inferiority margins are no  
21 longer associated with higher baseline risk of outcome.  
22  
23  
24  
25  
26  
27  
28  
29  
30  
31  
32  
33  
34

35 A strength of our review is the comprehensive and sensitive search for non-inferiority trials  
36 which spanned a 30-year period to ensure that virtually all non-inferiority trials with a primary  
37 outcome involving mortality would be captured. There were no limits placed on the type of  
38 medical specialty or patient population as long as a trial compared mortality between  
39 pharmacological therapies. However, we relied on authors to provide the values of non-  
40 inferiority margins and estimated risks of outcome in their sample size calculations within the  
41 publication or in their supplementary materials. The accuracy of reporting these variables was  
42 taken at face value. To enable standardized comparisons of absolute and relative non-  
43 inferiority margins to be made consistently across all trials included in the review, we omitted  
44  
45  
46  
47  
48  
49  
50  
51  
52  
53  
54  
55  
56  
57  
58  
59  
60

1  
2  
3 non-inferiority trials that used hazard ratios, odds ratios and event rate measures that either  
4  
5 changed with time or would not allow us to determine the estimated risk of outcome in the  
6  
7 control group required for analyses.  
8  
9

10  
11  
12  
13 The absolute and relative non-inferiority margins used in published trials comparing  
14  
15 medications are large, allowing conclusions of non-inferiority in the context of large differences  
16  
17 in mortality, and highly variable. Most trials utilize non-inferiority margins based on an  
18  
19 absolute risk difference, which has only a moderate association with baseline estimates of risk  
20  
21 for outcomes. With increasing popularity of non-inferiority trials, clinicians and other users of  
22  
23 the medical literature should pay close attention to the size of non-inferiority margins used in  
24  
25 these trials and consider the influence of study design parameters and inherent trial  
26  
27 characteristics when interpreting the results. A collaborative effort to develop standards for  
28  
29 the design and analyses of future non-inferiority trials would be beneficial to the scientific  
30  
31 community.  
32  
33  
34  
35  
36  
37  
38  
39  
40  
41  
42  
43  
44  
45  
46  
47  
48  
49  
50  
51  
52  
53  
54  
55  
56  
57  
58  
59  
60

**REFERENCES**

- 1 Piaggio G, Elbourne DR, Altman DG, Pocock SJ, Evans SJ; CONSORT Group. Reporting of noninferiority and equivalence randomized trials: an extension of the CONSORT statement. *JAMA* 2006;295:1152-60.
- 2 Mauri L, D'Agostino RB. Challenges in the design and interpretation of noninferiority trials. *N Engl J Med* 2017;377:1357-67.
- 3 Suda KJ, Hurley AM, McKibbin T, Motl Moroney SE. Publication of noninferiority clinical trials: changes over a 20-year interval. *Pharmacotherapy* 2011;31:833-9.
- 4 Wangge G, Klungel OH, Roes KC, de Boer A, Hoes AW, Knol MJ. Room for improvement in conducting and reporting non-inferiority randomized controlled trials on drugs: a systematic review. *PLoS ONE* 2010;5:e13550. doi:10.1371/journal.pone.0013550
- 5 Schiller P, Burchardi N, Niestroj M, Kieser M. Quality of reporting of clinical non-inferiority and equivalence randomised trials—update and extension. *Trials* 2012;13:214. <https://doi.org/10.1186/1745-6215-13-214>
- 6 Lange S, Freitag G. Choice of delta: requirements and reality—results of a systematic review. *Biom J* 2005;47:12-27.
- 7 Althunian TA, de Boer A, Klungel OH, Insani WN, Groenwold RH. Methods of defining the non-inferiority margin in randomized, double-blind controlled trials: a systematic review. *Trials* 2017;18:107. <https://doi.org/10.1186/s13063-017-1859-x>

- 1  
2  
3 8 Rehal S, Morris TP, Fielding K, Carpenter JR, Phillips PP. Non-inferiority trials: are they  
4  
5 inferior? A systematic review of reporting in major medical journals. *BMJ Open*  
6  
7 2016;6:e012594. doi: 10.1136/bmjopen-2016-012594  
8  
9
- 10 9 Schumi J, Wittes JT. Through the looking glass: understanding non-inferiority. *Trials*  
11  
12 2011;12:106. <https://doi.org/10.1186/1745-6215-12-106>  
13  
14
- 15 10 D'Agostino RB, Massaro JM, Sullivan LM. Non-inferiority trials: design concepts and issues—  
16  
17 the encounters of academic consultants in statistics. *Statist Med* 2003;22:169-86.  
18  
19
- 20 11 Aberegg SK, Hersh AM, Samore MH. Empirical consequences of current recommendations  
21  
22 for the design and interpretation of noninferiority trials. *J Gen Intern Med* 2018;33:88-96.  
23  
24
- 25 12 Hersh AM, Walter RJ, Abberegg SK. Use of mortality as an endpoint in noninferiority trials  
26  
27 may lead to ethically problematic conclusions. *J Gen Intern Med* 2019;34:618-23.  
28  
29
- 30 13 Center for Drug Evaluation and Research, Center for Biologics Evaluation and Research.  
31  
32 Non-inferiority clinical trials to establish effectiveness—guidance for industry. Silver Spring,  
33  
34 MD: Food and Drug Administration, November 2016. Available at:  
35  
36 [https://www.fda.gov/regulatory-information/search-fda-guidance-documents/non-](https://www.fda.gov/regulatory-information/search-fda-guidance-documents/non-inferiority-clinical-trials)  
37  
38 inferiority-clinical-trials  
39  
40  
41
- 42 14 Head SJ, Kaul S, Bogers AJ, Kappetein AP. Non-inferiority study design: lessons to be learned  
43  
44 from cardiovascular trials. *Eur Heart J* 2012;33:1318-24.  
45  
46
- 47 15 Moher D, Liberati A, Tetzlaff J, Altman DG; PRISMA Group. Preferred reporting items for  
48  
49 systematic reviews and meta-analyses: the PRISMA statement. *BMJ* 2009;339:b2535.  
50  
51  
52  
53  
54  
55  
56  
57  
58  
59



- 1  
2  
3 16 Abulizi X, Flandre P. Choice of treatment-effect measures when noninferiority margins  
4 originally defined in absolute difference translated into relative difference influenced the  
5 results of clinical trials. *J Clin Epidemiol* 2018;96:63-72.  
6  
7  
8  
9  
10 17 Althunian TA, de Boer A, Groenwold RHH, Klungel OH. Defining the noninferiority margin  
11 and analysing noninferiority: an overview. *Br J Clin Pharmacol* 2017;83:1636-42.  
12  
13 18 Gladstone BP, Vach W. Choice of non-inferiority (NI) margins does not protect against  
14 degradation of treatment effects on an average—an observational study of registered and  
15 published NI trials. *PLoS ONE* 2014;9:e103616. doi:10.1371/journal.pone.0103616  
16  
17  
18  
19  
20 19 Gayet-Ageron A, Agoritsas T, Rudaz S, Courvoisier D, Perneger T. The choice of the  
21 noninferiority margin in clinical trials was driven by baseline risk, type of primary outcome,  
22 and benefits of new treatment. *J Clin Epidemiol* 2015;68:1144-51.  
23  
24  
25  
26  
27  
28  
29  
30  
31  
32  
33  
34  
35  
36  
37  
38  
39  
40  
41  
42  
43  
44  
45  
46  
47  
48  
49  
50  
51  
52  
53  
54  
55  
56  
57  
58  
59  
60

## STATEMENTS

### Author contributions

SP, ND and RF drafted the study protocol. SP designed the data collection form, screened titles and abstracts, performed statistical analyses and drafted the study manuscript. SP and MU reviewed full-text articles and performed data collection. ND, MU, RF, NM, WS, JH and MS critically reviewed the final manuscript.

### Licence statement

The Submitting Author has the right to grant and does grant on behalf of all authors of the Work (as defined in the below author licence), an exclusive licence and/or a non-exclusive licence for contributions from authors who are: i) UK Crown employees; ii) where BMJ has agreed a CC-BY licence shall apply, and/or iii) in accordance with the terms applicable for US Federal Government officers or employees acting as part of their official duties; on a worldwide, perpetual, irrevocable, royalty-free basis to BMJ Publishing Group Ltd ("BMJ") its licensees and where the relevant Journal is co-owned by BMJ to the co-owners of the Journal, to publish the Work in BMJ Open and any other BMJ products and to exploit all rights, as set out in our licence.

The Submitting Author accepts and understands that any supply made under these terms is made by BMJ to the Submitting Author unless you are acting as an employee on behalf of your employer or a postgraduate student of an affiliated institution which is paying any applicable article publishing charge ("APC") for Open Access articles. Where the Submitting Author wishes to make the Work available on an Open Access basis (and intends to pay the relevant APC), the terms of reuse of such Open Access shall be governed by a Creative Commons licence – details of these licences and which Creative Commons licence will apply to this Work are set out in our licence referred to above.

### Competing interests declaration

All authors have completed the ICMJE uniform disclosure form and declare: no support from any organisation for the submitted work; no financial relationships with any organisations that might have an interest in the submitted work in the previous three years, no other relationships or activities that could appear to have influenced the submitted work.

### Ethics approval

Not required

### Funding statement

This research received no specific grant from any funding agency in the public, commercial or not-for-profit sectors. SP is supported by a SickKids Clinician-Scientist Training Program Scholarship from The Hospital for Sick Children. MU is supported by a Vanier Canada Graduate Scholarship from the Canadian Institutes of Health Research.

1  
2  
3 **Patient and public involvement statement**

4 It was not appropriate or possible to involve patients or the public in the design, or conduct, or  
5 reporting, or dissemination plans of our research.  
6  
7

8 **Data sharing statement**

9 Data and statistical code are available on request to the corresponding author.  
10  
11  
12  
13  
14  
15  
16  
17  
18  
19  
20  
21  
22  
23  
24  
25  
26  
27  
28  
29  
30  
31  
32  
33  
34  
35  
36  
37  
38  
39  
40  
41  
42  
43  
44  
45  
46  
47  
48  
49  
50  
51  
52  
53  
54  
55  
56  
57  
58  
59  
60

For peer review only

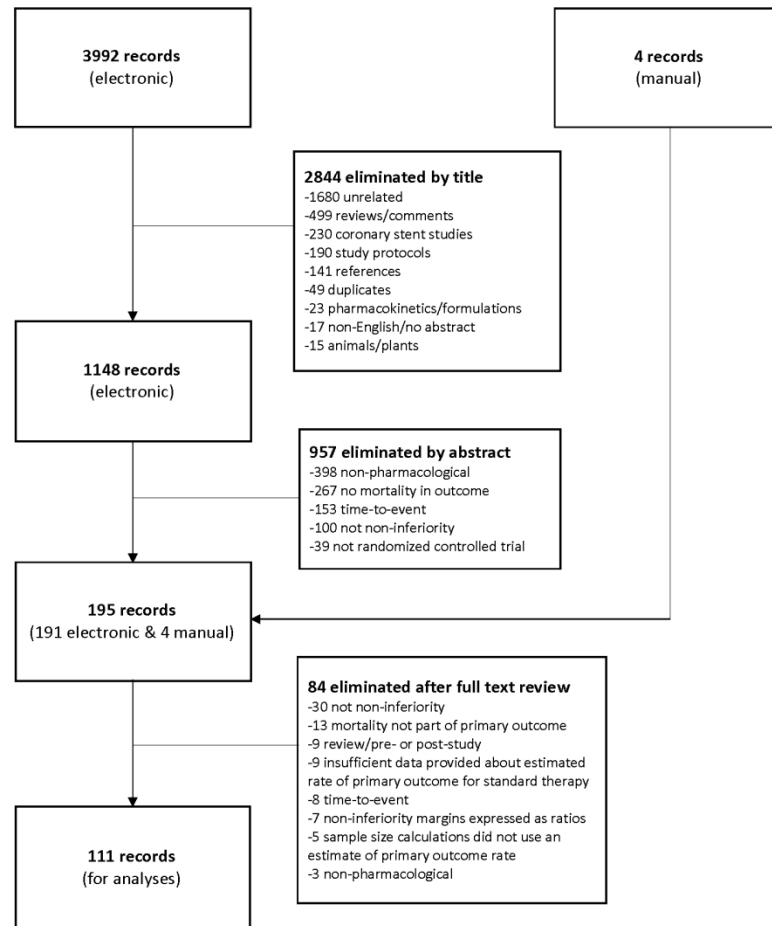Figure 1: PRISMA flow diagram<sup>14</sup>

Figure 1: PRISMA flow diagram

215x279mm (200 x 200 DPI)

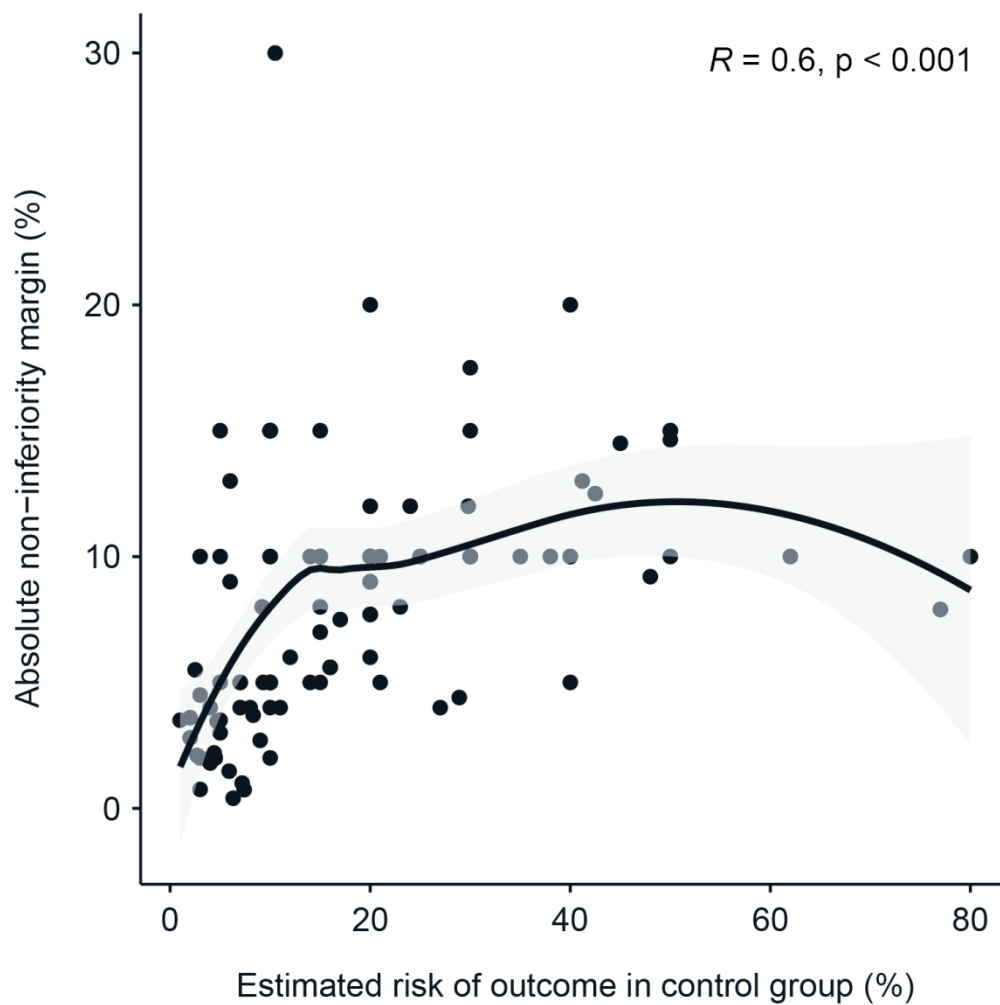

Figure 2: Association between absolute non-inferiority margins and estimated risks of outcome in control group

1  
2  
3  
4  
5  
6  
7  
8  
9  
10  
11  
12  
13  
14  
15  
16  
17  
18  
19  
20  
21  
22  
23  
24  
25  
26  
27  
28  
29  
30  
31  
32  
33  
34  
35  
36  
37  
38  
39  
40  
41  
42  
43  
44  
45  
46  
47  
48  
49  
50  
51  
52  
53  
54  
55  
56  
57  
58  
59  
60

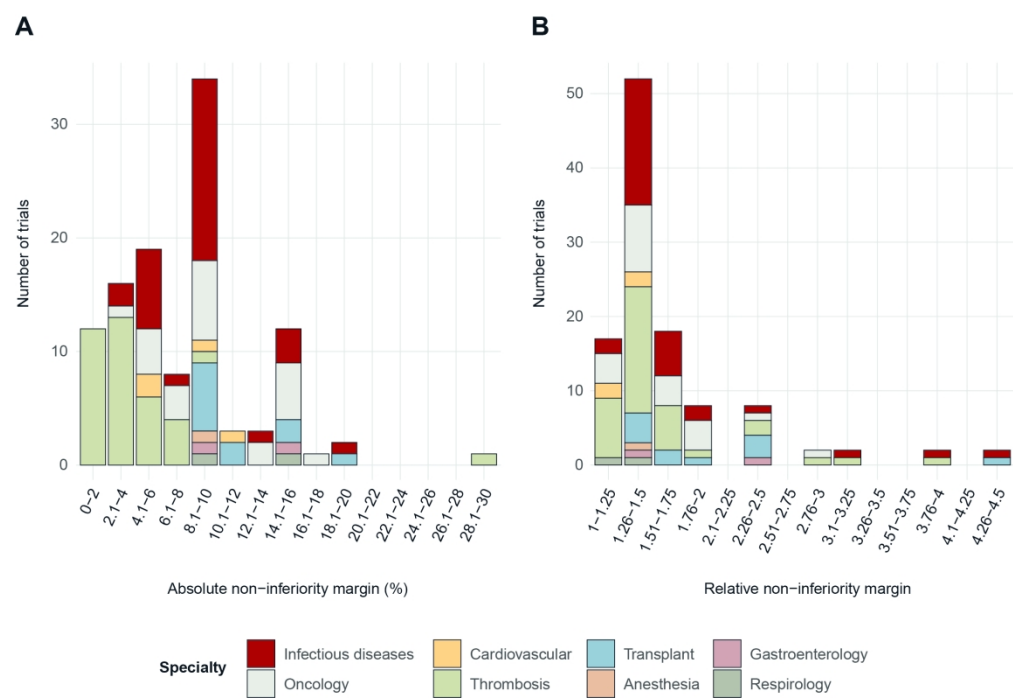

Figure 3: Distribution of absolute and relative non-inferiority margins for primary outcomes involving mortality

## Appendix A: Search strategy

### MEDLINE

|    | Searches                                                                                                                                                                                 | Results | Annotations |
|----|------------------------------------------------------------------------------------------------------------------------------------------------------------------------------------------|---------|-------------|
| 1  | equivalence trial/                                                                                                                                                                       | 503     |             |
| 2  | equivalence trials as topic/                                                                                                                                                             | 282     |             |
| 3  | (noninferiority or non-inferiority or equivalence or equivilency or equivilencies or inferiority or "NI margin*" or "delta margin*" or (prespecified adj2 margin*) or margins).ti,ab,kf. | 70165   |             |
| 4  | or/1-3                                                                                                                                                                                   | 70414   |             |
| 5  | mo.fs.                                                                                                                                                                                   | 561893  |             |
| 6  | (mortality or mortalities or death or deaths or dying or fatal*).ti,ab,kf.                                                                                                               | 1493002 |             |
| 7  | mortality/ or cause of death/ or fatal outcome/ or hospital mortality/ or infant mortality/ or maternal mortality/                                                                       | 213608  |             |
| 8  | or/5-7 [****mortality terms****]                                                                                                                                                         | 1834719 |             |
| 9  | 4 and 8 [****base clinical set****]                                                                                                                                                      | 9115    |             |
| 10 | randomized controlled trial.pt.                                                                                                                                                          | 500401  |             |
| 11 | controlled clinical trial.pt.                                                                                                                                                            | 93574   |             |
| 12 | randomized.ab.                                                                                                                                                                           | 469732  |             |
| 13 | placebo.ab.                                                                                                                                                                              | 205181  |             |
| 14 | drug therapy.fs.                                                                                                                                                                         | 2180485 |             |
| 15 | randomly.ab.                                                                                                                                                                             | 327066  |             |
| 16 | trial.ab.                                                                                                                                                                                | 494306  |             |
| 17 | groups.ab.                                                                                                                                                                               | 2008069 |             |
| 18 | or/10-17                                                                                                                                                                                 | 4632786 |             |

|    |                                                                                                                                   |         |
|----|-----------------------------------------------------------------------------------------------------------------------------------|---------|
| 19 | exp animals/ not humans.sh.                                                                                                       | 4672546 |
| 20 | 18 not 19 [****Cochrane Handbook Highly Sensitive Search Strategy for identifying randomized trials (Box 6.4.c 2008 version)****] | 4014138 |
| 21 | 9 and 20 [****Final results****]                                                                                                  | 3721    |
| 22 | limit 21 to (english language and humans and yr="1989 -Current")                                                                  | 3212    |

### Medline-in-Process

|    | Searches                                                                                                                                                                                 | Results | Annotations |
|----|------------------------------------------------------------------------------------------------------------------------------------------------------------------------------------------|---------|-------------|
| 1  | equivalenc*adj3 trial*.ti,ab,kf.                                                                                                                                                         | 0       |             |
| 2  | (noninferiority or non-inferiority or equivalence or equivilency or equivilencies or inferiority or "NI margin*" or "delta margin*" or (prespecified adj2 margin*) or margins).ti,ab,kf. | 70227   |             |
| 3  | or/1-2                                                                                                                                                                                   | 70227   |             |
| 4  | (mortality or mortalities or death or deaths or dying or fatal*).ti,ab,kf.                                                                                                               | 1493992 |             |
| 5  | 3 and 4 [****Base clinical set****]                                                                                                                                                      | 5800    |             |
| 6  | ((randomized or randomised or controlled) adj3 trial*).ti,ab,kf.                                                                                                                         | 401027  |             |
| 7  | placebo.ab.                                                                                                                                                                              | 205277  |             |
| 8  | randomly.ab.                                                                                                                                                                             | 327266  |             |
| 9  | trial.ab.                                                                                                                                                                                | 494765  |             |
| 10 | groups.ab.                                                                                                                                                                               | 2009271 |             |
| 11 | or/6-10 [****Trial terms****]                                                                                                                                                            | 2722197 |             |
| 12 | 5 and 11 [****Final results****]                                                                                                                                                         | 2313    |             |

### Medline Epubs Ahead of Print



|    | Searches                                                                   | Results | Annotations |
|----|----------------------------------------------------------------------------|---------|-------------|
| 1  | equivalenc*adj3 trial*.ti,ab,kf.                                           | 0       |             |
| 2  | (noninferiority or non-inferiority or equivalence or equivilency or        | 70227   |             |
| 3  | equivilencies or inferiority or "NI margin*" or "delta margin*" or         |         |             |
| 4  | (prespecified adj2 margin*) or margins).ti,ab,kf.                          |         |             |
| 5  | or/1-2                                                                     | 70227   |             |
| 6  | (mortality or mortalities or death or deaths or dying or fatal*).ti,ab,kf. | 1493992 |             |
| 7  | 3 and 4 [****Base clinical set****]                                        | 5800    |             |
| 8  | ((randomized or randomised or controlled) adj3 trial*).ti,ab,kf.           | 401027  |             |
| 9  | placebo.ab.                                                                | 205277  |             |
| 10 | randomly.ab.                                                               | 327266  |             |
| 11 | trial.ab.                                                                  | 494765  |             |
| 12 | groups.ab.                                                                 | 2009271 |             |
| 13 | or/6-10 [***Trial terms***]                                                | 2722197 |             |
| 14 | 5 and 11 [****Final results****]                                           | 2313    |             |
| 15 | equivalenc*adj3 trial*.ti,ab,kf.                                           | 0       |             |
| 16 | (noninferiority or non-inferiority or equivalence or equivilency or        | 70227   |             |
| 17 | equivilencies or inferiority or "NI margin*" or "delta margin*" or         |         |             |
| 18 | (prespecified adj2 margin*) or margins).ti,ab,kf.                          |         |             |
| 19 | or/13-14                                                                   | 70227   |             |
| 20 | (mortality or mortalities or death or deaths or dying or fatal*).ti,ab,kf. | 1493992 |             |
| 21 | 15 and 16 [****Base clinical set****]                                      | 5800    |             |
| 22 | ((randomized or randomised or controlled) adj3 trial*).ti,ab,kf.           | 401027  |             |
| 23 | placebo.ab.                                                                | 205277  |             |

|    |                                   |         |
|----|-----------------------------------|---------|
| 20 | randomly.ab.                      | 327266  |
| 21 | trial.ab.                         | 494765  |
| 22 | groups.ab.                        | 2009271 |
| 23 | or/18-22 [***Trial terms***]      | 2722197 |
| 24 | 17 and 23 [****Final results****] | 2313    |

### Embase Classic+Embase databases (OvidSP)

|    | Searches                                                                                                                                                                                       | Results | Annotations |
|----|------------------------------------------------------------------------------------------------------------------------------------------------------------------------------------------------|---------|-------------|
| 1  | equivalenc*adj3 trial*.ti,ab,kf.                                                                                                                                                               | 0       |             |
| 2  | (noninferiority or non-inferiority or equivalence or equivalency or<br>equivilencies or inferiority or "NI margin*" or "delta margin*" or<br>(prespecified adj2 margin*) or margins).ti,ab,kf. | 70227   |             |
| 3  | or/1-2                                                                                                                                                                                         | 70227   |             |
| 4  | (mortality or mortalities or death or deaths or dying or fatal*).ti,ab,kf.                                                                                                                     | 1493992 |             |
| 5  | 3 and 4 [****Base clinical set****]                                                                                                                                                            | 5800    |             |
| 6  | ((randomized or randomised or controlled) adj3 trial*).ti,ab,kf.                                                                                                                               | 401027  |             |
| 7  | placebo.ab.                                                                                                                                                                                    | 205277  |             |
| 8  | randomly.ab.                                                                                                                                                                                   | 327266  |             |
| 9  | trial.ab.                                                                                                                                                                                      | 494765  |             |
| 10 | groups.ab.                                                                                                                                                                                     | 2009271 |             |
| 11 | or/6-10 [***Trial terms***]                                                                                                                                                                    | 2722197 |             |
| 12 | 5 and 11 [****Final results****]                                                                                                                                                               | 2313    |             |
| 13 | equivalenc*adj3 trial*.ti,ab,kf.                                                                                                                                                               | 0       |             |

|    |    |                                                                            |
|----|----|----------------------------------------------------------------------------|
| 1  |    |                                                                            |
| 2  |    |                                                                            |
| 3  |    |                                                                            |
| 4  | 14 | (noninferiority or non-inferiority or equivalence or equivalency or        |
| 5  |    | equivilencies or inferiority or "NI margin*" or "delta margin*" or         |
| 6  |    | (prespecified adj2 margin*) or margins).ti,ab,kf.                          |
| 7  |    |                                                                            |
| 8  | 15 | or/13-14                                                                   |
| 9  |    | 70227                                                                      |
| 10 |    |                                                                            |
| 11 | 16 | (mortality or mortalities or death or deaths or dying or fatal*).ti,ab,kf. |
| 12 |    | 1493992                                                                    |
| 13 |    |                                                                            |
| 14 | 17 | 15 and 16 [****Base clinical set****]                                      |
| 15 |    | 5800                                                                       |
| 16 | 18 | ((randomized or randomised or controlled) adj3 trial*).ti,ab,kf.           |
| 17 |    | 401027                                                                     |
| 18 | 19 | placebo.ab.                                                                |
| 19 |    | 205277                                                                     |
| 20 | 20 | randomly.ab.                                                               |
| 21 |    | 327266                                                                     |
| 22 |    |                                                                            |
| 23 | 21 | trial.ab.                                                                  |
| 24 |    | 494765                                                                     |
| 25 | 22 | groups.ab.                                                                 |
| 26 |    | 2009271                                                                    |
| 27 |    |                                                                            |
| 28 | 23 | or/18-22 [***Trial terms***]                                               |
| 29 |    | 2722197                                                                    |
| 30 | 24 | 17 and 23 [****Final results****]                                          |
| 31 |    | 2313                                                                       |
| 32 | 25 | (equivalen* adj2 trial*).ti,ab.                                            |
| 33 |    | 758                                                                        |
| 34 |    |                                                                            |
| 35 | 26 | (noninferiority or non-inferiority or equivalence or equivalency or        |
| 36 |    | equivilencies or inferiority or "NI margin*" or "delta margin*" or         |
| 37 |    | (prespecified adj2 margin*) or margins).ti,ab.                             |
| 38 |    |                                                                            |
| 39 | 27 | or/25-26 [***equivalency or non-inferiority terms****]                     |
| 40 |    | 69985                                                                      |
| 41 |    |                                                                            |
| 42 | 28 | (mortality or mortalities or death or deaths or dying or fatal*).ti,ab.    |
| 43 |    | 1473665                                                                    |
| 44 | 29 | mortality/ or cancer mortality/ or childhood mortality/ or embryo          |
| 45 |    | mortality/ or fetus mortality/ or infant mortality/ or maternal mortality/ |
| 46 |    | or prenatal mortality/ or surgical mortality/ or perinatal mortality/ or   |
| 47 |    | newborn mortality/                                                         |
| 48 |    |                                                                            |
| 49 |    |                                                                            |
| 50 |    |                                                                            |
| 51 | 30 | death/ or "cause of death"/ or dying/ or heart death/ or sudden death/     |
| 52 |    | 75385                                                                      |
| 53 |    | or child death/ or newborn death/                                          |
| 54 | 31 | or/28-30 [****mortality terms****]                                         |
| 55 |    | 1511412                                                                    |
| 56 |    |                                                                            |
| 57 |    |                                                                            |
| 58 |    |                                                                            |
| 59 |    |                                                                            |
| 60 |    |                                                                            |

1  
2  
3  
4  
5  
6  
7  
8  
9  
10  
11  
12  
13  
14  
15  
16  
17  
18  
19  
20  
21  
22  
23  
24  
25  
26  
27  
28  
29  
30  
31  
32  
33  
34  
35  
36  
37  
38  
39  
40  
41  
42  
43  
44  
45  
46  
47  
48  
49  
50  
51  
52  
53  
54  
55  
56  
57  
58  
59  
60

|    |                                                                                                         |         |
|----|---------------------------------------------------------------------------------------------------------|---------|
| 32 | 27 and 31 [****Base clinical set****]                                                                   | 5823    |
| 33 | randomized controlled trial/                                                                            | 500622  |
| 34 | double-blind procedure/                                                                                 | 0       |
| 35 | single-blind procedure/                                                                                 | 0       |
| 36 | crossover-procedure/                                                                                    | 0       |
| 37 | random*.ti,ab,kw.                                                                                       | 1109854 |
| 38 | factorial*.ti,ab,kw.                                                                                    | 29313   |
| 39 | crossover*.ti,ab,kw.                                                                                    | 62938   |
| 40 | "cross over".ti,ab,kw.                                                                                  | 22789   |
| 41 | "cross-over*".ti,ab,kw.                                                                                 | 23015   |
| 42 | placebo*.ti,ab,kw.                                                                                      | 212808  |
| 43 | (doubl* adj5 blind*).ti,ab,kw.                                                                          | 149043  |
| 44 | (singl* adj5 blind*).ti,ab,kw.                                                                          | 22640   |
| 45 | assign*.ti,ab,kw.                                                                                       | 308920  |
| 46 | allocat*.ti,ab,kw.                                                                                      | 115873  |
| 47 | volunteer*.ti,ab,kw.                                                                                    | 189496  |
| 48 | or/33-47 [****Cochrane Box 6.3.2.2 EMBASE sensitive<br>TherapyTreatment Effectiveness Filter terms****] | 1731635 |
| 49 | 32 and 48 [***Cochrane trial filter****]                                                                | 1802    |
| 50 | ct.fs.                                                                                                  | 0       |
| 51 | 32 and 50 [***clinical trial subheading****]                                                            | 0       |
| 52 | limit 32 to (randomized controlled trial or controlled clinical trial or<br>multicenter study)          | 1230    |

|    |    |                                                                               |
|----|----|-------------------------------------------------------------------------------|
| 1  |    |                                                                               |
| 2  |    |                                                                               |
| 3  |    |                                                                               |
| 4  | 53 | or/49,51-52 [****Final results****] 1974                                      |
| 5  |    |                                                                               |
| 6  | 54 | limit 53 to conference abstract [Limit not valid in Ovid MEDLINE(R),Ovid 1974 |
| 7  |    | MEDLINE(R) Daily Update,Ovid MEDLINE(R) In-Process,Ovid MEDLINE(R)            |
| 8  |    | Publisher; records were retained]                                             |
| 9  |    |                                                                               |
| 10 |    |                                                                               |
| 11 | 55 | 53 not 54 [***Conference abstracts removed****] 0                             |
| 12 |    |                                                                               |
| 13 | 56 | limit 55 to (human and english language and yr="1989 -Current") 0             |
| 14 |    |                                                                               |
| 15 |    |                                                                               |
| 16 |    |                                                                               |
| 17 |    |                                                                               |
| 18 |    |                                                                               |
| 19 |    |                                                                               |
| 20 |    |                                                                               |
| 21 |    |                                                                               |
| 22 |    |                                                                               |
| 23 |    |                                                                               |
| 24 |    |                                                                               |
| 25 |    |                                                                               |
| 26 |    |                                                                               |
| 27 |    |                                                                               |
| 28 |    |                                                                               |
| 29 |    |                                                                               |
| 30 |    |                                                                               |
| 31 |    |                                                                               |
| 32 |    |                                                                               |
| 33 |    |                                                                               |
| 34 |    |                                                                               |
| 35 |    |                                                                               |
| 36 |    |                                                                               |
| 37 |    |                                                                               |
| 38 |    |                                                                               |
| 39 |    |                                                                               |
| 40 |    |                                                                               |
| 41 |    |                                                                               |
| 42 |    |                                                                               |
| 43 |    |                                                                               |
| 44 |    |                                                                               |
| 45 |    |                                                                               |
| 46 |    |                                                                               |
| 47 |    |                                                                               |
| 48 |    |                                                                               |
| 49 |    |                                                                               |
| 50 |    |                                                                               |
| 51 |    |                                                                               |
| 52 |    |                                                                               |
| 53 |    |                                                                               |
| 54 |    |                                                                               |
| 55 |    |                                                                               |
| 56 |    |                                                                               |
| 57 |    |                                                                               |
| 58 |    |                                                                               |
| 59 |    |                                                                               |
| 60 |    |                                                                               |

## Appendix B: Non-inferiority trials

| Author                                         | Year | Country       | Specialty           | Pediatric patients included | Mortality as single or composite outcome | Industry funding     | Conclusion       | Estimated risk of event in control (%) | Observed event in control (%) | Absolute non-inferiority margin (% difference) | Relative non-inferiority margin |
|------------------------------------------------|------|---------------|---------------------|-----------------------------|------------------------------------------|----------------------|------------------|----------------------------------------|-------------------------------|------------------------------------------------|---------------------------------|
| African Neonatal Sepsis Trial (AFRINEST) group | 2015 | international | infectious diseases | yes                         | composite                                | no                   | non-inferior     | 10                                     | 8                             | 5                                              | 1.5                             |
| Ahn et al.                                     | 2013 | Korea         | oncology            | no                          | single                                   | not explicit/unclear | non-inferior     | 41.2                                   | 23                            | 13                                             | 1.32                            |
| Aliberti et al.                                | 2017 | Italy         | infectious diseases | no                          | composite                                | no                   | stopped early    | 10                                     | 7.4                           | 5                                              | 1.5                             |
| Baqui et al.                                   | 2015 | Bangladesh    | infectious diseases | yes                         | composite                                | no                   | non-inferior     | 10                                     | 10                            | 5                                              | 1.5                             |
| Bertrand et al.                                | 2006 | Canada        | thrombosis          | no                          | composite                                | yes                  | non-inferior     | 23                                     | 18.2                          | 8                                              | 1.35                            |
| Beyer-Westendorf et al.                        | 2017 | Germany       | thrombosis          | no                          | composite                                | yes                  | non-inferior     | 3                                      | 1.7                           | 4.5                                            | 2.5                             |
| Borchmann et al.                               | 2017 | international | oncology            | no                          | composite                                | yes                  | non-inferior     | 12                                     | 8.8                           | 6                                              | 1.5                             |
| Brack et al.                                   | 2012 | international | infectious diseases | yes                         | composite                                | yes                  | not non-inferior | 1                                      | 2.9                           | 3.5                                            | 4.5                             |
| Budde et al.                                   | 2014 | international | transplant          | no                          | composite                                | yes                  | non-inferior     | 15                                     | 19.6                          | 10                                             | 1.67                            |
| The Matisse Investigators                      | 2003 | international | thrombosis          | no                          | composite                                | yes                  | non-inferior     | 5                                      | 5                             | 3.5                                            | 1.7                             |
| Bunnapradist et al.                            | 2013 | international | transplant          | no                          | composite                                | yes                  | non-inferior     | 6                                      | 2.5                           | 9                                              | 2.5                             |
| Cai et al.                                     | 2014 | China         | transplant          | no                          | composite                                | yes                  | non-inferior     | 20                                     | 16.7                          | 20                                             | 2                               |
| Chastre et al.                                 | 2003 | France        | infectious diseases | no                          | single                                   | no                   | non-inferior     | 40                                     | 17.2                          | 10                                             | 1.25                            |
| Cordonnier et al.                              | 2009 | France        | infectious diseases | no                          | single                                   | no                   | non-inferior     | 9.2                                    | 2.7                           | 8                                              | 1.87                            |
| de Kraker et al.                               | 2004 | international | oncology            | yes                         | composite                                | no                   | non-inferior     | 15                                     | 8.6                           | 10                                             | 1.67                            |
| De Simone et al.                               | 2012 | international | transplant          | no                          | composite                                | yes                  | non-inferior     | 24                                     | 9.5                           | 12                                             | 1.5                             |
| Diener et al.                                  | 2006 | international | thrombosis          | no                          | composite                                | yes                  | non-inferior     | 9.3                                    | 8.8                           | 5                                              | 1.54                            |
| Eckardt et al.                                 | 2006 | international | oncology            | no                          | single                                   | yes                  | non-inferior     | 62                                     | 69                            | 10                                             | 1.16                            |
| Eriksson et al.                                | 2011 | international | thrombosis          | no                          | composite                                | yes                  | non-inferior     | 20                                     | 8.8                           | 7.7                                            | 1.39                            |
| Eriksson et al.                                | 2007 | international | thrombosis          | no                          | composite                                | yes                  | non-inferior     | 48                                     | 37.7                          | 9.2                                            | 1.19                            |

|                    |      |               |                     |              |           |                      |                  |      |      |      |      |
|--------------------|------|---------------|---------------------|--------------|-----------|----------------------|------------------|------|------|------|------|
| Eriksson et al.    | 2007 | international | thrombosis          | no           | composite | yes                  | non-inferior     | 20   | 6.7  | 7.7  | 1.39 |
| Feres et al.       | 2013 | Brazil        | thrombosis          | no           | composite | yes                  | non-inferior     | 9    | 5.8  | 2.7  | 1.3  |
| Ferme et al.       | 2017 | international | oncology            | yes          | composite | no                   | non-inferior     | 10   | 10.1 | 10   | 2    |
| Gaston et al.      | 2009 | US            | transplant          | yes          | composite | yes                  | non-inferior     | 20   | 27.9 | 10   | 1.5  |
| Giamarellou et al. | 2000 | Greece        | infectious diseases | no           | composite | not explicit/unclear | non-inferior     | 25   | 49.2 | 10   | 1.4  |
| Gilard et al.      | 2015 | international | thrombosis          | no           | composite | yes                  | non-inferior     | 3    | 1.5  | 2    | 1.67 |
| Gulizia et al.     | 2008 | Italy         | cardiology          | no           | composite | not explicit/unclear | non-inferior     | 38   | 40   | 10   | 1.26 |
| Gwon et al.        | 2012 | Korea         | thrombosis          | no           | composite | yes                  | non-inferior     | 10   | 4.3  | 4    | 1.4  |
| Sibbing et al.     | 2017 | international | thrombosis          | no           | composite | yes                  | non-inferior     | 10.5 | 9    | 30   | 3.86 |
| Han et al.         | 2016 | China         | thrombosis          | no           | composite | yes                  | non-inferior     | 8.3  | 5.9  | 3.7  | 1.45 |
| Harris et al.      | 2018 | international | infectious diseases | no           | single    | no                   | not non-inferior | 14   | 3.7  | 5    | 1.36 |
| Hofheinz et al.    | 2012 | Germany       | oncology            | no           | single    | yes                  | non-inferior     | 42.5 | 33   | 12.5 | 1.29 |
| Huh et al.         | 2017 | Korea         | transplant          | no           | composite | yes                  | non-inferior     | 10   | 13.3 | 15   | 2.5  |
| Iversen et al.     | 2019 | Denmark       | infectious diseases | no           | composite | no                   | non-inferior     | 10   | 12.1 | 10   | 2    |
| Jeng et al.        | 2018 | international | transplant          | no           | composite | yes                  | non-inferior     | 20   | 5.8  | 12   | 1.6  |
| Johnson et al.     | 2016 | international | oncology            | no           | composite | no                   | not non-inferior | 5    | 14.3 | 5    | 2    |
| Jones et al.       | 2016 | Canada        | anesthesia          | no           | composite | no                   | non-inferior     | 25   | 30   | 10   | 1.4  |
| Kim et al.         | 2012 | Korea         | thrombosis          | no           | composite | yes                  | non-inferior     | 11   | 4.7  | 4    | 1.36 |
| Park et al.        | 2013 | Korea         | thrombosis          | no           | composite | no                   | non-inferior     | 3    | 1.4  | 0.75 | 1.25 |
| Hahn et al.        | 2018 | Korea         | thrombosis          | no           | composite | yes                  | non-inferior     | 4.5  | 4.2  | 2    | 1.44 |
| Kirchhof et al.    | 2012 | Germany       | cardiology          | no           | composite | yes                  | not non-inferior | 29.8 | na   | 12   | 1.4  |
| Kirchhof et al.    | 2018 | international | thrombosis          | no           | composite | no                   | non-inferior     | 17   | 7.3  | 7.5  | 1.44 |
| Kutner et al.      | 2015 | US            | cardiology          | no           | single    | no                   | not non-inferior | 21   | 20.3 | 5    | 1.24 |
| Le et al.          | 2017 | Vietnam       | infectious diseases | no           | single    | no                   | non-inferior     | 15   | 6.5  | 10   | 1.67 |
| Lee et al.         | 2018 | Korea         | thrombosis          | no           | composite | yes                  | non-inferior     | 7    | 0.6  | 4    | 1.57 |
| Lee et al.         | 2009 | UK            | oncology            | not explicit | single    | no                   | non-inferior     | 80   | 69   | 10   | 1.13 |

|    |                         |      |               |                     |     |           |                      |                  |     |       |      |      |
|----|-------------------------|------|---------------|---------------------|-----|-----------|----------------------|------------------|-----|-------|------|------|
| 1  | Liu et al.              | 2013 | China         | oncology            | yes | single    | no                   | stopped early    | 15  | na    | 15   | 2    |
| 2  | Maertens et al.         | 2016 | international | infectious diseases | no  | single    | yes                  | non-inferior     | 20  | 20    | 10   | 1.5  |
| 3  | Mai et al.              | 2016 | international | oncology            | no  | composite | yes                  | non-inferior     | 50  | na    | 15   | 1.3  |
| 4  | Matsumura-Nakano et al. | 2019 | Japan         | thrombosis          | no  | composite | yes                  | not non-inferior | 8   | 13.6  | 4    | 1.5  |
| 5  | Mavroudis et al.        | 2016 | Greece        | oncology            | no  | composite | no                   | not non-inferior | 15  | 10.5  | 7    | 1.47 |
| 6  | Mavroudis et al.        | 2015 | Greece        | oncology            | no  | composite | no                   | not non-inferior | 15  | 4.3   | 8    | 1.53 |
| 7  | Merle et al.            | 2014 | international | infectious diseases | no  | composite | no                   | not non-inferior | 20  | 17.2  | 6    | 1.3  |
| 8  | Mesu et al.             | 2018 | international | infectious diseases | yes | composite | no                   | non-inferior     | 6   | 2.4   | 13   | 3.17 |
| 9  | Meynard et al.          | 2018 | France        | infectious diseases | no  | composite | yes                  | not non-inferior | 15  | 29    | 10   | 1.67 |
| 10 | Mir et al.              | 2017 | Pakistan      | infectious diseases | yes | composite | no                   | non-inferior     | 10  | 11.8  | 5    | 1.5  |
| 11 | Molloy et al.           | 2018 | international | infectious diseases | no  | single    | no                   | non-inferior     | 15  | 21.4  | 10   | 1.67 |
| 12 | Nakamura et al.         | 2017 | Japan         | thrombosis          | no  | composite | no                   | non-inferior     | 4.5 | 1.5   | 2    | 1.44 |
| 13 | Nathan et al.           | 2005 | Niger         | infectious diseases | yes | composite | no                   | non-inferior     | 15  | 9     | 10   | 1.67 |
| 14 | Park et al.             | 2014 | Korea         | gastroenterology    | no  | single    | no                   | not non-inferior | 10  | na    | 15   | 2.5  |
| 15 | Paul et al.             | 2015 | Israel        | infectious diseases | no  | composite | no                   | not non-inferior | 30  | 27    | 15   | 1.5  |
| 16 | Ponticelli et al.       | 2014 | Italy         | transplant          | no  | composite | not explicit/unclear | inconclusive     | 3   | 2.8   | 10   | 4.33 |
| 17 | Postma et al.           | 2015 | Netherlands   | infectious diseases | no  | single    | no                   | non-inferior     | 5   | na    | 3    | 1.6  |
| 18 | Pritchard-Jones et al.  | 2015 | international | oncology            | yes | composite | no                   | non-inferior     | 14  | 7.4   | 10   | 1.71 |
| 19 | Pujade-Lauraine et al.  | 2010 | international | oncology            | no  | composite | yes                  | non-inferior     | 77  | 80    | 7.9  | 1.1  |
| 20 | Qazi et al.             | 2017 | international | transplant          | no  | composite | yes                  | not non-inferior | 25  | 20.4  | 10   | 1.4  |
| 21 | Reynolds et al.         | 2010 | Uganda        | infectious diseases | no  | composite | no                   | non-inferior     | 5   | 29.8  | 15   | 4    |
| 22 | Riess et al.            | 2010 | Germany       | thrombosis          | no  | composite | yes                  | non-inferior     | 4.7 | 4.52  | 3.45 | 1.73 |
| 23 | Russ et al.             | 2013 | international | transplant          | no  | composite | yes                  | unclear          | 10  | 14    | 15   | 2.5  |
| 24 | Schrappe et al.         | 2018 | international | oncology            | yes | composite | no                   | not non-inferior | 4   | 4.4   | 4    | 2    |
| 25 | Schroder et al.         | 2004 | international | oncology            | no  | single    | no                   | inconclusive     | 50  | 24.04 | 15   | 1.3  |
| 26 |                         |      |               |                     |     |           |                      |                  |     |       |      |      |
| 27 |                         |      |               |                     |     |           |                      |                  |     |       |      |      |
| 28 |                         |      |               |                     |     |           |                      |                  |     |       |      |      |
| 29 |                         |      |               |                     |     |           |                      |                  |     |       |      |      |
| 30 |                         |      |               |                     |     |           |                      |                  |     |       |      |      |
| 31 |                         |      |               |                     |     |           |                      |                  |     |       |      |      |
| 32 |                         |      |               |                     |     |           |                      |                  |     |       |      |      |
| 33 |                         |      |               |                     |     |           |                      |                  |     |       |      |      |
| 34 |                         |      |               |                     |     |           |                      |                  |     |       |      |      |
| 35 |                         |      |               |                     |     |           |                      |                  |     |       |      |      |
| 36 |                         |      |               |                     |     |           |                      |                  |     |       |      |      |
| 37 |                         |      |               |                     |     |           |                      |                  |     |       |      |      |
| 38 |                         |      |               |                     |     |           |                      |                  |     |       |      |      |
| 39 |                         |      |               |                     |     |           |                      |                  |     |       |      |      |
| 40 |                         |      |               |                     |     |           |                      |                  |     |       |      |      |
| 41 |                         |      |               |                     |     |           |                      |                  |     |       |      |      |
| 42 |                         |      |               |                     |     |           |                      |                  |     |       |      |      |
| 43 |                         |      |               |                     |     |           |                      |                  |     |       |      |      |
| 44 |                         |      |               |                     |     |           |                      |                  |     |       |      |      |
| 45 |                         |      |               |                     |     |           |                      |                  |     |       |      |      |
| 46 |                         |      |               |                     |     |           |                      |                  |     |       |      |      |
| 47 |                         |      |               |                     |     |           |                      |                  |     |       |      |      |



|                           |      |               |                     |              |           |                      |                  |     |       |       |      |
|---------------------------|------|---------------|---------------------|--------------|-----------|----------------------|------------------|-----|-------|-------|------|
| Schulz-Schupke et al.     | 2015 | international | thrombosis          | no           | composite | yes                  | stopped early    | 10  | 1.6   | 2     | 1.2  |
| Tedesco Silva et al.      | 2010 | international | transplant          | no           | composite | yes                  | non-inferior     | 20  | 24.2  | 10    | 1.5  |
| Sinha et al.              | 2005 | international | respirology         | yes          | single    | yes                  | non-inferior     | 45  | na    | 14.5  | 1.32 |
| Stabile et al.            | 2008 | Italy         | thrombosis          | not explicit | composite | not explicit/unclear | non-inferior     | 2.5 | 3.7   | 5.5   | 3.2  |
| Stellbrink et al.         | 2004 | Germany       | thrombosis          | no           | composite | yes                  | non-inferior     | 4   | 4.8   | 2     | 1.5  |
| Stets et al.              | 2019 | international | infectious diseases | no           | composite | yes                  | non-inferior     | 21  | 17.3  | 10    | 1.48 |
| Stone et al.              | 2007 | international | thrombosis          | no           | composite | yes                  | not non-inferior | 5.9 | 7.1   | 1.48  | 1.25 |
| Swaminathan et al.        | 2011 | India         | infectious diseases | no           | composite | no                   | not non-inferior | 10  | 15    | 15    | 2.5  |
| The GUSTO V Investigators | 2001 | international | thrombosis          | no           | single    | yes                  | non-inferior     | 7.4 | 5.9   | 0.74  | 1.1  |
| Turpie et al.             | 2009 | international | thrombosis          | no           | composite | yes                  | non-inferior     | 27  | 10.1  | 4     | 1.15 |
| Walsh et al.              | 2004 | international | infectious diseases | yes          | composite | yes                  | non-inferior     | 50  | 66.3  | 10    | 1.2  |
| Willenheimer et al.       | 2005 | international | cardiology          | no           | composite | yes                  | not non-inferior | 40  | 36.8  | 5     | 1.13 |
| Yahav et al.              | 2019 | international | infectious diseases | no           | composite | not explicit/unclear | non-inferior     | 35  | 48.3  | 10    | 1.29 |
| Yakoub-Agha et al.        | 2012 | international | oncology            | no           | single    | not explicit/unclear | inconclusive     | 50  | 27.2  | 14.64 | 1.29 |
| Yang et al.               | 2018 | China         | oncology            | yes          | composite | no                   | non-inferior     | 5   | na    | 10    | 3    |
| Daniels et al.            | 2019 | South Africa  | infectious diseases | yes          | composite | no                   | non-inferior     | 7   | 11.4  | 5     | 1.71 |
| Cisneros et al.           | 2019 | international | infectious diseases | no           | single    | no                   | not non-inferior | 20  | 25.3  | 10    | 1.5  |
| Hahn et al.               | 2019 | Korea         | thrombosis          | no           | composite | yes                  | non-inferior     | 4   | 2.5   | 1.8   | 1.45 |
| Jain et al.               | 2019 | India         | respirology         | yes          | composite | no                   | not non-inferior | 40  | 39.1  | 10    | 1.25 |
| Kollef et al.             | 2019 | international | infectious diseases | no           | single    | yes                  | non-inferior     | 20  | 25.3  | 10    | 1.5  |
| Nunn et al.               | 2019 | international | infectious diseases | no           | composite | no                   | non-inferior     | 30  | 20.2  | 10    | 1.33 |
| Watanabe et al.           | 2019 | Japan         | thrombosis          | not explicit | composite | yes                  | non-inferior     | 4.4 | 3.7   | 2.2   | 1.5  |
| Charbonnier et al.        | 1998 | international | thrombosis          | no           | composite | yes                  | non-inferior     | 7   | 7.2   | 5     | 1.71 |
| Colombo et al.            | 2014 | international | thrombosis          | no           | composite | yes                  | non-inferior     | 4.5 | 3.7   | 2     | 1.44 |
| Lassen et al.             | 2010 | international | thrombosis          | not explicit | composite | yes                  | non-inferior     | 16  | 24.37 | 5.6   | 1.35 |

|                                                                                            |      |               |                     |              |           |                      |                  |      |       |      |      |
|--------------------------------------------------------------------------------------------|------|---------------|---------------------|--------------|-----------|----------------------|------------------|------|-------|------|------|
| Lassen et al.                                                                              | 2009 | international | thrombosis          | no           | composite | yes                  | not non-inferior | 16   | 8.8   | 5.6  | 1.35 |
| Le Deley et al.                                                                            | 2014 | international | oncology            | yes          | composite | no                   | inconclusive     | 30   | 21.8  | 10   | 1.33 |
| Noguchi et al.                                                                             | 2016 | international | oncology            | no           | composite | yes                  | non-inferior     | 30   | 39.8  | 17.5 | 1.58 |
| Patte et al.                                                                               | 1991 | international | oncology            | yes          | composite | not explicit/unclear | non-inferior     | 10   | 10.7  | 15   | 2.5  |
| Platzbecker et al.                                                                         | 2017 | international | oncology            | no           | composite | no                   | non-inferior     | 15   | 13.2  | 5    | 1.33 |
| Raffi et al.                                                                               | 2014 | international | infectious diseases | no           | composite | yes                  | non-inferior     | 20   | 13.8  | 9    | 1.45 |
| Rubinstein et al.                                                                          | 2011 | international | infectious diseases | no           | composite | yes                  | non-inferior     | 40   | 40.5  | 20   | 1.5  |
| Schulman et al.                                                                            | 2009 | international | thrombosis          | no           | composite | yes                  | non-inferior     | 2    | 2.1   | 3.6  | 2.8  |
| Schulman et al.                                                                            | 2013 | international | thrombosis          | no           | composite | yes                  | non-inferior     | 2    | 1.3   | 2.8  | 2.4  |
| Seo et al.                                                                                 | 2014 | Korea         | gastroenterology    | yes          | composite | no                   | non-inferior     | 30   | na    | 10   | 1.33 |
| Continuous Infusion versus Double-Bolus Administration of Alteplase (COBALT) Investigators | 1997 | international | thrombosis          | not explicit | single    | yes                  | not non-inferior | 6.3  | 7.53  | 0.4  | 1.06 |
| Assessment of the Safety and Efficacy of a New Thrombolytic (ASSENT-2) Investigators       | 1999 | international | thrombosis          | no           | single    | yes                  | non-inferior     | 7.2  | 6.151 | 1    | 1.14 |
| Vilas-Boas et al.                                                                          | 2014 | Brazil        | infectious diseases | yes          | composite | no                   | non-inferior     | 20   | 23    | 9    | 1.45 |
| International Joint Efficacy Comparison of Thrombolytics (INJECT)                          | 1995 | international | thrombosis          | no           | single    | yes                  | non-inferior     | 2.7  | 9.53  | 2.1  | 1.78 |
| Nitz et al.                                                                                | 2019 | Germany       | oncology            | no           | composite | yes                  | non-inferior     | 28.9 | 10.2  | 4.4  | 1.15 |

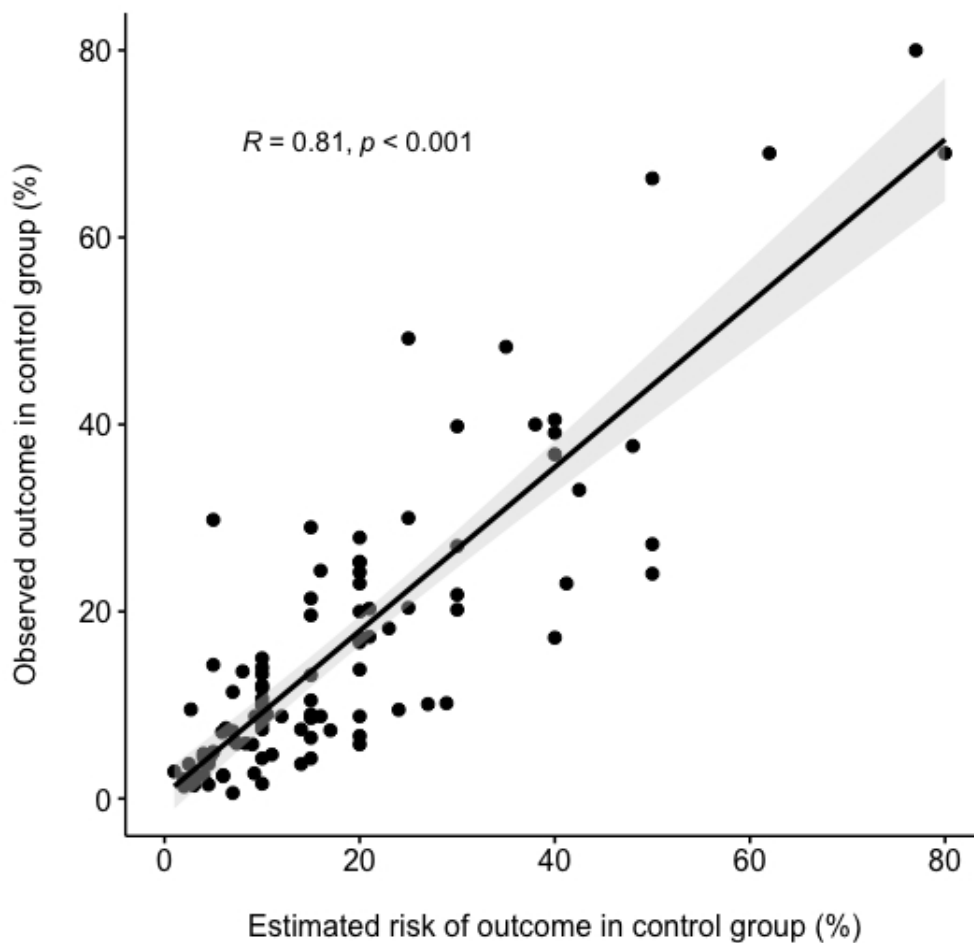

Appendix C: Relationship between observed outcomes and estimated risks of outcome in control group

188x180mm (72 x 72 DPI)

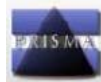

# PRISMA 2009 Checklist

| Section/topic                      | #  | Checklist item                                                                                                                                                                                                                                                                                              | Reported on page #             |
|------------------------------------|----|-------------------------------------------------------------------------------------------------------------------------------------------------------------------------------------------------------------------------------------------------------------------------------------------------------------|--------------------------------|
| <b>TITLE</b>                       |    |                                                                                                                                                                                                                                                                                                             |                                |
| Title                              | 1  | Identify the report as a systematic review, meta-analysis, or both.                                                                                                                                                                                                                                         | 1                              |
| <b>ABSTRACT</b>                    |    |                                                                                                                                                                                                                                                                                                             |                                |
| Structured summary                 | 2  | Provide a structured summary including, as applicable: background; objectives; data sources; study eligibility criteria, participants, and interventions; study appraisal and synthesis methods; results; limitations; conclusions and implications of key findings; systematic review registration number. | 2-3                            |
| <b>INTRODUCTION</b>                |    |                                                                                                                                                                                                                                                                                                             |                                |
| Rationale                          | 3  | Describe the rationale for the review in the context of what is already known.                                                                                                                                                                                                                              | 5-6                            |
| Objectives                         | 4  | Provide an explicit statement of questions being addressed with reference to participants, interventions, comparisons, outcomes, and study design (PICOS).                                                                                                                                                  | 6                              |
| <b>METHODS</b>                     |    |                                                                                                                                                                                                                                                                                                             |                                |
| Protocol and registration          | 5  | Indicate if a review protocol exists, if and where it can be accessed (e.g., Web address), and, if available, provide registration information including registration number.                                                                                                                               | n/a                            |
| Eligibility criteria               | 6  | Specify study characteristics (e.g., PICOS, length of follow-up) and report characteristics (e.g., years considered, language, publication status) used as criteria for eligibility, giving rationale.                                                                                                      | 7-8                            |
| Information sources                | 7  | Describe all information sources (e.g., databases with dates of coverage, contact with study authors to identify additional studies) in the search and date last searched.                                                                                                                                  | 6-7                            |
| Search                             | 8  | Present full electronic search strategy for at least one database, including any limits used, such that it could be repeated.                                                                                                                                                                               | Supplementary file: Appendix A |
| Study selection                    | 9  | State the process for selecting studies (i.e., screening, eligibility, included in systematic review, and, if applicable, included in the meta-analysis).                                                                                                                                                   | 8                              |
| Data collection process            | 10 | Describe method of data extraction from reports (e.g., piloted forms, independently, in duplicate) and any processes for obtaining and confirming data from investigators.                                                                                                                                  | 8                              |
| Data items                         | 11 | List and define all variables for which data were sought (e.g., PICOS, funding sources) and any assumptions and simplifications made.                                                                                                                                                                       | 8                              |
| Risk of bias in individual studies | 12 | Describe methods used for assessing risk of bias of individual studies (including specification of whether this was done at the study or outcome level), and how this information is to be used in any data synthesis.                                                                                      | n/a                            |
| Summary measures                   | 13 | State the principal summary measures (e.g., risk ratio, difference in means).                                                                                                                                                                                                                               | 9                              |
| Synthesis of results               | 14 | Describe the methods of handling data and combining results of studies, if done, including measures of consistency (e.g., $I^2$ ) for each meta-analysis.                                                                                                                                                   | 9-10                           |

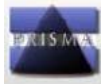

# PRISMA 2009 Checklist

Page 1 of 2

| Section/topic                 | #  | Checklist item                                                                                                                                                                                           | Reported on page # |
|-------------------------------|----|----------------------------------------------------------------------------------------------------------------------------------------------------------------------------------------------------------|--------------------|
| Risk of bias across studies   | 15 | Specify any assessment of risk of bias that may affect the cumulative evidence (e.g., publication bias, selective reporting within studies).                                                             | n/a                |
| Additional analyses           | 16 | Describe methods of additional analyses (e.g., sensitivity or subgroup analyses, meta-regression), if done, indicating which were pre-specified.                                                         | n/a                |
| <b>RESULTS</b>                |    |                                                                                                                                                                                                          |                    |
| Study selection               | 17 | Give numbers of studies screened, assessed for eligibility, and included in the review, with reasons for exclusions at each stage, ideally with a flow diagram.                                          | 10,<br>Figure 1    |
| Study characteristics         | 18 | For each study, present characteristics for which data were extracted (e.g., study size, PICOS, follow-up period) and provide the citations.                                                             | 10                 |
| Risk of bias within studies   | 19 | Present data on risk of bias of each study and, if available, any outcome level assessment (see item 12).                                                                                                | n/a                |
| Results of individual studies | 20 | For all outcomes considered (benefits or harms), present, for each study: (a) simple summary data for each intervention group (b) effect estimates and confidence intervals, ideally with a forest plot. | 12                 |
| Synthesis of results          | 21 | Present results of each meta-analysis done, including confidence intervals and measures of consistency.                                                                                                  | 11-15              |
| Risk of bias across studies   | 22 | Present results of any assessment of risk of bias across studies (see Item 15).                                                                                                                          | n/a                |
| Additional analysis           | 23 | Give results of additional analyses, if done (e.g., sensitivity or subgroup analyses, meta-regression [see Item 16]).                                                                                    | n/a                |
| <b>DISCUSSION</b>             |    |                                                                                                                                                                                                          |                    |
| Summary of evidence           | 24 | Summarize the main findings including the strength of evidence for each main outcome; consider their relevance to key groups (e.g., healthcare providers, users, and policy makers).                     | 15-18              |
| Limitations                   | 25 | Discuss limitations at study and outcome level (e.g., risk of bias), and at review-level (e.g., incomplete retrieval of identified research, reporting bias).                                            | 18-19              |
| Conclusions                   | 26 | Provide a general interpretation of the results in the context of other evidence, and implications for future research.                                                                                  | 19                 |
| <b>FUNDING</b>                |    |                                                                                                                                                                                                          |                    |
| Funding                       | 27 | Describe sources of funding for the systematic review and other support (e.g., supply of data); role of funders for the systematic review.                                                               | n/a                |

From: Moher D, Liberati A, Tetzlaff J, Altman DG, The PRISMA Group (2009). Preferred Reporting Items for Systematic Reviews and Meta-Analyses: The PRISMA Statement. PLoS Med 6(7): e1000097. doi:10.1371/journal.pmed1000097

For more information, visit: [www.prisma-statement.org](http://www.prisma-statement.org)  
For peer review only - <http://bmjopen.bmj.com/site/about/guidelines.xhtml>

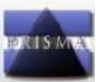

# PRISMA 2009 Checklist

- 1
- 2
- 3
- 4
- 5
- 6
- 7
- 8
- 9
- 10
- 11
- 12
- 13
- 14
- 15
- 16
- 17
- 18
- 19
- 20
- 21
- 22
- 23
- 24
- 25
- 26
- 27
- 28
- 29
- 30
- 31
- 32
- 33
- 34
- 35
- 36
- 37
- 38
- 39
- 40
- 41
- 42
- 43
- 44
- 45
- 46
- 47

For peer review only

# BMJ Open

## Testing for non-inferior mortality: a systematic review of non-inferiority margin sizes and trial characteristics

|                                 |                                                                                                                                                                                                                                                                                                                                                                                                                                                                                                                                                                                                                                                                                                                                                                                                                                                                                                              |
|---------------------------------|--------------------------------------------------------------------------------------------------------------------------------------------------------------------------------------------------------------------------------------------------------------------------------------------------------------------------------------------------------------------------------------------------------------------------------------------------------------------------------------------------------------------------------------------------------------------------------------------------------------------------------------------------------------------------------------------------------------------------------------------------------------------------------------------------------------------------------------------------------------------------------------------------------------|
| Journal:                        | <i>BMJ Open</i>                                                                                                                                                                                                                                                                                                                                                                                                                                                                                                                                                                                                                                                                                                                                                                                                                                                                                              |
| Manuscript ID                   | bmjopen-2020-044480.R2                                                                                                                                                                                                                                                                                                                                                                                                                                                                                                                                                                                                                                                                                                                                                                                                                                                                                       |
| Article Type:                   | Original research                                                                                                                                                                                                                                                                                                                                                                                                                                                                                                                                                                                                                                                                                                                                                                                                                                                                                            |
| Date Submitted by the Author:   | 30-Mar-2021                                                                                                                                                                                                                                                                                                                                                                                                                                                                                                                                                                                                                                                                                                                                                                                                                                                                                                  |
| Complete List of Authors:       | Pong, Sandra; The Hospital for Sick Children, Department of Pharmacy<br>Urner, Martin; University of Toronto, Interdepartmental Division of Critical Care Medicine; University of Toronto, Institute of Health Policy, Management and Evaluation<br>Fowler, Robert; Sunnybrook Health Sciences Centre, Tory Trauma Program; University of Toronto, Interdepartmental Division of Critical Care Medicine<br>Mitsakakis, Nicholas ; University of Toronto, Dalla Lana School of Public Health<br>Seto, Winnie; The Hospital for Sick Children, Department of Pharmacy; University of Toronto, Faculty of Pharmacy<br>Hutchison, Jamie; The Hospital for Sick Children, Department of Critical Care Medicine<br>Science, Michelle; The Hospital for Sick Children, Division of Infectious Diseases<br>Daneman, Nick; Sunnybrook Health Sciences Centre, Division of Infectious Diseases, Department of Medicine |
| <b>Primary Subject Heading</b>: | Research methods                                                                                                                                                                                                                                                                                                                                                                                                                                                                                                                                                                                                                                                                                                                                                                                                                                                                                             |
| Secondary Subject Heading:      | Epidemiology                                                                                                                                                                                                                                                                                                                                                                                                                                                                                                                                                                                                                                                                                                                                                                                                                                                                                                 |
| Keywords:                       | STATISTICS & RESEARCH METHODS, EPIDEMIOLOGY, Clinical trials < THERAPEUTICS                                                                                                                                                                                                                                                                                                                                                                                                                                                                                                                                                                                                                                                                                                                                                                                                                                  |
|                                 |                                                                                                                                                                                                                                                                                                                                                                                                                                                                                                                                                                                                                                                                                                                                                                                                                                                                                                              |

SCHOLARONE™  
Manuscripts



I, the Submitting Author has the right to grant and does grant on behalf of all authors of the Work (as defined in the below author licence), an exclusive licence and/or a non-exclusive licence for contributions from authors who are: i) UK Crown employees; ii) where BMJ has agreed a CC-BY licence shall apply, and/or iii) in accordance with the terms applicable for US Federal Government officers or employees acting as part of their official duties; on a worldwide, perpetual, irrevocable, royalty-free basis to BMJ Publishing Group Ltd ("BMJ") its licensees and where the relevant Journal is co-owned by BMJ to the co-owners of the Journal, to publish the Work in this journal and any other BMJ products and to exploit all rights, as set out in our [licence](#).

The Submitting Author accepts and understands that any supply made under these terms is made by BMJ to the Submitting Author unless you are acting as an employee on behalf of your employer or a postgraduate student of an affiliated institution which is paying any applicable article publishing charge ("APC") for Open Access articles. Where the Submitting Author wishes to make the Work available on an Open Access basis (and intends to pay the relevant APC), the terms of reuse of such Open Access shall be governed by a Creative Commons licence – details of these licences and which [Creative Commons](#) licence will apply to this Work are set out in our licence referred to above.

Other than as permitted in any relevant BMJ Author's Self Archiving Policies, I confirm this Work has not been accepted for publication elsewhere, is not being considered for publication elsewhere and does not duplicate material already published. I confirm all authors consent to publication of this Work and authorise the granting of this licence.



1  
2  
3  
4  
5  
6  
7  
8 **Testing for non-inferior mortality: a systematic review of non-inferiority margin sizes and trial**  
9 **characteristics**  
10  
11  
12  
13  
14  
15  
16  
17

18 Sandra Pong (0000-0003-2963-9601) *clinical pharmacist*<sup>1</sup>, Martin Urner *clinical and research*  
19 *fellow*<sup>2-3</sup>, Robert A Fowler *clinician scientist*<sup>2,4</sup>, Nicholas Mitsakakis *biostatistician*<sup>5</sup>, Winnie Seto  
20 *clinical pharmacist*<sup>1</sup>, James S Hutchison *senior scientist*<sup>6</sup>, Michelle Science *infectious diseases*  
21 *consultant*<sup>7</sup>, Nick Daneman *clinician scientist*<sup>8</sup>  
22  
23  
24  
25  
26  
27  
28

29 <sup>1</sup>Department of Pharmacy, The Hospital for Sick Children, Toronto, Ontario, Canada

30 <sup>2</sup>Interdepartmental Division of Critical Care Medicine, University of Toronto, Toronto, Ontario  
31 Canada

32 <sup>3</sup>Institute of Health Policy, Management and Evaluation, University of Toronto, Toronto,  
33 Ontario, Canada

34 <sup>4</sup>Tory Trauma Program, Sunnybrook Health Sciences Centre, Toronto, Ontario, Canada

35 <sup>5</sup>Dalla Lana School of Public Health, University of Toronto, Toronto, Ontario, Canada

36 <sup>6</sup>Department of Critical Care Medicine, The Hospital for Sick Children, Toronto, Ontario, Canada

37 <sup>7</sup>Division of Infectious Diseases, The Hospital for Sick Children, Toronto, Ontario, Canada

38 <sup>8</sup>Division of Infectious Diseases, Sunnybrook Health Sciences Centre, Toronto, Ontario, Canada  
39  
40  
41  
42  
43  
44  
45  
46

47 **Corresponding author:**

48 Sandra Pong

49 The Hospital for Sick Children

50 555 University Avenue

51 Toronto, Ontario, M5G 1X8

52 Canada

53 sandra.pong@sickkids.ca  
54  
55  
56  
57  
58  
59  
60

**ABSTRACT****OBJECTIVE**

To describe the size and variability of non-inferiority margins used in non-inferiority trials of medications with primary outcomes involving mortality, and to examine the association between trial characteristics and non-inferiority margin size.

**DESIGN**

Systematic review

**DATA SOURCES**

Medline, Medline In Process, Medline Epub Ahead of Print and Embase Classic+Embase databases from January 1989 to December 2019.

**ELIGIBILITY CRITERIA**

Prospective non-inferiority randomized controlled trials comparing pharmacological therapies, with primary analyses for non-inferiority and primary outcomes involving mortality alone or as part of a composite outcome. Trials had to pre-specify non-inferiority margins as absolute risk differences or relative to risks of outcome and provide a baseline risk of primary outcome in the control intervention.

## RESULTS

3992 records were screened, 195 articles were selected for full text review and 111 articles were included for analyses. 82% of trials were conducted in thrombosis, infectious diseases or oncology. Mortality was the sole primary outcome in 23 (21%) trials, and part of a composite primary outcome in 88 (79%) trials. The overall median non-inferiority margin was an absolute risk difference of 9% (IQR 4.2-10%). When non-inferiority margins were expressed relative to the baseline risk of primary outcome in control groups, the median relative non-inferiority margin was 1.5 (IQR 1.3-1.7). In multivariable regression analyses examining the association between trial characteristics (medical specialty, inclusion of pediatric patients, mortality as a sole or part of a composite primary outcome, presence of industry funding) and non-inferiority margin size, only medical specialty was significantly associated with non-inferiority margin size.

## CONCLUSION

Absolute and relative non-inferiority margins used in published trials comparing medications are large, allowing conclusions of non-inferiority in the context of large differences in mortality. Accepting the potential for large increases in outcomes involving mortality while declaring non-inferiority is a challenging methodological issue in the conduct of non-inferiority trials.

### STRENGTHS AND LIMITATIONS OF THIS STUDY

- There have been no previous reviews or studies that describe the size and variability of non-inferiority margins used in trials with high-stake outcomes such as mortality.
- Our comprehensive and sensitive search for non-inferiority trials spanned a 30-year period to ensure that virtually all non-inferiority trials with primary outcome involving mortality would be captured.
- We were reliant on authors to provide the values of non-inferiority margins and estimated risks of outcomes in their sample size calculations.

**WORD COUNT:** 3110 words

## INTRODUCTION

The premise of non-inferiority trials is to demonstrate that a new treatment is no worse than a standard intervention by a pre-specified non-inferiority margin chosen by researchers.<sup>1</sup> Yet proving that drugs, devices and other medical treatments are no worse than a comparison is challenging.<sup>2-3</sup> The acceptable width of the margin of non-inferiority is a controversial aspect in the design of these studies. It is a determinant of the required sample size of a trial and has a large influence on the interpretation of “not unacceptably worse.” Wide margins allow smaller sample sizes to conclude non-inferiority, but if a margin is too wide, a conclusion of non-inferiority could be clinically irrelevant or ethically inappropriate. This would be especially disturbing if the implications of accepting a truly inadequate treatment as non-inferior involves death as an outcome.<sup>2</sup>

Design and analytical challenges, and the deficits in adherence to reporting standards of non-inferiority trials have been described in multiple studies and reviews.<sup>4-12</sup> Much attention has been focused on how non-inferiority margins are selected, whether they are justified<sup>10,13</sup> and how they affect the validity of trial results and conclusions.<sup>11-12</sup> The size of non-inferiority margins could also be influenced by the effectiveness of the standard treatment. A highly effective standard treatment could allow researchers to tolerate higher thresholds for decreased effectiveness with a new treatment.<sup>14</sup> However, prior research has not described the size and variability of non-inferiority margins used in trials with high-stake outcomes such as mortality, nor examined whether certain trial characteristics such as the type of patients, medical conditions studied, choice of outcomes and baseline risks of outcomes are associated

1  
2  
3 with the selection of smaller or larger non-inferiority margins. There is a need to establish  
4  
5 standards for the design and analyses of non-inferiority trials to promote consistent quality of  
6  
7 these trials. An important step, therefore, is to identify the range of non-inferiority margins  
8  
9 used in non-inferiority trials and determine whether trial characteristics influence the selection  
10  
11 of margin sizes.  
12  
13  
14  
15

16  
17  
18 In this systematic review, our primary objective was to describe the size and variability of non-  
19  
20 inferiority margins used in non-inferiority trials of medications with primary outcomes involving  
21  
22 mortality. Our secondary objective was to assess whether selected trial characteristics were  
23  
24 associated with non-inferiority margin size. We hypothesized that non-inferiority margins in  
25  
26 these trials will be large and variable; and the size of non-inferiority margins will be related to  
27  
28 the type of patients and medical conditions studied, as well as availability of industry funding  
29  
30 and how mortality has been included in the outcome.  
31  
32  
33  
34  
35  
36

## 37 **METHODS**

38  
39 We followed the Preferred Reporting Items for Systematic Reviews and Meta-Analysis (PRISMA)  
40  
41 statement to report this systematic review.<sup>15</sup>  
42  
43  
44  
45

### 46 **Search strategy**

47  
48 We searched Medline, Medline In Process, Medline Epub Ahead of Print and Embase  
49  
50 Classic+Embase databases (OvidSP) (search performed February 8, 2019, updated December  
51  
52 12, 2019) to identify randomized controlled non-inferiority trials published between 1989 and  
53  
54  
55  
56  
57  
58  
59  
60

1  
2  
3 2019. Our decision to start our search from 1989 was informed by a review that described the  
4  
5 changes in publication rate of non-inferiority trials between 1989 and 2009, and found 583  
6  
7 published non-inferiority trials but only one that was published prior to 1998.<sup>3</sup>  
8  
9

10  
11  
12  
13 Subject heading and text-word terms for “equivalence trials or non-inferiority or inferiority  
14  
15 studies” and mortality were used with the Cochrane sensitive trials filter. Of note, “non-  
16  
17 inferiority trial” and “inferiority trial” terms are indexed together with “equivalence trial” in  
18  
19 Ovid and the term “equivalence trial” was only introduced as a Medical Subject Heading  
20  
21 (MeSH) in 2018. Results were restricted to the English language and trials performed in  
22  
23 humans. The complete electronic database search strategies are presented in Appendix A. To  
24  
25 ensure that all relevant trials were captured, the electronic database search was supplemented  
26  
27 with a manual search by scanning the reference lists of included trials and relevant reviews, in  
28  
29 addition to a search of the reviewers’ personal files.  
30  
31  
32  
33  
34  
35  
36  
37

### 38 **Eligibility criteria**

39  
40 We included all prospective non-inferiority randomized controlled trials involving human  
41  
42 subjects that compared pharmacological therapies, where the primary analysis was for non-  
43  
44 inferiority and the primary outcome included mortality, either alone or as part of a composite  
45  
46 outcome. All trials had to pre-specify a non-inferiority margin (as an absolute risk difference or  
47  
48 relative to the risk of outcome) and provide a baseline estimate of the risk of primary outcome  
49  
50 in the control intervention in a sample size calculation. In cases where these variables changed  
51  
52  
53  
54  
55  
56  
57  
58  
59  
60

1  
2  
3 during the course of the trial, the initial values used in the original trial design were used for  
4  
5 analyses. No distinction between pediatric or adult populations was made.  
6  
7  
8  
9

10 We excluded trials that did not provide a sample size calculation based on a pre-specified non-  
11  
12 inferiority margin and estimated baseline risk of outcome. To enable comparisons of non-  
13  
14 inferiority margins across different trials, we also excluded trials that used non-inferiority  
15  
16 margins expressed as incidence rate ratios, odds ratios or hazard ratios because incidence and  
17  
18 hazard ratios are relative to an outcome event rate that changes with time and with odds  
19  
20 ratios, the baseline risk of outcome in the control group cannot be determined to convert the  
21  
22 ratio to a relative non-inferiority margin unless it was explicitly stated by the authors. We also  
23  
24 excluded articles that described sub-studies, post-hoc analyses or follow-up studies of  
25  
26 randomized trials.  
27  
28  
29  
30  
31  
32  
33  
34

### 35 **Selection of trials**

36  
37 One review author (SP) screened titles and abstracts of all retrieved records for obvious  
38  
39 exclusions. Two review authors (SP and MU) independently assessed potentially eligible trials  
40  
41 based on full text review. Disagreements were resolved by arbitration by a third review author  
42  
43 (ND).  
44  
45  
46  
47  
48  
49

### 50 **Data collection**

51  
52 One review author (SP) extracted data from the included trials using a standardized form to  
53  
54 collect information on: year of publication, medical specialty area, inclusion of pediatric  
55  
56  
57  
58  
59  
60



1  
2  
3 patients (age less than 18 years), mortality as a single or part of a composite primary outcome,  
4  
5 estimated risk of primary outcome in the control group, non-inferiority margin, industry  
6  
7 funding (disclosures in the publication about funding or sponsorship by a pharmaceutical  
8  
9 company) and conclusion about non-inferiority.  
10  
11  
12  
13  
14

### 15 **Statistical analyses**

16  
17  
18 Trial characteristics were summarized using counts and proportions. To enable comparisons of  
19  
20 non-inferiority margins across different trials as either absolute or relative margins, we  
21  
22 converted non-inferiority margins expressed as absolute risk differences in percentages into  
23  
24 relative non-inferiority margins relative to the estimated risk of outcome for each trial's control  
25  
26 group. The reverse was also done to convert relative non-inferiority margins into equivalent  
27  
28 margins in terms of absolute differences. Graphical plots were used to explore an association  
29  
30 between absolute non-inferiority margins and the estimated risks of outcome in control groups,  
31  
32 and to describe the distribution of absolute and relative non-inferiority margins used in the  
33  
34 trials.  
35  
36  
37  
38  
39  
40  
41

42 For the primary objective, descriptive statistics (median, interquartile range (IQR), range) of  
43  
44 absolute and relative non-inferiority margins were summarized for the overall cohort of trials  
45  
46 included in the review. We also stratified these by trial characteristics: medical specialty,  
47  
48 inclusion of pediatric patients, mortality as a single or composite outcome, industry funding and  
49  
50 publication date pre- or post-2010 release of the first FDA draft guidance statement about non-  
51  
52 inferiority trials. To investigate whether there was a difference in non-inferiority margins  
53  
54  
55  
56  
57  
58  
59

1  
2  
3 (absolute and relative) according to trial characteristics, we compared non-inferiority margins  
4  
5 using Wilcoxon rank sum test (for 2 groups) and Kruskal-Wallis rank sum test (for >2 groups).  
6  
7  
8  
9

10 For the secondary objective, we used multivariable linear regression to examine the association  
11  
12 between pre-specified trial characteristics (medical specialty, inclusion of pediatric patients,  
13  
14 mortality as single or composite outcome and industry funding) as independent variables and  
15  
16 non-inferiority margin size as the outcome variable. Due to the skewed distribution of the  
17  
18 absolute and relative non-inferiority margins, we applied a log-transformation to the outcome  
19  
20 variable to improve the performance and diagnostics of the regression models. All comparisons  
21  
22 were two-sided and  $p < 0.05$  was considered statistically significant. Statistical analyses were  
23  
24 conducted using R version 4.0.2.  
25  
26  
27  
28  
29  
30  
31

## 32 **RESULTS**

33  
34 We screened 3992 records for relevance using titles and abstracts and selected 195 articles for  
35  
36 full text review. After independent assessment of the full text articles and discussion among  
37  
38 reviewers, a total of 111 articles met eligibility criteria to be included for analyses (Figure 1).  
39  
40  
41

42 The agreement between reviewers was excellent (kappa statistic = 0.86).  
43  
44  
45  
46

47 <<Figure 1: PRISMA flow diagram<sup>15</sup>>>  
48  
49  
50  
51  
52  
53  
54  
55  
56  
57  
58  
59  
60

### Trial characteristics

Among the 111 trials included, 91 (82%) were trials conducted in thrombosis, infectious diseases or oncology. Mortality was the sole primary outcome in 23 (21%) trials, and part of a composite primary outcome in 88 (79%) trials. Over half of the trials disclosed receiving some form of industry funding. Of the included trials, 82 (74%) concluded non-inferiority, 21 (19%) did not conclude non-inferiority and the remaining 8 (7%) were either inconclusive, stopped early or unclear about their conclusions. The non-inferiority margin was expressed as an absolute risk difference in 109 (98%) trials. A summary of the included trials is provided in Appendix B.

### Association between absolute non-inferiority margins and estimated baseline risks of outcome (involving mortality) in control groups

Figure 2 is a scatterplot between absolute non-inferiority margins and estimated baseline risks of outcome (i.e. mortality alone or a composite outcome that included mortality) in the control group for the trials included in this review. A Spearman's correlation shows a moderate, positive monotonic correlation ( $r_s = 0.6$ ,  $p < 0.001$ ) between the two. Variability in the absolute non-inferiority margins can be seen at both high and low estimates of baseline risks of outcome. There was also a strong correlation between the observed outcomes reported in the trials and the initial estimated risks of outcome in the control groups ( $r_s = 0.81$ ,  $p < 0.001$ , Appendix C).

<<Figure 2: Association between absolute non-inferiority margins and estimated risks of outcome in control group>>

1  
2  
3  
4  
5  
6 <<Appendix C: Relationship between observed outcomes and estimated risks of outcome in  
7 control group>>  
8  
9

10 **Distribution of non-inferiority margins for outcomes involving mortality**  
11

12 The distribution of absolute non-inferiority margins subdivided by medical specialty is shown in  
13 Figure 3A. There was a wide range of non-inferiority margins for trial outcomes that involve  
14 mortality (0.4 to 30%), with a skewed distribution and distinct peaks observed at 5, 9 and 15%.  
15  
16 Thrombosis trials used smaller non-inferiority margins more commonly than did other trials.  
17  
18  
19  
20  
21  
22  
23  
24

25 Figure 3B illustrates a similarly skewed distribution of relative non-inferiority margins  
26 subdivided by medical specialty. The most common relative non-inferiority margin observed  
27 was in the range of 1.26 to 1.5. Most relative non-inferiority margins clustered in the range of  
28 1.3 to 1.7, however there were also many relative non-inferiority margins that were greater  
29 than 2.  
30  
31  
32  
33  
34  
35  
36  
37  
38  
39

40 <<Figure 3: Distribution of absolute and relative non-inferiority margins for primary outcomes  
41 involving mortality>>  
42  
43  
44

45 **Characteristics of non-inferiority margins**  
46

47 The characteristics of the non-inferiority margins in the trials included in this review are  
48 summarized in Table 1. The median absolute non-inferiority margin was 9% (IQR 4.2-10%) and  
49 the median relative non-inferiority margin was 1.5 (IQR 1.3-1.7).  
50  
51  
52  
53  
54  
55  
56  
57  
58  
59  
60

**Table 1: Summary of characteristics of non-inferiority trials included**

|                                                                   | n (%)     | Absolute non-inferiority margin (%) for outcomes involving mortality |         |         | Relative non-inferiority margin for outcomes involving mortality |           |         |
|-------------------------------------------------------------------|-----------|----------------------------------------------------------------------|---------|---------|------------------------------------------------------------------|-----------|---------|
|                                                                   |           | Median (IQR <sup>a</sup> )                                           | Range   | p-value | Median (IQR <sup>a</sup> )                                       | Range     | p-value |
| <b>Overall</b>                                                    | 111       | 9 (4.2-10)                                                           | 0.4-30  | --      | 1.5 (1.3-1.7)                                                    | 1.1-4.5   | --      |
| <b>Medical specialty</b>                                          |           |                                                                      |         |         |                                                                  |           |         |
| <b>Thrombosis</b>                                                 | 37 (33.3) | 3.6 (2-5)                                                            | 0.4-30  | <0.001  | 1.4 (1.3-1.7)                                                    | 1.1-3.9   | 0.02    |
| <b>Infectious diseases</b>                                        | 31 (27.9) | 10 (5.5-10)                                                          | 3-20    |         | 1.5 (1.5-1.7)                                                    | 1.2-4.5   |         |
| <b>Oncology</b>                                                   | 23 (20.7) | 10 (7.5-13.8)                                                        | 4-17.5  |         | 1.5 (1.3-1.9)                                                    | 1.1-3     |         |
| <b>Transplant</b>                                                 | 11 (9.9)  | 10 (10-13.5)                                                         | 9-20    |         | 1.7 (1.5-2.5)                                                    | 1.4-4.3   |         |
| <b>Cardiology</b>                                                 | 4 (3.6)   | 7.5 (5-10.5)                                                         | 5-12    |         | 1.3 (1.2-1.3)                                                    | 1.1-1.4   |         |
| <b>Gastroenterology</b>                                           | 2 (1.8)   | 12.5 (11.3-13.8)                                                     | 10-15   |         | 1.9 (1.6-2.2)                                                    | 1.3-2.5   |         |
| <b>Respirology</b>                                                | 2 (1.8)   | 12.3 (11.1-13.4)                                                     | 10-14.5 |         | 1.3 (1.27-1.3)                                                   | 1.25-1.32 |         |
| <b>Anesthesia</b>                                                 | 1 (0.9)   | 10 (10-10)                                                           | 10-10   |         | 1.4 (1.4-1.4)                                                    | 1.4-1.4   |         |
| <b>Pediatric patients included</b>                                |           |                                                                      |         |         |                                                                  |           |         |
| <b>Yes</b>                                                        | 21 (18.9) | 10 (5-10)                                                            | 3.5-15  | 0.11    | 1.7 (1.5-2)                                                      | 1.2-4.5   | 0.10    |
| <b>No</b>                                                         | 85 (76.6) | 8 (4-10)                                                             | 0.7-30  |         | 1.5 (1.3-1.7)                                                    | 1.1-4.3   |         |
| <b>Unclear/not explicitly stated</b>                              | 5 (4.5)   | 5.5 (2.2-5.6)                                                        | 0.4-10  |         | 1.4 (1.1-1.5)                                                    | 1.1-3.2   |         |
| <b>Mortality outcome</b>                                          |           |                                                                      |         |         |                                                                  |           |         |
| <b>Single</b>                                                     | 23 (20.7) | 10 (5-12.8)                                                          | 0.4-15  | 0.24    | 1.3 (1.2-1.6)                                                    | 1.1-2.5   | 0.03    |
| <b>Composite</b>                                                  | 88 (79.3) | 7.8 (4-10)                                                           | 0.8-30  |         | 1.5 (1.4-1.7)                                                    | 1.1-4.5   |         |
| <b>Industry funding</b>                                           |           |                                                                      |         |         |                                                                  |           |         |
| <b>Yes</b>                                                        | 61 (55)   | 5.6 (3.5-10)                                                         | 0.4-30  | 0.01    | 1.5 (1.3-1.7)                                                    | 1.1-4.5   | 0.41    |
| <b>No</b>                                                         | 42 (37.8) | 10 (5-10)                                                            | 0.8-15  |         | 1.5 (1.4-1.8)                                                    | 1.1-4     |         |
| <b>Unclear/not explicitly stated</b>                              | 8 (7.2)   | 10 (10-13.4)                                                         | 5.5-15  |         | 1.4 (1.3-2.7)                                                    | 1.3-4.3   |         |
| <b>Pre- and post-2010 release of draft FDA guidance statement</b> |           |                                                                      |         |         |                                                                  |           |         |
| <b>Pre-2010</b>                                                   | 35 (31.5) | 7.9 (3.8-10)                                                         | 0.4-15  | 0.24    | 1.4 (1.2-1.7)                                                    | 1.1-4     | 0.02    |
| <b>Post-2010</b>                                                  | 76 (68.5) | 9.5 (4.5-10)                                                         | 0.8-30  |         | 1.5 (1.4-1.7)                                                    | 1.2-4.5   |         |

<sup>a</sup>Interquartile range

The differences in both absolute and relative non-inferiority margins used among medical specialties were significant. Thrombosis trials had the lowest median absolute non-inferiority margin of 3.6%. Although there was a wide range of absolute and relative non-inferiority margins used across trials, the absolute non-inferiority margins of at least one trial in every specialty was 10% or greater.

Trials with mortality as part of a composite primary outcome had significantly higher relative non-inferiority margins compared to those with mortality as a single primary outcome. In

1  
2  
3 contrast, when the non-inferiority margin was expressed as an absolute risk difference, there  
4  
5 was no significant difference in the margins between type of mortality outcome. Industry-  
6  
7 funded trials had a significantly lower median absolute non-inferiority margin compared to  
8  
9 those without industry funding.  
10  
11  
12  
13  
14

15 In this review, 35 (32%) trials were published before 2010 when the first draft FDA guidance  
16  
17 statement about non-inferiority trials was published. The relative non-inferiority margin sizes  
18  
19 were significantly larger in trials that were published after 2010. A similar trend was seen with  
20  
21 the absolute non-inferiority margin sizes, but the difference was not statistically significant.  
22  
23  
24  
25  
26  
27

### 28 **Association between trial characteristics and non-inferiority margin size**

29  
30 In our regression analyses of the association between trial characteristics and non-inferiority  
31  
32 margin sizes, log-transformation of the non-inferiority margin (outcome variable) resulted in  
33  
34 slight improvements to the performance of the regression models. The diagnostic plots of the  
35  
36 regression models before and after log-transformation of the absolute and relative non-  
37  
38 inferiority margins are provided in Appendix D. Table 2 shows the  $\beta$  coefficients with 95%  
39  
40 confidence intervals (CI) from our regression analysis of the association between trial  
41  
42 characteristics and the log-transformed absolute non-inferiority margin (adjusted R-squared =  
43  
44 0.44). Thrombosis trials had significantly smaller log-absolute non-inferiority margins  
45  
46 compared to trials in infectious diseases (reference group) when adjusted for pediatric patients,  
47  
48 single or composite mortality outcome and industry funding. When we analyzed the same for  
49  
50 log-transformed relative non-inferiority margins (Table 3), trials related to transplant had  
51  
52  
53  
54  
55  
56  
57  
58  
59  
60

significantly larger log-relative non-inferiority margins compared to infectious diseases

(adjusted R-squared = 0.1).

**Table 2: Absolute non-inferiority margin regression analyses**

| Predictor                | Adjusted $\beta$ coefficient* | 95% CI        | p-value |
|--------------------------|-------------------------------|---------------|---------|
| <b>Specialty</b>         |                               |               |         |
| Oncology                 | 0.12                          | -0.19 to 0.43 | 0.45    |
| Cardiovascular           | -0.23                         | -0.84 to 0.39 | 0.46    |
| Thrombosis               | -1.14                         | -1.48 to -0.8 | <0.001  |
| Transplant               | 0.15                          | -0.3 to 0.6   | 0.5     |
| Other <sup>#</sup>       | 0.42                          | -0.13 to 0.98 | 0.14    |
| Infectious diseases      | 1 (reference)                 | --            | --      |
| <b>Pediatrics</b>        |                               |               |         |
| Yes                      | -0.22                         | -0.54 to 0.11 | 0.19    |
| No                       | 1 (reference)                 | --            | --      |
| <b>Mortality outcome</b> |                               |               |         |
| Single                   | -0.27                         | -0.56 to 0.02 | 0.07    |
| Composite                | 1 (reference)                 | --            | --      |
| <b>Industry funding</b>  |                               |               |         |
| Yes                      | 0.08                          | -0.19 to 0.36 | 0.55    |
| No                       | 1 (reference)                 | --            | --      |

\*Omnibus F-test: 11.93 (8, 102),  $p < 0.05$ , adjusted R-squared = 0.44

<sup>#</sup>Due to low number of trials, "Other" category combines trials in anesthesia, gastroenterology and respirology

**Table 3: Relative non-inferiority margin regression analyses**

| Predictor                | Adjusted $\beta$ coefficient* | 95% CI        | p-value |
|--------------------------|-------------------------------|---------------|---------|
| <b>Specialty</b>         |                               |               |         |
| Oncology                 | -0.08                         | -0.24 to 0.07 | 0.3     |
| Cardiovascular           | -0.23                         | -0.54 to 0.07 | 0.13    |
| Thrombosis               | 0.01                          | -0.16 to 0.18 | 0.9     |
| Transplant               | 0.24                          | 0.01 to 0.46  | 0.04    |
| Other <sup>#</sup>       | -0.13                         | -0.41 to 0.15 | 0.35    |
| Infectious diseases      | 1 (reference)                 | --            | --      |
| <b>Pediatrics</b>        |                               |               |         |
| Yes                      | 0.1                           | -0.06 to 0.26 | 0.23    |
| No                       | 1 (reference)                 | --            | --      |
| <b>Mortality outcome</b> |                               |               |         |
| Single                   | -0.11                         | -0.25 to 0.03 | 0.13    |
| Composite                | 1 (reference)                 | --            | --      |
| <b>Industry funding</b>  |                               |               |         |
| Yes                      | -0.13                         | -0.27 to 0.01 | 0.06    |
| No                       | 1 (reference)                 | --            | --      |

\*Omnibus F-test: 2.56 (8, 102),  $p < 0.05$ , adjusted R-squared = 0.1

<sup>#</sup>Due to low number of trials, "Other" category combines trials in anesthesia, gastroenterology and respirology

## DISCUSSION

We conducted a systematic review of 111 non-inferiority trials that compared pharmacological therapies where mortality was included in the primary outcome. We found that the majority of non-inferiority trials focused on thrombosis, infectious diseases and oncology. There was a wide range of non-inferiority margins used in these trials, irrespective of whether they were expressed as a measure of absolute effect or when converted to a relative effect. Our results showed that in the design of at least half of the non-inferiority trials included in this review, all of which included mortality as part of their primary outcome, a "new" drug therapy could have an absolute increase of 9% or relative increase of 50% in mortality outcomes compared to controls and still be accepted as non-inferior. Accepting the potential for this increase in



1  
2  
3 mortality while declaring non-inferiority is a challenging methodological issue in the conduct of  
4  
5 non-inferiority trials.  
6  
7  
8  
9

10 In our review, we also found that non-inferiority margins were more commonly expressed in  
11  
12 terms of absolute risk differences than in relative terms. Whether to present absolute or  
13  
14 relative non-inferiority margins is a source of debate in the design of non-inferiority trials.<sup>16</sup>  
15  
16

17 There is no clear consensus on the selection of the most appropriate effect measure but it has  
18  
19 been demonstrated that different ways of expressing effect measures could result in different  
20  
21 conclusions within the same non-inferiority trial.<sup>14,16-17</sup> Since a relative non-inferiority margin  
22  
23 accounts for the estimated baseline risk of outcome, it would be a more conservative choice  
24  
25 over an absolute margin to conclude non-inferiority should the event rate in the control group  
26  
27 be lower than expected.  
28  
29  
30  
31  
32  
33  
34

35 We detected significant variations in absolute and relative non-inferiority margin size according  
36  
37 to medical specialty which could be partially explained by differences in acuity of diseases,  
38  
39 patient age and life expectancy.<sup>18</sup> We also found that industry-funded trials had significantly  
40  
41 lower median absolute non-inferiority margins compared to those without industry funding,  
42  
43 presumably related to greater financial resources and higher capacity to support larger trials  
44  
45 that are necessary when smaller non-inferiority margins are used. However, the difference was  
46  
47 not significant when relative non-inferiority margins were compared between trials with and  
48  
49 without industry funding.  
50  
51  
52  
53  
54  
55  
56  
57  
58  
59  
60

1  
2  
3 When we compared non-inferiority margin size between trials published before and after the  
4  
5 release of the 2010 draft FDA guidance document on non-inferiority studies, we found that the  
6  
7 median non-inferiority margin in trials published after 2010 was increased rather than  
8  
9 decreased. This was significant only for relative non-inferiority margins, but not for absolute  
10  
11 non-inferiority margins. Perhaps future guidelines could generate reductions in non-inferiority  
12  
13 margins used for randomized controlled trials involving mortality, if they recommend margins  
14  
15 lower, rather than higher than the current median (<9% absolute mortality, <1.5 times relative  
16  
17 mortality).

18  
19  
20  
21  
22  
23  
24  
25 There is currently limited research in the pre-defined determinants of the size of non-inferiority  
26  
27 margins used in non-inferiority trials. Gayet-Ageron et al. conducted a survey among trialists to  
28  
29 assess the association of pre-defined trial factors and non-inferiority margins. They found that  
30  
31 lower non-inferiority margins were associated with mortality as a primary outcome, low  
32  
33 baseline risk and lower costs of new treatments. In contrast, population age group and  
34  
35 difficulties with patient recruitment did not appear to affect the choice of margin.<sup>19</sup> Because of  
36  
37 the nature of a survey study, these results were based on self-report by respondents and were  
38  
39 not necessarily reflective of actual practice when non-inferiority trials are designed and  
40  
41 conducted.

42  
43  
44  
45  
46  
47  
48  
49 In our review of published non-inferiority trials of drug therapies that included mortality as part  
50  
51 of their primary outcome, we examined for an association between non-inferiority margin size  
52  
53 and medical specialty, inclusion of pediatric patients, mortality as a single or composite  
54  
55  
56  
57  
58  
59  
60

1  
2  
3 outcome and presence of industry funding. Medical specialty was the only trial characteristic  
4 found to be significantly associated with the size of non-inferiority margins--specifically,  
5  
6 thrombosis trials were associated with smaller absolute non-inferiority margins, while  
7  
8 transplant trials were associated with larger relative non-inferiority margins.  
9  
10  
11

12  
13  
14  
15 Similar to Gayet-Ageron et al.'s<sup>19</sup> results, we found a significant correlation between the size  
16  
17 of absolute non-inferiority margins and estimated baseline risks of outcomes in the control  
18  
19 group. While this association was moderate ( $r_s = 0.6$ ), it suggests that larger absolute non-  
20  
21 inferiority margins are used when estimated risks of outcome occurring in control groups are  
22  
23 higher. As can be seen in Figure 2, this relationship appears most evident for baseline outcome  
24  
25 risks up to approximately 20%, beyond which larger absolute non-inferiority margins are no  
26  
27 longer associated with higher baseline risk of outcome.  
28  
29  
30  
31  
32  
33  
34

35 A strength of our review is the comprehensive and sensitive search for non-inferiority trials  
36  
37 which spanned a 30-year period to ensure that virtually all non-inferiority trials with a primary  
38  
39 outcome involving mortality would be captured. There were no limits placed on the type of  
40  
41 medical specialty or patient population as long as a trial compared mortality between  
42  
43 pharmacological therapies. However, we relied on authors to provide the values of non-  
44  
45 inferiority margins and estimated risks of outcome in their sample size calculations within the  
46  
47 publication or in their supplementary materials. The accuracy of reporting these variables was  
48  
49 taken at face value. To enable standardized comparisons of absolute and relative non-  
50  
51 inferiority margins to be made consistently across all trials included in the review, we omitted  
52  
53  
54  
55  
56  
57  
58  
59  
60

1  
2  
3 non-inferiority trials that used hazard ratios, odds ratios and event rate measures that either  
4  
5 changed with time or would not allow us to determine the estimated risk of outcome in the  
6  
7 control group required for analyses. Although there was a large amount of variability in the  
8  
9 regression models with low adjusted R-squared values, the direction and significance of the  
10  
11 independent variables adjusted for in the models indicated that there was an important effect  
12  
13 of medical specialty on non-inferiority margin size.  
14  
15  
16  
17  
18  
19

20 The absolute and relative non-inferiority margins used in published trials comparing  
21  
22 medications are large, allowing conclusions of non-inferiority in the context of large differences  
23  
24 in mortality, and highly variable. Most trials utilize non-inferiority margins based on an  
25  
26 absolute risk difference, which has only a moderate association with baseline estimates of risk  
27  
28 for outcomes. With increasing popularity of non-inferiority trials, clinicians and other users of  
29  
30 the medical literature should pay close attention to the size of non-inferiority margins used in  
31  
32 these trials and consider the influence of study design parameters and inherent trial  
33  
34 characteristics when interpreting the results. A collaborative effort to develop standards for  
35  
36 the design and analyses of future non-inferiority trials would be beneficial to the scientific  
37  
38 community.  
39  
40  
41  
42  
43  
44  
45  
46  
47  
48  
49  
50  
51  
52  
53  
54  
55  
56  
57  
58  
59  
60

**REFERENCES**

- 1 Piaggio G, Elbourne DR, Altman DG, Pocock SJ, Evans SJ; CONSORT Group. Reporting of noninferiority and equivalence randomized trials: an extension of the CONSORT statement. *JAMA* 2006;295:1152-60.
- 2 Mauri L, D'Agostino RB. Challenges in the design and interpretation of noninferiority trials. *N Engl J Med* 2017;377:1357-67.
- 3 Suda KJ, Hurley AM, McKibbin T, Motl Moroney SE. Publication of noninferiority clinical trials: changes over a 20-year interval. *Pharmacotherapy* 2011;31:833-9.
- 4 Wangge G, Klungel OH, Roes KC, de Boer A, Hoes AW, Knol MJ. Room for improvement in conducting and reporting non-inferiority randomized controlled trials on drugs: a systematic review. *PLoS ONE* 2010;5:e13550. doi:10.1371/journal.pone.0013550
- 5 Schiller P, Burchardi N, Niestroj M, Kieser M. Quality of reporting of clinical non-inferiority and equivalence randomised trials—update and extension. *Trials* 2012;13:214. <https://doi.org/10.1186/1745-6215-13-214>
- 6 Lange S, Freitag G. Choice of delta: requirements and reality—results of a systematic review. *Biom J* 2005;47:12-27.
- 7 Althunian TA, de Boer A, Klungel OH, Insani WN, Groenwold RH. Methods of defining the non-inferiority margin in randomized, double-blind controlled trials: a systematic review. *Trials* 2017;18:107. <https://doi.org/10.1186/s13063-017-1859-x>

- 1  
2  
3 8 Rehal S, Morris TP, Fielding K, Carpenter JR, Phillips PP. Non-inferiority trials: are they  
4 inferior? A systematic review of reporting in major medical journals. *BMJ Open*  
5  
6 2016;6:e012594. doi: 10.1136/bmjopen-2016-012594  
7  
8  
9  
10 9 Schumi J, Wittes JT. Through the looking glass: understanding non-inferiority. *Trials*  
11  
12 2011;12:106. <https://doi.org/10.1186/1745-6215-12-106>  
13  
14  
15 10 D'Agostino RB, Massaro JM, Sullivan LM. Non-inferiority trials: design concepts and issues—  
16 the encounters of academic consultants in statistics. *Statist Med* 2003;22:169-86.  
17  
18  
19 11 Aberegg SK, Hersh AM, Samore MH. Empirical consequences of current recommendations  
20 for the design and interpretation of noninferiority trials. *J Gen Intern Med* 2018;33:88-96.  
21  
22  
23 12 Hersh AM, Walter RJ, Abberegg SK. Use of mortality as an endpoint in noninferiority trials  
24 may lead to ethically problematic conclusions. *J Gen Intern Med* 2019;34:618-23.  
25  
26  
27 13 Center for Drug Evaluation and Research, Center for Biologics Evaluation and Research.  
28 Non-inferiority clinical trials to establish effectiveness—guidance for industry. Silver Spring,  
29 MD: Food and Drug Administration, November 2016. Available at:  
30  
31 [https://www.fda.gov/regulatory-information/search-fda-guidance-documents/non-](https://www.fda.gov/regulatory-information/search-fda-guidance-documents/non-inferiority-clinical-trials)  
32 inferiority-clinical-trials  
33  
34  
35  
36  
37  
38  
39  
40  
41  
42 14 Head SJ, Kaul S, Bogers AJ, Kappetein AP. Non-inferiority study design: lessons to be learned  
43 from cardiovascular trials. *Eur Heart J* 2012;33:1318-24.  
44  
45  
46  
47 15 Moher D, Liberati A, Tetzlaff J, Altman DG; PRISMA Group. Preferred reporting items for  
48 systematic reviews and meta-analyses: the PRISMA statement. *BMJ* 2009;339:b2535.  
49  
50  
51  
52  
53  
54  
55  
56  
57  
58  
59  
60

- 1  
2  
3 16 Abulizi X, Flandre P. Choice of treatment-effect measures when noninferiority margins  
4 originally defined in absolute difference translated into relative difference influenced the  
5 results of clinical trials. *J Clin Epidemiol* 2018;96:63-72.  
6  
7  
8  
9  
10 17 Althunian TA, de Boer A, Groenwold RHH, Klungel OH. Defining the noninferiority margin  
11 and analysing noninferiority: an overview. *Br J Clin Pharmacol* 2017;83:1636-42.  
12  
13 18 Gladstone BP, Vach W. Choice of non-inferiority (NI) margins does not protect against  
14 degradation of treatment effects on an average—an observational study of registered and  
15 published NI trials. *PLoS ONE* 2014;9:e103616. doi:10.1371/journal.pone.0103616  
16  
17  
18  
19  
20 19 Gayet-Ageron A, Agoritsas T, Rudaz S, Courvoisier D, Perneger T. The choice of the  
21 noninferiority margin in clinical trials was driven by baseline risk, type of primary outcome,  
22 and benefits of new treatment. *J Clin Epidemiol* 2015;68:1144-51.  
23  
24  
25  
26  
27  
28  
29  
30  
31  
32  
33  
34  
35  
36  
37  
38  
39  
40  
41  
42  
43  
44  
45  
46  
47  
48  
49  
50  
51  
52  
53  
54  
55  
56  
57  
58  
59  
60

## STATEMENTS

### Author contributions

SP, ND and RF drafted the study protocol. SP designed the data collection form, screened titles and abstracts, performed statistical analyses and drafted the study manuscript. SP and MU reviewed full-text articles and performed data collection. ND, MU, RF, NM, WS, JH and MS critically reviewed the final manuscript.

### Licence statement

The Submitting Author has the right to grant and does grant on behalf of all authors of the Work (as defined in the below author licence), an exclusive licence and/or a non-exclusive licence for contributions from authors who are: i) UK Crown employees; ii) where BMJ has agreed a CC-BY licence shall apply, and/or iii) in accordance with the terms applicable for US Federal Government officers or employees acting as part of their official duties; on a worldwide, perpetual, irrevocable, royalty-free basis to BMJ Publishing Group Ltd ("BMJ") its licensees and where the relevant Journal is co-owned by BMJ to the co-owners of the Journal, to publish the Work in BMJ Open and any other BMJ products and to exploit all rights, as set out in our licence.

The Submitting Author accepts and understands that any supply made under these terms is made by BMJ to the Submitting Author unless you are acting as an employee on behalf of your employer or a postgraduate student of an affiliated institution which is paying any applicable article publishing charge ("APC") for Open Access articles. Where the Submitting Author wishes to make the Work available on an Open Access basis (and intends to pay the relevant APC), the terms of reuse of such Open Access shall be governed by a Creative Commons licence – details of these licences and which Creative Commons licence will apply to this Work are set out in our licence referred to above.

### Competing interests declaration

All authors have completed the ICMJE uniform disclosure form and declare: no support from any organisation for the submitted work; no financial relationships with any organisations that might have an interest in the submitted work in the previous three years, no other relationships or activities that could appear to have influenced the submitted work.

### Ethics approval

Not required

### Funding statement

This research received no specific grant from any funding agency in the public, commercial or not-for-profit sectors. SP is supported by a SickKids Clinician-Scientist Training Program Scholarship from The Hospital for Sick Children. MU is supported by a Vanier Canada Graduate Scholarship from the Canadian Institutes of Health Research.



1  
2  
3 **Patient and public involvement statement**

4 It was not appropriate or possible to involve patients or the public in the design, or conduct, or  
5 reporting, or dissemination plans of our research.  
6  
7

8 **Data sharing statement**

9 Data and statistical code are available on request to the corresponding author.  
10  
11  
12  
13  
14  
15  
16  
17  
18  
19  
20  
21  
22  
23  
24  
25  
26  
27  
28  
29  
30  
31  
32  
33  
34  
35  
36  
37  
38  
39  
40  
41  
42  
43  
44  
45  
46  
47  
48  
49  
50  
51  
52  
53  
54  
55  
56  
57  
58  
59  
60

For peer review only

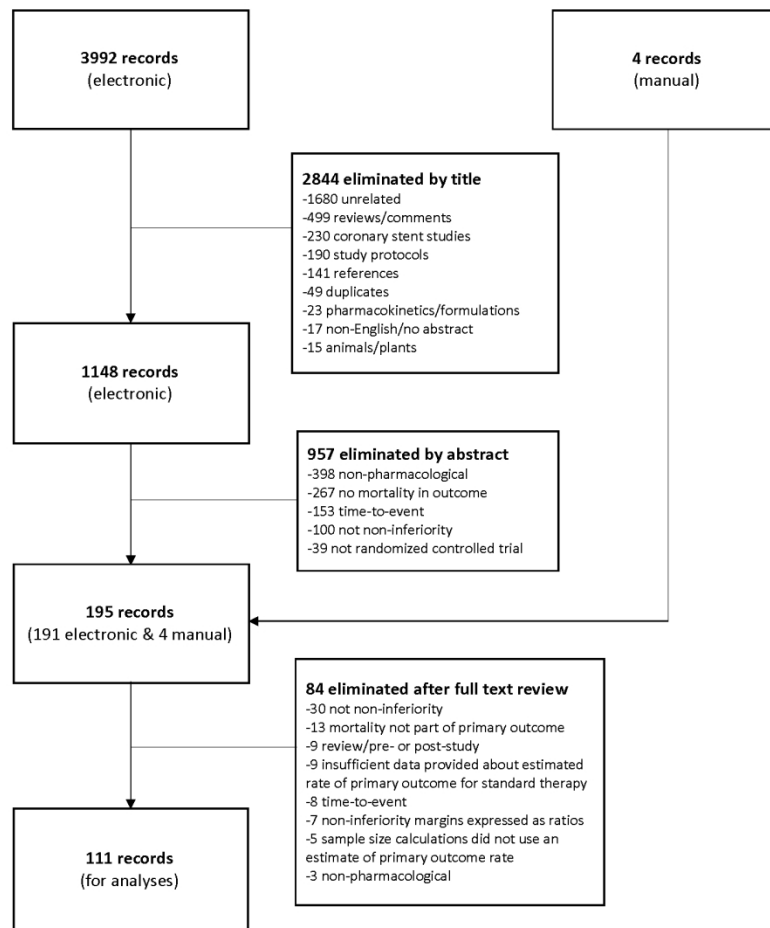Figure 1: PRISMA flow diagram<sup>14</sup>

Figure 1: PRISMA flow diagram

215x279mm (200 x 200 DPI)



Figure 2: Association between absolute non-inferiority margins and estimated risks of outcome in control group

1  
2  
3  
4  
5  
6  
7  
8  
9  
10  
11  
12  
13  
14  
15  
16  
17  
18  
19  
20  
21  
22  
23  
24  
25  
26  
27  
28  
29  
30  
31  
32  
33  
34  
35  
36  
37  
38  
39  
40  
41  
42  
43  
44  
45  
46  
47  
48  
49  
50  
51  
52  
53  
54  
55  
56  
57  
58  
59  
60

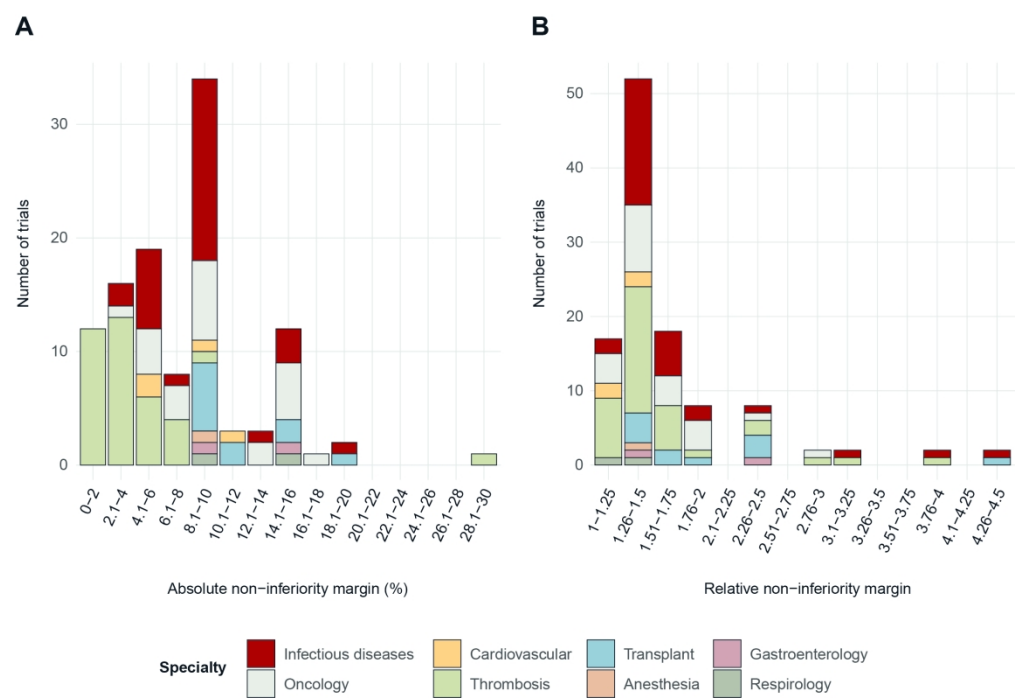

Figure 3: Distribution of absolute and relative non-inferiority margins for primary outcomes involving mortality

## Appendix A: Search strategy

### MEDLINE

|    | Searches                                                                                                                                                                                       | Results | Annotations |
|----|------------------------------------------------------------------------------------------------------------------------------------------------------------------------------------------------|---------|-------------|
| 1  | equivalence trial/                                                                                                                                                                             | 503     |             |
| 2  | equivalence trials as topic/                                                                                                                                                                   | 282     |             |
| 3  | (noninferiority or non-inferiority or equivalence or equivilency or<br>equivilencies or inferiority or "NI margin*" or "delta margin*" or<br>(prespecified adj2 margin*) or margins).ti,ab,kf. | 70165   |             |
| 4  | or/1-3                                                                                                                                                                                         | 70414   |             |
| 5  | mo.fs.                                                                                                                                                                                         | 561893  |             |
| 6  | (mortality or mortalities or death or deaths or dying or fatal*).ti,ab,kf.                                                                                                                     | 1493002 |             |
| 7  | mortality/ or cause of death/ or fatal outcome/ or hospital mortality/ or<br>infant mortality/ or maternal mortality/                                                                          | 213608  |             |
| 8  | or/5-7 [****mortality terms****]                                                                                                                                                               | 1834719 |             |
| 9  | 4 and 8 [****base clinical set****]                                                                                                                                                            | 9115    |             |
| 10 | randomized controlled trial.pt.                                                                                                                                                                | 500401  |             |
| 11 | controlled clinical trial.pt.                                                                                                                                                                  | 93574   |             |
| 12 | randomized.ab.                                                                                                                                                                                 | 469732  |             |
| 13 | placebo.ab.                                                                                                                                                                                    | 205181  |             |
| 14 | drug therapy.fs.                                                                                                                                                                               | 2180485 |             |
| 15 | randomly.ab.                                                                                                                                                                                   | 327066  |             |
| 16 | trial.ab.                                                                                                                                                                                      | 494306  |             |
| 17 | groups.ab.                                                                                                                                                                                     | 2008069 |             |
| 18 | or/10-17                                                                                                                                                                                       | 4632786 |             |

|    |                                                                                                                                   |         |
|----|-----------------------------------------------------------------------------------------------------------------------------------|---------|
| 19 | exp animals/ not humans.sh.                                                                                                       | 4672546 |
| 20 | 18 not 19 [****Cochrane Handbook Highly Sensitive Search Strategy for identifying randomized trials (Box 6.4.c 2008 version)****] | 4014138 |
| 21 | 9 and 20 [****Final results****]                                                                                                  | 3721    |
| 22 | limit 21 to (english language and humans and yr="1989 -Current")                                                                  | 3212    |

## Medline-in-Process

|    | Searches                                                                                                                                                                                 | Results | Annotations |
|----|------------------------------------------------------------------------------------------------------------------------------------------------------------------------------------------|---------|-------------|
| 1  | equivalenc*adj3 trial*.ti,ab,kf.                                                                                                                                                         | 0       |             |
| 2  | (noninferiority or non-inferiority or equivalence or equivilency or equivilencies or inferiority or "NI margin*" or "delta margin*" or (prespecified adj2 margin*) or margins).ti,ab,kf. | 70227   |             |
| 3  | or/1-2                                                                                                                                                                                   | 70227   |             |
| 4  | (mortality or mortalities or death or deaths or dying or fatal*).ti,ab,kf.                                                                                                               | 1493992 |             |
| 5  | 3 and 4 [****Base clinical set****]                                                                                                                                                      | 5800    |             |
| 6  | ((randomized or randomised or controlled) adj3 trial*).ti,ab,kf.                                                                                                                         | 401027  |             |
| 7  | placebo.ab.                                                                                                                                                                              | 205277  |             |
| 8  | randomly.ab.                                                                                                                                                                             | 327266  |             |
| 9  | trial.ab.                                                                                                                                                                                | 494765  |             |
| 10 | groups.ab.                                                                                                                                                                               | 2009271 |             |
| 11 | or/6-10 [****Trial terms****]                                                                                                                                                            | 2722197 |             |
| 12 | 5 and 11 [****Final results****]                                                                                                                                                         | 2313    |             |

## Medline Epubs Ahead of Print

|    | Searches                                                                   | Results | Annotations |
|----|----------------------------------------------------------------------------|---------|-------------|
| 1  | equivalenc*adj3 trial*.ti,ab,kf.                                           | 0       |             |
| 2  | (noninferiority or non-inferiority or equivalence or equivilency or        | 70227   |             |
| 3  | equivilencies or inferiority or "NI margin*" or "delta margin*" or         |         |             |
| 4  | (prespecified adj2 margin*) or margins).ti,ab,kf.                          |         |             |
| 5  | or/1-2                                                                     | 70227   |             |
| 6  | (mortality or mortalities or death or deaths or dying or fatal*).ti,ab,kf. | 1493992 |             |
| 7  | 3 and 4 [****Base clinical set****]                                        | 5800    |             |
| 8  | ((randomized or randomised or controlled) adj3 trial*).ti,ab,kf.           | 401027  |             |
| 9  | placebo.ab.                                                                | 205277  |             |
| 10 | randomly.ab.                                                               | 327266  |             |
| 11 | trial.ab.                                                                  | 494765  |             |
| 12 | groups.ab.                                                                 | 2009271 |             |
| 13 | or/6-10 [****Trial terms****]                                              | 2722197 |             |
| 14 | 5 and 11 [****Final results****]                                           | 2313    |             |
| 15 | equivalenc*adj3 trial*.ti,ab,kf.                                           | 0       |             |
| 16 | (noninferiority or non-inferiority or equivalence or equivilency or        | 70227   |             |
| 17 | equivilencies or inferiority or "NI margin*" or "delta margin*" or         |         |             |
| 18 | (prespecified adj2 margin*) or margins).ti,ab,kf.                          |         |             |
| 19 | or/13-14                                                                   | 70227   |             |
| 20 | (mortality or mortalities or death or deaths or dying or fatal*).ti,ab,kf. | 1493992 |             |
| 21 | 15 and 16 [****Base clinical set****]                                      | 5800    |             |
| 22 | ((randomized or randomised or controlled) adj3 trial*).ti,ab,kf.           | 401027  |             |
| 23 | placebo.ab.                                                                | 205277  |             |

|    |                                   |         |
|----|-----------------------------------|---------|
| 20 | randomly.ab.                      | 327266  |
| 21 | trial.ab.                         | 494765  |
| 22 | groups.ab.                        | 2009271 |
| 23 | or/18-22 [***Trial terms***]      | 2722197 |
| 24 | 17 and 23 [****Final results****] | 2313    |

### Embase Classic+Embase databases (OvidSP)

|    | Searches                                                                                                                                                                                       | Results | Annotations |
|----|------------------------------------------------------------------------------------------------------------------------------------------------------------------------------------------------|---------|-------------|
| 1  | equivalenc*adj3 trial*.ti,ab,kf.                                                                                                                                                               | 0       |             |
| 2  | (noninferiority or non-inferiority or equivalence or equivalency or<br>equivilencies or inferiority or "NI margin*" or "delta margin*" or<br>(prespecified adj2 margin*) or margins).ti,ab,kf. | 70227   |             |
| 3  | or/1-2                                                                                                                                                                                         | 70227   |             |
| 4  | (mortality or mortalities or death or deaths or dying or fatal*).ti,ab,kf.                                                                                                                     | 1493992 |             |
| 5  | 3 and 4 [****Base clinical set****]                                                                                                                                                            | 5800    |             |
| 6  | ((randomized or randomised or controlled) adj3 trial*).ti,ab,kf.                                                                                                                               | 401027  |             |
| 7  | placebo.ab.                                                                                                                                                                                    | 205277  |             |
| 8  | randomly.ab.                                                                                                                                                                                   | 327266  |             |
| 9  | trial.ab.                                                                                                                                                                                      | 494765  |             |
| 10 | groups.ab.                                                                                                                                                                                     | 2009271 |             |
| 11 | or/6-10 [***Trial terms***]                                                                                                                                                                    | 2722197 |             |
| 12 | 5 and 11 [****Final results****]                                                                                                                                                               | 2313    |             |
| 13 | equivalenc*adj3 trial*.ti,ab,kf.                                                                                                                                                               | 0       |             |



|    |    |                                                                            |
|----|----|----------------------------------------------------------------------------|
| 1  |    |                                                                            |
| 2  |    |                                                                            |
| 3  |    |                                                                            |
| 4  | 14 | (noninferiority or non-inferiority or equivalence or equivilency or        |
| 5  |    | equivilencies or inferiority or "NI margin*" or "delta margin*" or         |
| 6  |    | (prespecified adj2 margin*) or margins).ti,ab,kf.                          |
| 7  |    |                                                                            |
| 8  |    |                                                                            |
| 9  | 15 | or/13-14                                                                   |
| 10 |    |                                                                            |
| 11 | 16 | (mortality or mortalities or death or deaths or dying or fatal*).ti,ab,kf. |
| 12 |    |                                                                            |
| 13 | 17 | 15 and 16 [****Base clinical set****]                                      |
| 14 |    |                                                                            |
| 15 |    |                                                                            |
| 16 | 18 | ((randomized or randomised or controlled) adj3 trial*).ti,ab,kf.           |
| 17 |    |                                                                            |
| 18 | 19 | placebo.ab.                                                                |
| 19 |    |                                                                            |
| 20 | 20 | randomly.ab.                                                               |
| 21 |    |                                                                            |
| 22 |    |                                                                            |
| 23 | 21 | trial.ab.                                                                  |
| 24 |    |                                                                            |
| 25 | 22 | groups.ab.                                                                 |
| 26 |    |                                                                            |
| 27 |    |                                                                            |
| 28 | 23 | or/18-22 [***Trial terms***]                                               |
| 29 |    |                                                                            |
| 30 | 24 | 17 and 23 [****Final results****]                                          |
| 31 |    |                                                                            |
| 32 | 25 | (equivalen* adj2 trial*).ti,ab.                                            |
| 33 |    |                                                                            |
| 34 |    |                                                                            |
| 35 | 26 | (noninferiority or non-inferiority or equivalence or equivilency or        |
| 36 |    | equivilencies or inferiority or "NI margin*" or "delta margin*" or         |
| 37 |    | (prespecified adj2 margin*) or margins).ti,ab.                             |
| 38 |    |                                                                            |
| 39 |    |                                                                            |
| 40 | 27 | or/25-26 [***equivalency or non-inferiority terms****]                     |
| 41 |    |                                                                            |
| 42 | 28 | (mortality or mortalities or death or deaths or dying or fatal*).ti,ab.    |
| 43 |    |                                                                            |
| 44 | 29 | mortality/ or cancer mortality/ or childhood mortality/ or embryo          |
| 45 |    | mortality/ or fetus mortality/ or infant mortality/ or maternal mortality/ |
| 46 |    | or prenatal mortality/ or surgical mortality/ or perinatal mortality/ or   |
| 47 |    | newborn mortality/                                                         |
| 48 |    |                                                                            |
| 49 |    |                                                                            |
| 50 |    |                                                                            |
| 51 | 30 | death/ or "cause of death"/ or dying/ or heart death/ or sudden death/     |
| 52 |    | or child death/ or newborn death/                                          |
| 53 |    |                                                                            |
| 54 | 31 | or/28-30 [****mortality terms****]                                         |
| 55 |    |                                                                            |
| 56 |    |                                                                            |
| 57 |    |                                                                            |
| 58 |    |                                                                            |
| 59 |    |                                                                            |
| 60 |    |                                                                            |

1  
2  
3  
4  
5  
6  
7  
8  
9  
10  
11  
12  
13  
14  
15  
16  
17  
18  
19  
20  
21  
22  
23  
24  
25  
26  
27  
28  
29  
30  
31  
32  
33  
34  
35  
36  
37  
38  
39  
40  
41  
42  
43  
44  
45  
46  
47  
48  
49  
50  
51  
52  
53  
54  
55  
56  
57  
58  
59  
60

|    |                                                                                                         |         |
|----|---------------------------------------------------------------------------------------------------------|---------|
| 32 | 27 and 31 [****Base clinical set****]                                                                   | 5823    |
| 33 | randomized controlled trial/                                                                            | 500622  |
| 34 | double-blind procedure/                                                                                 | 0       |
| 35 | single-blind procedure/                                                                                 | 0       |
| 36 | crossover-procedure/                                                                                    | 0       |
| 37 | random*.ti,ab,kw.                                                                                       | 1109854 |
| 38 | factorial*.ti,ab,kw.                                                                                    | 29313   |
| 39 | crossover*.ti,ab,kw.                                                                                    | 62938   |
| 40 | "cross over".ti,ab,kw.                                                                                  | 22789   |
| 41 | "cross-over*".ti,ab,kw.                                                                                 | 23015   |
| 42 | placebo*.ti,ab,kw.                                                                                      | 212808  |
| 43 | (doubl* adj5 blind*).ti,ab,kw.                                                                          | 149043  |
| 44 | (singl* adj5 blind*).ti,ab,kw.                                                                          | 22640   |
| 45 | assign*.ti,ab,kw.                                                                                       | 308920  |
| 46 | allocat*.ti,ab,kw.                                                                                      | 115873  |
| 47 | volunteer*.ti,ab,kw.                                                                                    | 189496  |
| 48 | or/33-47 [****Cochrane Box 6.3.2.2 EMBASE sensitive<br>TherapyTreatment Effectiveness Filter terms****] | 1731635 |
| 49 | 32 and 48 [***Cochrane trial filter****]                                                                | 1802    |
| 50 | ct.fs.                                                                                                  | 0       |
| 51 | 32 and 50 [***clinical trial subheading****]                                                            | 0       |
| 52 | limit 32 to (randomized controlled trial or controlled clinical trial or<br>multicenter study)          | 1230    |

|    |    |                                                                               |
|----|----|-------------------------------------------------------------------------------|
| 1  |    |                                                                               |
| 2  |    |                                                                               |
| 3  |    |                                                                               |
| 4  | 53 | or/49,51-52 [****Final results****] 1974                                      |
| 5  |    |                                                                               |
| 6  | 54 | limit 53 to conference abstract [Limit not valid in Ovid MEDLINE(R),Ovid 1974 |
| 7  |    | MEDLINE(R) Daily Update,Ovid MEDLINE(R) In-Process,Ovid MEDLINE(R)            |
| 8  |    | Publisher; records were retained]                                             |
| 9  |    |                                                                               |
| 10 |    |                                                                               |
| 11 | 55 | 53 not 54 [***Conference abstracts removed****] 0                             |
| 12 |    |                                                                               |
| 13 | 56 | limit 55 to (human and english language and yr="1989 -Current") 0             |
| 14 |    |                                                                               |
| 15 |    |                                                                               |
| 16 |    |                                                                               |
| 17 |    |                                                                               |
| 18 |    |                                                                               |
| 19 |    |                                                                               |
| 20 |    |                                                                               |
| 21 |    |                                                                               |
| 22 |    |                                                                               |
| 23 |    |                                                                               |
| 24 |    |                                                                               |
| 25 |    |                                                                               |
| 26 |    |                                                                               |
| 27 |    |                                                                               |
| 28 |    |                                                                               |
| 29 |    |                                                                               |
| 30 |    |                                                                               |
| 31 |    |                                                                               |
| 32 |    |                                                                               |
| 33 |    |                                                                               |
| 34 |    |                                                                               |
| 35 |    |                                                                               |
| 36 |    |                                                                               |
| 37 |    |                                                                               |
| 38 |    |                                                                               |
| 39 |    |                                                                               |
| 40 |    |                                                                               |
| 41 |    |                                                                               |
| 42 |    |                                                                               |
| 43 |    |                                                                               |
| 44 |    |                                                                               |
| 45 |    |                                                                               |
| 46 |    |                                                                               |
| 47 |    |                                                                               |
| 48 |    |                                                                               |
| 49 |    |                                                                               |
| 50 |    |                                                                               |
| 51 |    |                                                                               |
| 52 |    |                                                                               |
| 53 |    |                                                                               |
| 54 |    |                                                                               |
| 55 |    |                                                                               |
| 56 |    |                                                                               |
| 57 |    |                                                                               |
| 58 |    |                                                                               |
| 59 |    |                                                                               |
| 60 |    |                                                                               |

## Appendix B: Non-inferiority trials

| Author                                         | Year | Country       | Specialty           | Pediatric patients included | Mortality as single or composite outcome | Industry funding     | Conclusion       | Estimated risk of event in control (%) | Observed event in control (%) | Absolute non-inferiority margin (% difference) | Relative non-inferiority margin |
|------------------------------------------------|------|---------------|---------------------|-----------------------------|------------------------------------------|----------------------|------------------|----------------------------------------|-------------------------------|------------------------------------------------|---------------------------------|
| African Neonatal Sepsis Trial (AFRINEST) group | 2015 | international | infectious diseases | yes                         | composite                                | no                   | non-inferior     | 10                                     | 8                             | 5                                              | 1.5                             |
| Ahn et al.                                     | 2013 | Korea         | oncology            | no                          | single                                   | not explicit/unclear | non-inferior     | 41.2                                   | 23                            | 13                                             | 1.32                            |
| Aliberti et al.                                | 2017 | Italy         | infectious diseases | no                          | composite                                | no                   | stopped early    | 10                                     | 7.4                           | 5                                              | 1.5                             |
| Baqui et al.                                   | 2015 | Bangladesh    | infectious diseases | yes                         | composite                                | no                   | non-inferior     | 10                                     | 10                            | 5                                              | 1.5                             |
| Bertrand et al.                                | 2006 | Canada        | thrombosis          | no                          | composite                                | yes                  | non-inferior     | 23                                     | 18.2                          | 8                                              | 1.35                            |
| Beyer-Westendorf et al.                        | 2017 | Germany       | thrombosis          | no                          | composite                                | yes                  | non-inferior     | 3                                      | 1.7                           | 4.5                                            | 2.5                             |
| Borchmann et al.                               | 2017 | international | oncology            | no                          | composite                                | yes                  | non-inferior     | 12                                     | 8.8                           | 6                                              | 1.5                             |
| Brack et al.                                   | 2012 | international | infectious diseases | yes                         | composite                                | yes                  | not non-inferior | 1                                      | 2.9                           | 3.5                                            | 4.5                             |
| Budde et al.                                   | 2014 | international | transplant          | no                          | composite                                | yes                  | non-inferior     | 15                                     | 19.6                          | 10                                             | 1.67                            |
| The Matisse Investigators                      | 2003 | international | thrombosis          | no                          | composite                                | yes                  | non-inferior     | 5                                      | 5                             | 3.5                                            | 1.7                             |
| Bunnapradist et al.                            | 2013 | international | transplant          | no                          | composite                                | yes                  | non-inferior     | 6                                      | 2.5                           | 9                                              | 2.5                             |
| Cai et al.                                     | 2014 | China         | transplant          | no                          | composite                                | yes                  | non-inferior     | 20                                     | 16.7                          | 20                                             | 2                               |
| Chastre et al.                                 | 2003 | France        | infectious diseases | no                          | single                                   | no                   | non-inferior     | 40                                     | 17.2                          | 10                                             | 1.25                            |
| Cordonnier et al.                              | 2009 | France        | infectious diseases | no                          | single                                   | no                   | non-inferior     | 9.2                                    | 2.7                           | 8                                              | 1.87                            |
| de Kraker et al.                               | 2004 | international | oncology            | yes                         | composite                                | no                   | non-inferior     | 15                                     | 8.6                           | 10                                             | 1.67                            |
| De Simone et al.                               | 2012 | international | transplant          | no                          | composite                                | yes                  | non-inferior     | 24                                     | 9.5                           | 12                                             | 1.5                             |
| Diener et al.                                  | 2006 | international | thrombosis          | no                          | composite                                | yes                  | non-inferior     | 9.3                                    | 8.8                           | 5                                              | 1.54                            |
| Eckardt et al.                                 | 2006 | international | oncology            | no                          | single                                   | yes                  | non-inferior     | 62                                     | 69                            | 10                                             | 1.16                            |
| Eriksson et al.                                | 2011 | international | thrombosis          | no                          | composite                                | yes                  | non-inferior     | 20                                     | 8.8                           | 7.7                                            | 1.39                            |
| Eriksson et al.                                | 2007 | international | thrombosis          | no                          | composite                                | yes                  | non-inferior     | 48                                     | 37.7                          | 9.2                                            | 1.19                            |

|                    |      |               |                     |              |           |                      |                  |      |      |      |      |
|--------------------|------|---------------|---------------------|--------------|-----------|----------------------|------------------|------|------|------|------|
| Eriksson et al.    | 2007 | international | thrombosis          | no           | composite | yes                  | non-inferior     | 20   | 6.7  | 7.7  | 1.39 |
| Feres et al.       | 2013 | Brazil        | thrombosis          | no           | composite | yes                  | non-inferior     | 9    | 5.8  | 2.7  | 1.3  |
| Ferre et al.       | 2017 | international | oncology            | yes          | composite | no                   | non-inferior     | 10   | 10.1 | 10   | 2    |
| Gaston et al.      | 2009 | US            | transplant          | yes          | composite | yes                  | non-inferior     | 20   | 27.9 | 10   | 1.5  |
| Giamarellou et al. | 2000 | Greece        | infectious diseases | no           | composite | not explicit/unclear | non-inferior     | 25   | 49.2 | 10   | 1.4  |
| Gilard et al.      | 2015 | international | thrombosis          | no           | composite | yes                  | non-inferior     | 3    | 1.5  | 2    | 1.67 |
| Gulizia et al.     | 2008 | Italy         | cardiology          | no           | composite | not explicit/unclear | non-inferior     | 38   | 40   | 10   | 1.26 |
| Gwon et al.        | 2012 | Korea         | thrombosis          | no           | composite | yes                  | non-inferior     | 10   | 4.3  | 4    | 1.4  |
| Sibbing et al.     | 2017 | international | thrombosis          | no           | composite | yes                  | non-inferior     | 10.5 | 9    | 30   | 3.86 |
| Han et al.         | 2016 | China         | thrombosis          | no           | composite | yes                  | non-inferior     | 8.3  | 5.9  | 3.7  | 1.45 |
| Harris et al.      | 2018 | international | infectious diseases | no           | single    | no                   | not non-inferior | 14   | 3.7  | 5    | 1.36 |
| Hofheinz et al.    | 2012 | Germany       | oncology            | no           | single    | yes                  | non-inferior     | 42.5 | 33   | 12.5 | 1.29 |
| Huh et al.         | 2017 | Korea         | transplant          | no           | composite | yes                  | non-inferior     | 10   | 13.3 | 15   | 2.5  |
| Iversen et al.     | 2019 | Denmark       | infectious diseases | no           | composite | no                   | non-inferior     | 10   | 12.1 | 10   | 2    |
| Jeng et al.        | 2018 | international | transplant          | no           | composite | yes                  | non-inferior     | 20   | 5.8  | 12   | 1.6  |
| Johnson et al.     | 2016 | international | oncology            | no           | composite | no                   | not non-inferior | 5    | 14.3 | 5    | 2    |
| Jones et al.       | 2016 | Canada        | anesthesia          | no           | composite | no                   | non-inferior     | 25   | 30   | 10   | 1.4  |
| Kim et al.         | 2012 | Korea         | thrombosis          | no           | composite | yes                  | non-inferior     | 11   | 4.7  | 4    | 1.36 |
| Park et al.        | 2013 | Korea         | thrombosis          | no           | composite | no                   | non-inferior     | 3    | 1.4  | 0.75 | 1.25 |
| Hahn et al.        | 2018 | Korea         | thrombosis          | no           | composite | yes                  | non-inferior     | 4.5  | 4.2  | 2    | 1.44 |
| Kirchhof et al.    | 2012 | Germany       | cardiology          | no           | composite | yes                  | not non-inferior | 29.8 | na   | 12   | 1.4  |
| Kirchhof et al.    | 2018 | international | thrombosis          | no           | composite | no                   | non-inferior     | 17   | 7.3  | 7.5  | 1.44 |
| Kutner et al.      | 2015 | US            | cardiology          | no           | single    | no                   | not non-inferior | 21   | 20.3 | 5    | 1.24 |
| Le et al.          | 2017 | Vietnam       | infectious diseases | no           | single    | no                   | non-inferior     | 15   | 6.5  | 10   | 1.67 |
| Lee et al.         | 2018 | Korea         | thrombosis          | no           | composite | yes                  | non-inferior     | 7    | 0.6  | 4    | 1.57 |
| Lee et al.         | 2009 | UK            | oncology            | not explicit | single    | no                   | non-inferior     | 80   | 69   | 10   | 1.13 |

1  
2  
3  
4  
5  
6  
7  
8  
9  
10  
11  
12  
13  
14  
15  
16  
17  
18  
19  
20  
21  
22  
23  
24  
25  
26  
27  
28  
29  
30  
31  
32  
33  
34  
35  
36  
37  
38  
39  
40  
41  
42  
43  
44  
45  
46  
47

|                         |      |               |                     |     |           |                      |                  |     |       |      |      |
|-------------------------|------|---------------|---------------------|-----|-----------|----------------------|------------------|-----|-------|------|------|
| Liu et al.              | 2013 | China         | oncology            | yes | single    | no                   | stopped early    | 15  | na    | 15   | 2    |
| Maertens et al.         | 2016 | international | infectious diseases | no  | single    | yes                  | non-inferior     | 20  | 20    | 10   | 1.5  |
| Mai et al.              | 2016 | international | oncology            | no  | composite | yes                  | non-inferior     | 50  | na    | 15   | 1.3  |
| Matsumura-Nakano et al. | 2019 | Japan         | thrombosis          | no  | composite | yes                  | not non-inferior | 8   | 13.6  | 4    | 1.5  |
| Mavroudis et al.        | 2016 | Greece        | oncology            | no  | composite | no                   | not non-inferior | 15  | 10.5  | 7    | 1.47 |
| Mavroudis et al.        | 2015 | Greece        | oncology            | no  | composite | no                   | not non-inferior | 15  | 4.3   | 8    | 1.53 |
| Merle et al.            | 2014 | international | infectious diseases | no  | composite | no                   | not non-inferior | 20  | 17.2  | 6    | 1.3  |
| Mesu et al.             | 2018 | international | infectious diseases | yes | composite | no                   | non-inferior     | 6   | 2.4   | 13   | 3.17 |
| Meynard et al.          | 2018 | France        | infectious diseases | no  | composite | yes                  | not non-inferior | 15  | 29    | 10   | 1.67 |
| Mir et al.              | 2017 | Pakistan      | infectious diseases | yes | composite | no                   | non-inferior     | 10  | 11.8  | 5    | 1.5  |
| Molloy et al.           | 2018 | international | infectious diseases | no  | single    | no                   | non-inferior     | 15  | 21.4  | 10   | 1.67 |
| Nakamura et al.         | 2017 | Japan         | thrombosis          | no  | composite | no                   | non-inferior     | 4.5 | 1.5   | 2    | 1.44 |
| Nathan et al.           | 2005 | Niger         | infectious diseases | yes | composite | no                   | non-inferior     | 15  | 9     | 10   | 1.67 |
| Park et al.             | 2014 | Korea         | gastroenterology    | no  | single    | no                   | not non-inferior | 10  | na    | 15   | 2.5  |
| Paul et al.             | 2015 | Israel        | infectious diseases | no  | composite | no                   | not non-inferior | 30  | 27    | 15   | 1.5  |
| Ponticelli et al.       | 2014 | Italy         | transplant          | no  | composite | not explicit/unclear | inconclusive     | 3   | 2.8   | 10   | 4.33 |
| Postma et al.           | 2015 | Netherlands   | infectious diseases | no  | single    | no                   | non-inferior     | 5   | na    | 3    | 1.6  |
| Pritchard-Jones et al.  | 2015 | international | oncology            | yes | composite | no                   | non-inferior     | 14  | 7.4   | 10   | 1.71 |
| Pujade-Lauraine et al.  | 2010 | international | oncology            | no  | composite | yes                  | non-inferior     | 77  | 80    | 7.9  | 1.1  |
| Qazi et al.             | 2017 | international | transplant          | no  | composite | yes                  | not non-inferior | 25  | 20.4  | 10   | 1.4  |
| Reynolds et al.         | 2010 | Uganda        | infectious diseases | no  | composite | no                   | non-inferior     | 5   | 29.8  | 15   | 4    |
| Riess et al.            | 2010 | Germany       | thrombosis          | no  | composite | yes                  | non-inferior     | 4.7 | 4.52  | 3.45 | 1.73 |
| Russ et al.             | 2013 | international | transplant          | no  | composite | yes                  | unclear          | 10  | 14    | 15   | 2.5  |
| Schrappe et al.         | 2018 | international | oncology            | yes | composite | no                   | not non-inferior | 4   | 4.4   | 4    | 2    |
| Schroder et al.         | 2004 | international | oncology            | no  | single    | no                   | inconclusive     | 50  | 24.04 | 15   | 1.3  |

|                           |      |               |                     |              |           |                      |                  |     |       |       |      |
|---------------------------|------|---------------|---------------------|--------------|-----------|----------------------|------------------|-----|-------|-------|------|
| Schulz-Schupke et al.     | 2015 | international | thrombosis          | no           | composite | yes                  | stopped early    | 10  | 1.6   | 2     | 1.2  |
| Tedesco Silva et al.      | 2010 | international | transplant          | no           | composite | yes                  | non-inferior     | 20  | 24.2  | 10    | 1.5  |
| Sinha et al.              | 2005 | international | respirology         | yes          | single    | yes                  | non-inferior     | 45  | na    | 14.5  | 1.32 |
| Stabile et al.            | 2008 | Italy         | thrombosis          | not explicit | composite | not explicit/unclear | non-inferior     | 2.5 | 3.7   | 5.5   | 3.2  |
| Stellbrink et al.         | 2004 | Germany       | thrombosis          | no           | composite | yes                  | non-inferior     | 4   | 4.8   | 2     | 1.5  |
| Stets et al.              | 2019 | international | infectious diseases | no           | composite | yes                  | non-inferior     | 21  | 17.3  | 10    | 1.48 |
| Stone et al.              | 2007 | international | thrombosis          | no           | composite | yes                  | not non-inferior | 5.9 | 7.1   | 1.48  | 1.25 |
| Swaminathan et al.        | 2011 | India         | infectious diseases | no           | composite | no                   | not non-inferior | 10  | 15    | 15    | 2.5  |
| The GUSTO V Investigators | 2001 | international | thrombosis          | no           | single    | yes                  | non-inferior     | 7.4 | 5.9   | 0.74  | 1.1  |
| Turpie et al.             | 2009 | international | thrombosis          | no           | composite | yes                  | non-inferior     | 27  | 10.1  | 4     | 1.15 |
| Walsh et al.              | 2004 | international | infectious diseases | yes          | composite | yes                  | non-inferior     | 50  | 66.3  | 10    | 1.2  |
| Willenheimer et al.       | 2005 | international | cardiology          | no           | composite | yes                  | not non-inferior | 40  | 36.8  | 5     | 1.13 |
| Yahav et al.              | 2019 | international | infectious diseases | no           | composite | not explicit/unclear | non-inferior     | 35  | 48.3  | 10    | 1.29 |
| Yakoub-Agha et al.        | 2012 | international | oncology            | no           | single    | not explicit/unclear | inconclusive     | 50  | 27.2  | 14.64 | 1.29 |
| Yang et al.               | 2018 | China         | oncology            | yes          | composite | no                   | non-inferior     | 5   | na    | 10    | 3    |
| Daniels et al.            | 2019 | South Africa  | infectious diseases | yes          | composite | no                   | non-inferior     | 7   | 11.4  | 5     | 1.71 |
| Cisneros et al.           | 2019 | international | infectious diseases | no           | single    | no                   | not non-inferior | 20  | 25.3  | 10    | 1.5  |
| Hahn et al.               | 2019 | Korea         | thrombosis          | no           | composite | yes                  | non-inferior     | 4   | 2.5   | 1.8   | 1.45 |
| Jain et al.               | 2019 | India         | respirology         | yes          | composite | no                   | not non-inferior | 40  | 39.1  | 10    | 1.25 |
| Kollef et al.             | 2019 | international | infectious diseases | no           | single    | yes                  | non-inferior     | 20  | 25.3  | 10    | 1.5  |
| Nunn et al.               | 2019 | international | infectious diseases | no           | composite | no                   | non-inferior     | 30  | 20.2  | 10    | 1.33 |
| Watanabe et al.           | 2019 | Japan         | thrombosis          | not explicit | composite | yes                  | non-inferior     | 4.4 | 3.7   | 2.2   | 1.5  |
| Charbonnier et al.        | 1998 | international | thrombosis          | no           | composite | yes                  | non-inferior     | 7   | 7.2   | 5     | 1.71 |
| Colombo et al.            | 2014 | international | thrombosis          | no           | composite | yes                  | non-inferior     | 4.5 | 3.7   | 2     | 1.44 |
| Lassen et al.             | 2010 | international | thrombosis          | not explicit | composite | yes                  | non-inferior     | 16  | 24.37 | 5.6   | 1.35 |

|                                                                                            |      |               |                     |              |           |                      |                  |      |       |      |      |
|--------------------------------------------------------------------------------------------|------|---------------|---------------------|--------------|-----------|----------------------|------------------|------|-------|------|------|
| Lassen et al.                                                                              | 2009 | international | thrombosis          | no           | composite | yes                  | not non-inferior | 16   | 8.8   | 5.6  | 1.35 |
| Le Deley et al.                                                                            | 2014 | international | oncology            | yes          | composite | no                   | inconclusive     | 30   | 21.8  | 10   | 1.33 |
| Noguchi et al.                                                                             | 2016 | international | oncology            | no           | composite | yes                  | non-inferior     | 30   | 39.8  | 17.5 | 1.58 |
| Patte et al.                                                                               | 1991 | international | oncology            | yes          | composite | not explicit/unclear | non-inferior     | 10   | 10.7  | 15   | 2.5  |
| Platzbecker et al.                                                                         | 2017 | international | oncology            | no           | composite | no                   | non-inferior     | 15   | 13.2  | 5    | 1.33 |
| Raffi et al.                                                                               | 2014 | international | infectious diseases | no           | composite | yes                  | non-inferior     | 20   | 13.8  | 9    | 1.45 |
| Rubinstein et al.                                                                          | 2011 | international | infectious diseases | no           | composite | yes                  | non-inferior     | 40   | 40.5  | 20   | 1.5  |
| Schulman et al.                                                                            | 2009 | international | thrombosis          | no           | composite | yes                  | non-inferior     | 2    | 2.1   | 3.6  | 2.8  |
| Schulman et al.                                                                            | 2013 | international | thrombosis          | no           | composite | yes                  | non-inferior     | 2    | 1.3   | 2.8  | 2.4  |
| Seo et al.                                                                                 | 2014 | Korea         | gastroenterology    | yes          | composite | no                   | non-inferior     | 30   | na    | 10   | 1.33 |
| Continuous Infusion versus Double-Bolus Administration of Alteplase (COBALT) Investigators | 1997 | international | thrombosis          | not explicit | single    | yes                  | not non-inferior | 6.3  | 7.53  | 0.4  | 1.06 |
| Assessment of the Safety and Efficacy of a New Thrombolytic (ASSENT-2) Investigators       | 1999 | international | thrombosis          | no           | single    | yes                  | non-inferior     | 7.2  | 6.151 | 1    | 1.14 |
| Vilas-Boas et al.                                                                          | 2014 | Brazil        | infectious diseases | yes          | composite | no                   | non-inferior     | 20   | 23    | 9    | 1.45 |
| International Joint Efficacy Comparison of Thrombolytics (INJECT)                          | 1995 | international | thrombosis          | no           | single    | yes                  | non-inferior     | 2.7  | 9.53  | 2.1  | 1.78 |
| Nitz et al.                                                                                | 2019 | Germany       | oncology            | no           | composite | yes                  | non-inferior     | 28.9 | 10.2  | 4.4  | 1.15 |



Appendix C: Relationship between observed outcomes and estimated risks of outcome in control group

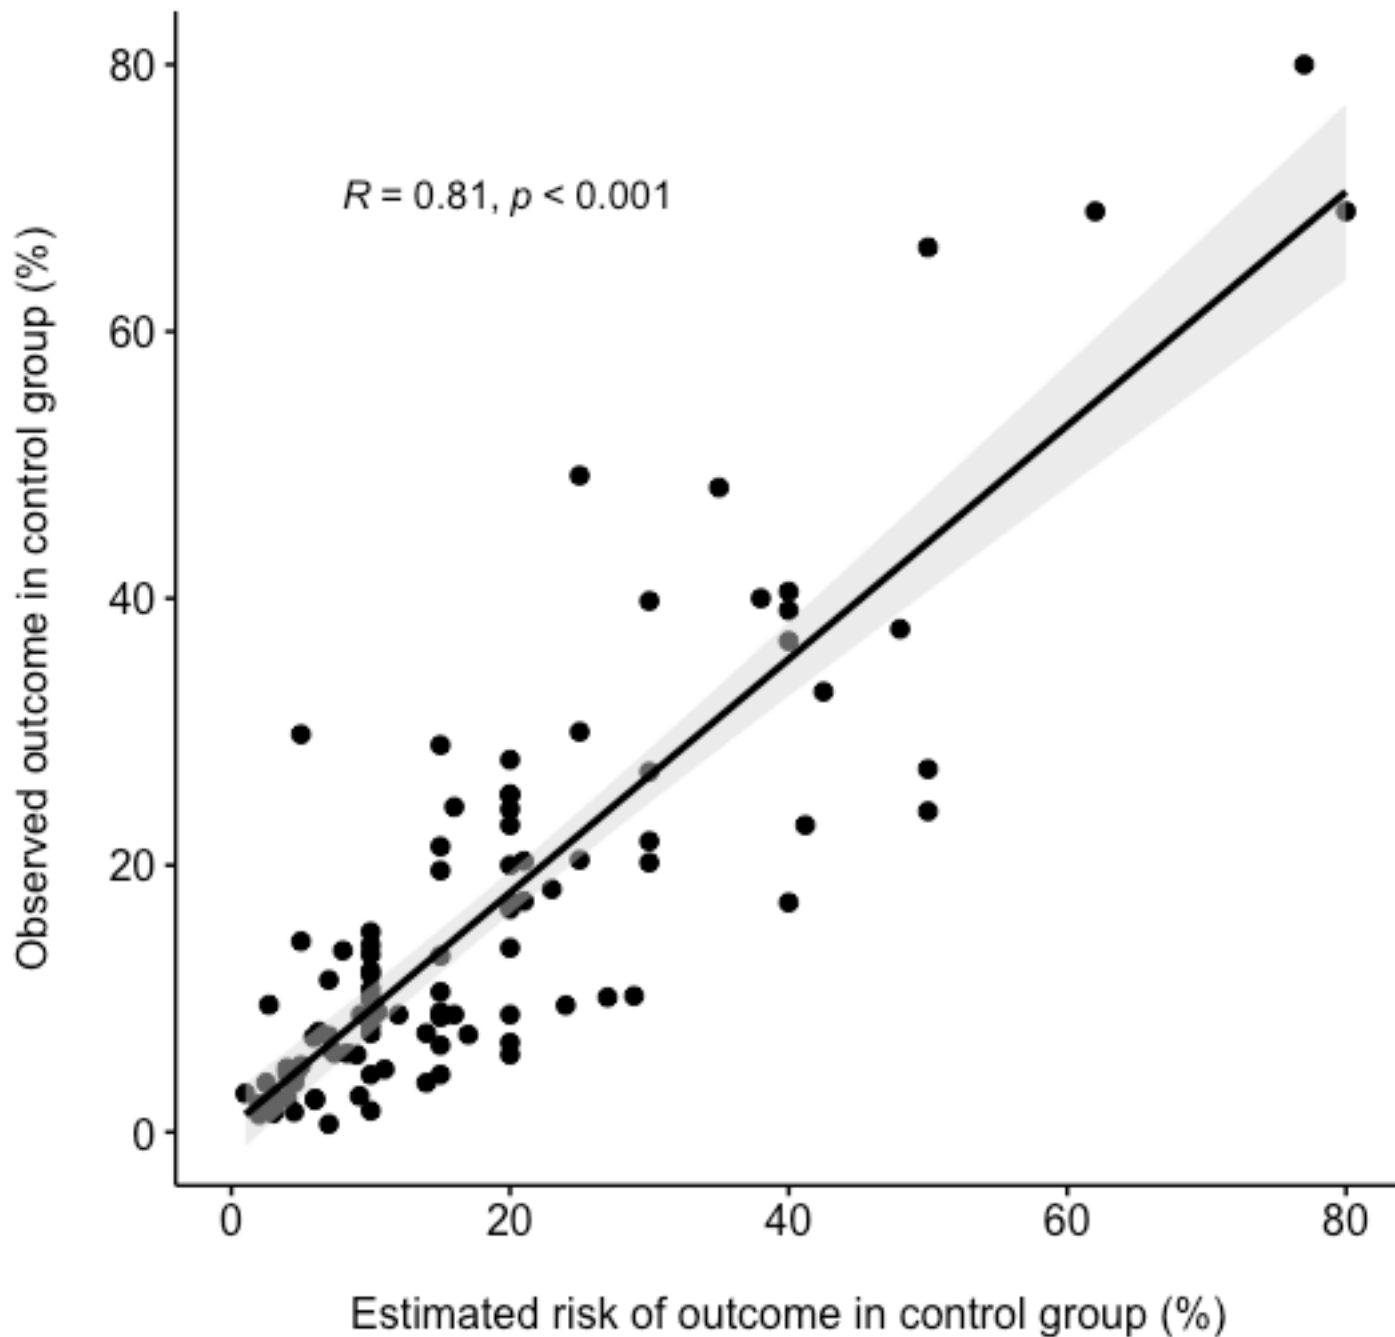

**Appendix D: Diagnostic plots for regression models**

**Absolute non-inferiority margins**

Absolute non-inferiority margin

Log-transformed absolute non-inferiority margin

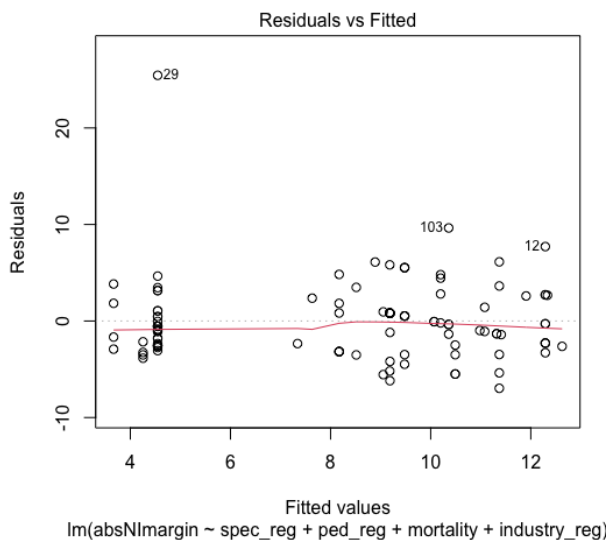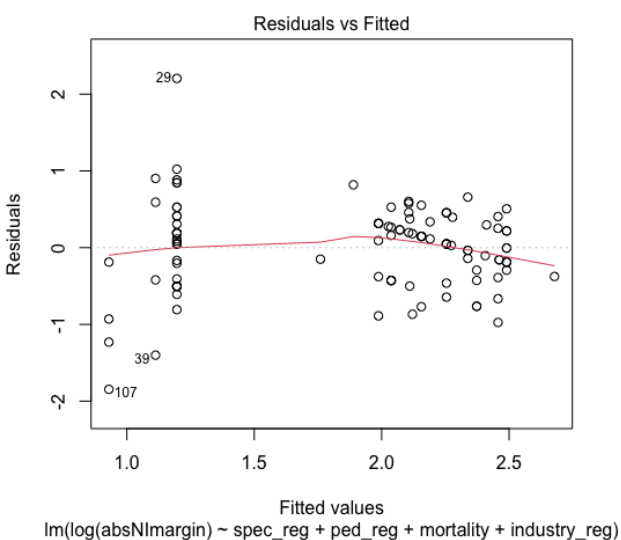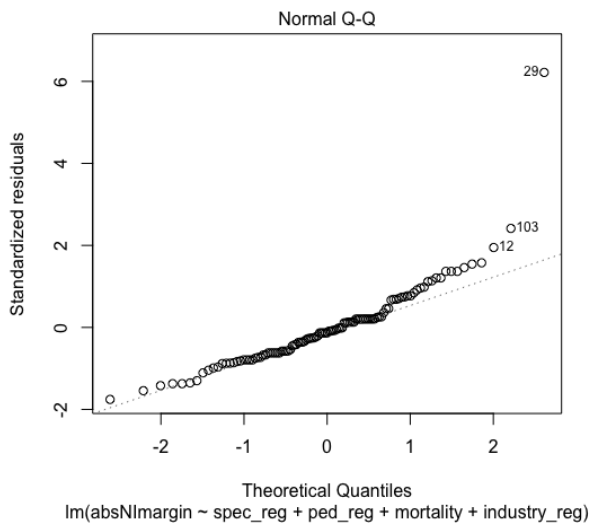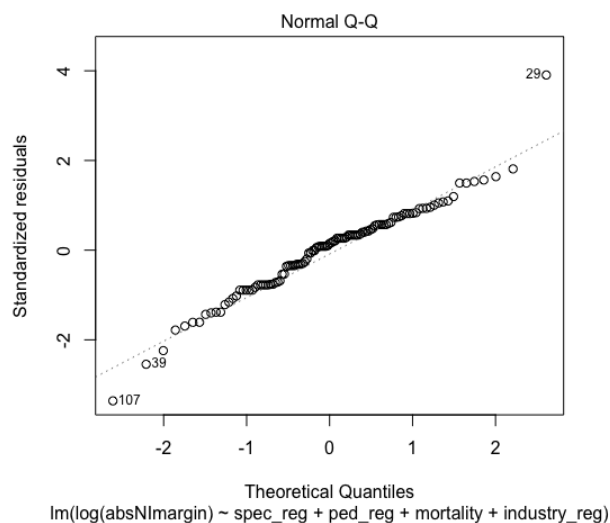

Absolute non-inferiority margin

Log-transformed absolute non-inferiority margin

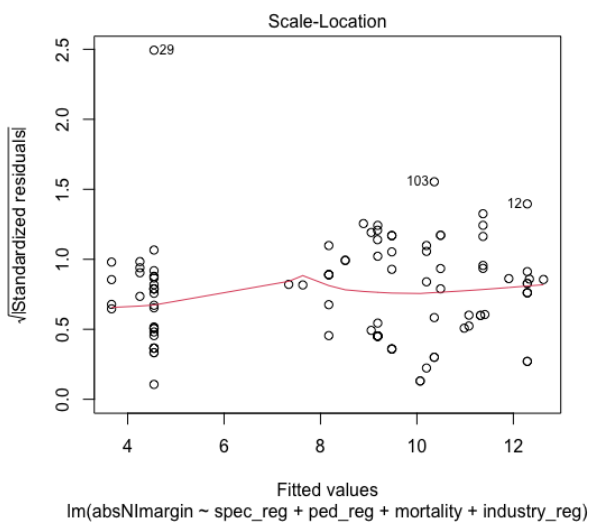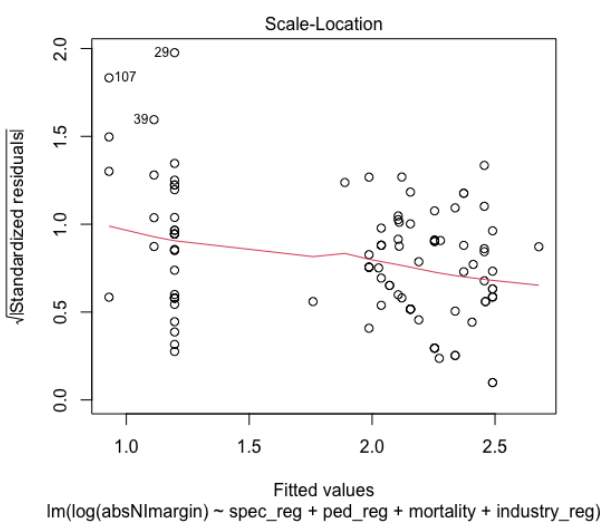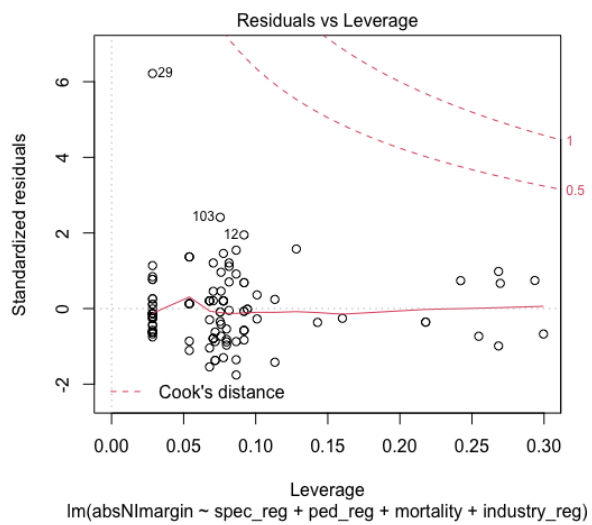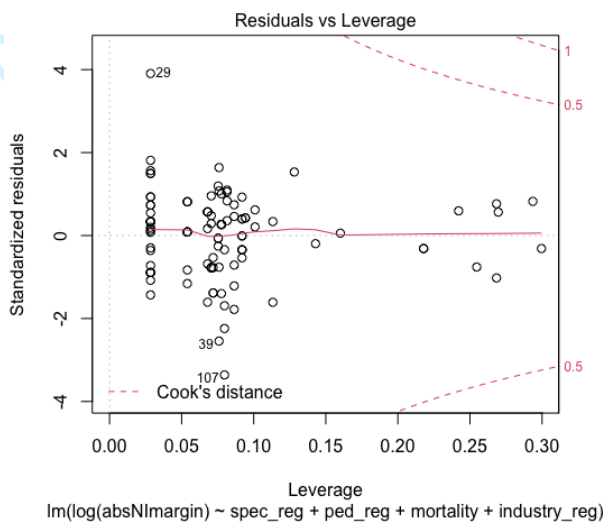

**Relative non-inferiority margins**

Relative non-inferiority margin

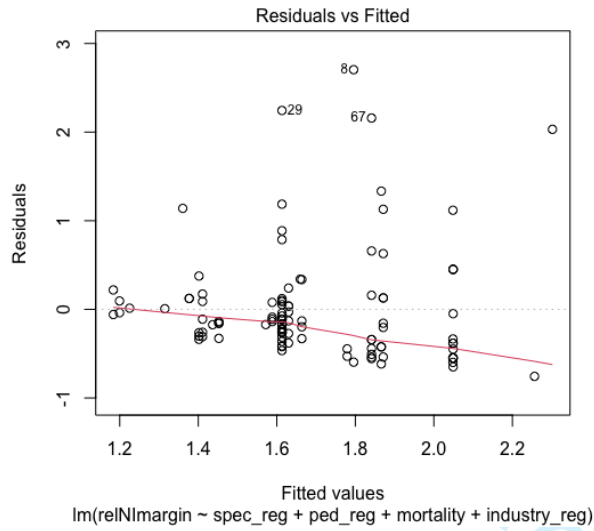

Log-transformed relative non-inferiority margin

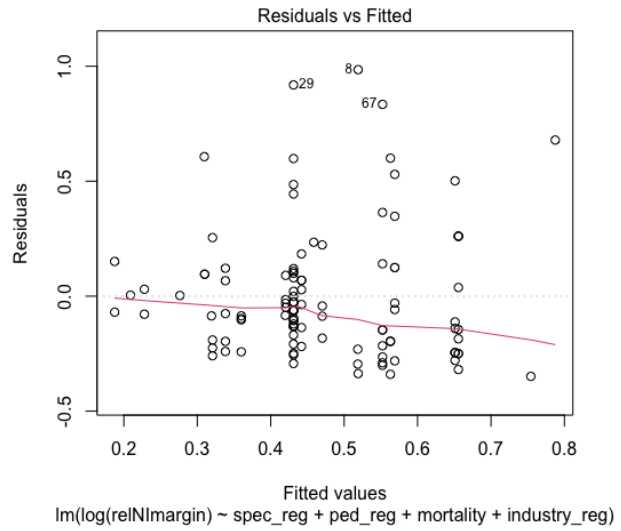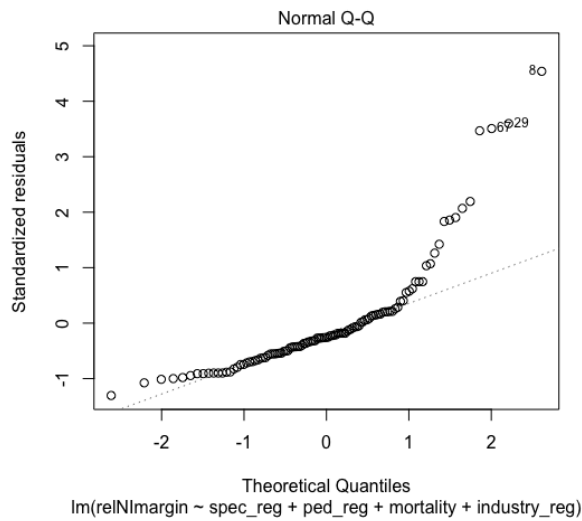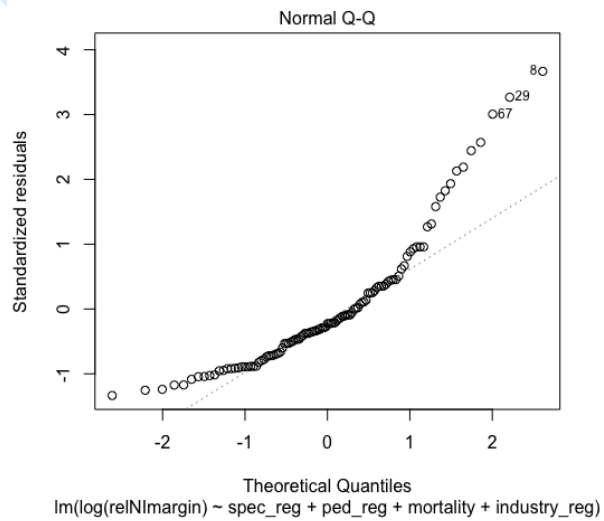

Relative non-inferiority margin

Log-transformed relative non-inferiority margin

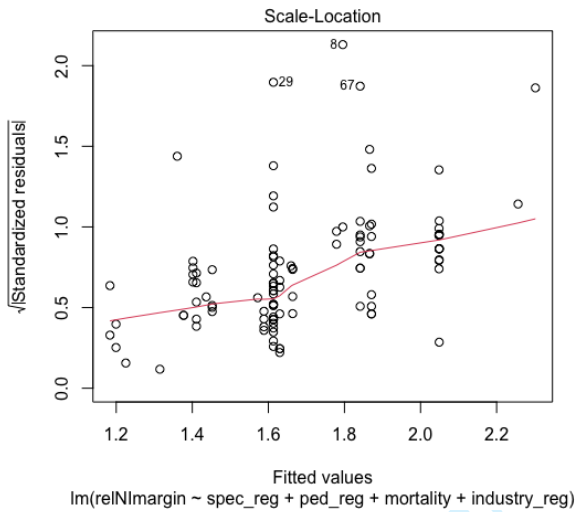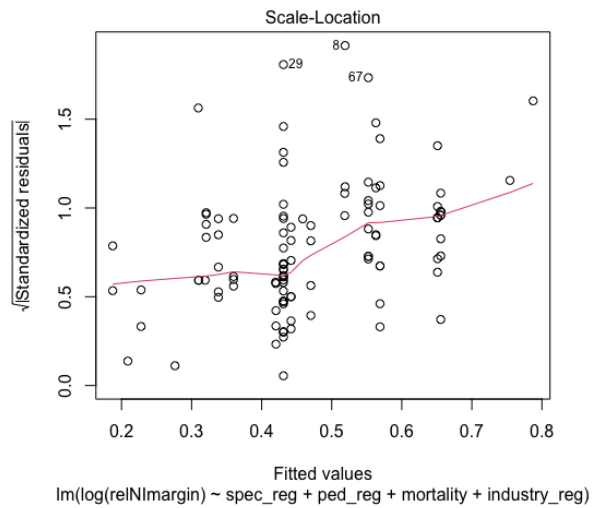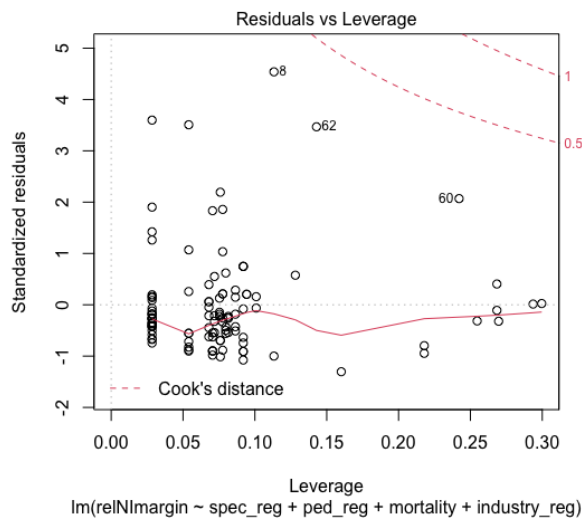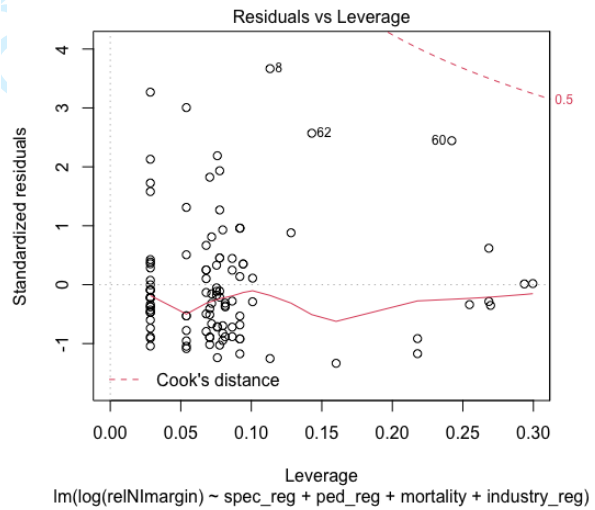



# PRISMA 2009 Checklist

| Section/topic                      | #  | Checklist item                                                                                                                                                                                                                                                                                              | Reported on page #             |
|------------------------------------|----|-------------------------------------------------------------------------------------------------------------------------------------------------------------------------------------------------------------------------------------------------------------------------------------------------------------|--------------------------------|
| <b>TITLE</b>                       |    |                                                                                                                                                                                                                                                                                                             |                                |
| Title                              | 1  | Identify the report as a systematic review, meta-analysis, or both.                                                                                                                                                                                                                                         | 1                              |
| <b>ABSTRACT</b>                    |    |                                                                                                                                                                                                                                                                                                             |                                |
| Structured summary                 | 2  | Provide a structured summary including, as applicable: background; objectives; data sources; study eligibility criteria, participants, and interventions; study appraisal and synthesis methods; results; limitations; conclusions and implications of key findings; systematic review registration number. | 2-3                            |
| <b>INTRODUCTION</b>                |    |                                                                                                                                                                                                                                                                                                             |                                |
| Rationale                          | 3  | Describe the rationale for the review in the context of what is already known.                                                                                                                                                                                                                              | 5-6                            |
| Objectives                         | 4  | Provide an explicit statement of questions being addressed with reference to participants, interventions, comparisons, outcomes, and study design (PICOS).                                                                                                                                                  | 6                              |
| <b>METHODS</b>                     |    |                                                                                                                                                                                                                                                                                                             |                                |
| Protocol and registration          | 5  | Indicate if a review protocol exists, if and where it can be accessed (e.g., Web address), and, if available, provide registration information including registration number.                                                                                                                               | n/a                            |
| Eligibility criteria               | 6  | Specify study characteristics (e.g., PICOS, length of follow-up) and report characteristics (e.g., years considered, language, publication status) used as criteria for eligibility, giving rationale.                                                                                                      | 7-8                            |
| Information sources                | 7  | Describe all information sources (e.g., databases with dates of coverage, contact with study authors to identify additional studies) in the search and date last searched.                                                                                                                                  | 6-7                            |
| Search                             | 8  | Present full electronic search strategy for at least one database, including any limits used, such that it could be repeated.                                                                                                                                                                               | Supplementary file: Appendix A |
| Study selection                    | 9  | State the process for selecting studies (i.e., screening, eligibility, included in systematic review, and, if applicable, included in the meta-analysis).                                                                                                                                                   | 8                              |
| Data collection process            | 10 | Describe method of data extraction from reports (e.g., piloted forms, independently, in duplicate) and any processes for obtaining and confirming data from investigators.                                                                                                                                  | 8                              |
| Data items                         | 11 | List and define all variables for which data were sought (e.g., PICOS, funding sources) and any assumptions and simplifications made.                                                                                                                                                                       | 8                              |
| Risk of bias in individual studies | 12 | Describe methods used for assessing risk of bias of individual studies (including specification of whether this was done at the study or outcome level), and how this information is to be used in any data synthesis.                                                                                      | n/a                            |
| Summary measures                   | 13 | State the principal summary measures (e.g., risk ratio, difference in means).                                                                                                                                                                                                                               | 9                              |
| Synthesis of results               | 14 | Describe the methods of handling data and combining results of studies, if done, including measures of consistency (e.g., $I^2$ ) for each meta-analysis.                                                                                                                                                   | 9-10                           |



# PRISMA 2009 Checklist

Page 1 of 2

| Section/topic                 | #  | Checklist item                                                                                                                                                                                           | Reported on page # |
|-------------------------------|----|----------------------------------------------------------------------------------------------------------------------------------------------------------------------------------------------------------|--------------------|
| Risk of bias across studies   | 15 | Specify any assessment of risk of bias that may affect the cumulative evidence (e.g., publication bias, selective reporting within studies).                                                             | n/a                |
| Additional analyses           | 16 | Describe methods of additional analyses (e.g., sensitivity or subgroup analyses, meta-regression), if done, indicating which were pre-specified.                                                         | n/a                |
| <b>RESULTS</b>                |    |                                                                                                                                                                                                          |                    |
| Study selection               | 17 | Give numbers of studies screened, assessed for eligibility, and included in the review, with reasons for exclusions at each stage, ideally with a flow diagram.                                          | 10,<br>Figure 1    |
| Study characteristics         | 18 | For each study, present characteristics for which data were extracted (e.g., study size, PICOS, follow-up period) and provide the citations.                                                             | 10                 |
| Risk of bias within studies   | 19 | Present data on risk of bias of each study and, if available, any outcome level assessment (see item 12).                                                                                                | n/a                |
| Results of individual studies | 20 | For all outcomes considered (benefits or harms), present, for each study: (a) simple summary data for each intervention group (b) effect estimates and confidence intervals, ideally with a forest plot. | 12                 |
| Synthesis of results          | 21 | Present results of each meta-analysis done, including confidence intervals and measures of consistency.                                                                                                  | 11-15              |
| Risk of bias across studies   | 22 | Present results of any assessment of risk of bias across studies (see Item 15).                                                                                                                          | n/a                |
| Additional analysis           | 23 | Give results of additional analyses, if done (e.g., sensitivity or subgroup analyses, meta-regression [see Item 16]).                                                                                    | n/a                |
| <b>DISCUSSION</b>             |    |                                                                                                                                                                                                          |                    |
| Summary of evidence           | 24 | Summarize the main findings including the strength of evidence for each main outcome; consider their relevance to key groups (e.g., healthcare providers, users, and policy makers).                     | 15-18              |
| Limitations                   | 25 | Discuss limitations at study and outcome level (e.g., risk of bias), and at review-level (e.g., incomplete retrieval of identified research, reporting bias).                                            | 18-19              |
| Conclusions                   | 26 | Provide a general interpretation of the results in the context of other evidence, and implications for future research.                                                                                  | 19                 |
| <b>FUNDING</b>                |    |                                                                                                                                                                                                          |                    |
| Funding                       | 27 | Describe sources of funding for the systematic review and other support (e.g., supply of data); role of funders for the systematic review.                                                               | n/a                |

From: Moher D, Liberati A, Tetzlaff J, Altman DG, The PRISMA Group (2009). Preferred Reporting Items for Systematic Reviews and Meta-Analyses: The PRISMA Statement. PLoS Med 6(7): e1000097. doi:10.1371/journal.pmed1000097

For more information, visit: [www.prisma-statement.org](http://www.prisma-statement.org)

For peer review only - <http://bmjopen.bmj.com/site/about/guidelines.xhtml>

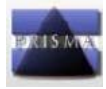

# PRISMA 2009 Checklist

For peer review only

- 1
- 2
- 3
- 4
- 5
- 6
- 7
- 8
- 9
- 10
- 11
- 12
- 13
- 14
- 15
- 16
- 17
- 18
- 19
- 20
- 21
- 22
- 23
- 24
- 25
- 26
- 27
- 28
- 29
- 30
- 31
- 32
- 33
- 34
- 35
- 36
- 37
- 38
- 39
- 40
- 41
- 42
- 43
- 44
- 45
- 46
- 47
