# Supplementary material for: Testing for non-inferior mortality: a systematic review of non-inferiority margin sizes and trial characteristics
Source: PubMed Central journal article supplement — BMJ Open. 2021 Apr 20;11(4):e044480. doi: 10.1136/bmjopen-2020-044480 (PMC8061825; doi:10.1136/bmjopen-2020-044480), 2021-04-20
Supplement: bmjopen-2020-044480supp001.pdf [file bmjopen-2020-044480supp001.pdf]

## Appendix A: Search strategy

### MEDLINE

|    | Searches                                                                                                                                                                                       | Results | Annotations |
|----|------------------------------------------------------------------------------------------------------------------------------------------------------------------------------------------------|---------|-------------|
| 1  | equivalence trial/                                                                                                                                                                             | 503     |             |
| 2  | equivalence trials as topic/                                                                                                                                                                   | 282     |             |
| 3  | (noninferiority or non-inferiority or equivalence or equivilency or<br>equivilencies or inferiority or "NI margin*" or "delta margin*" or<br>(prespecified adj2 margin*) or margins).ti,ab,kf. | 70165   |             |
| 4  | or/1-3                                                                                                                                                                                         | 70414   |             |
| 5  | mo.fs.                                                                                                                                                                                         | 561893  |             |
| 6  | (mortality or mortalities or death or deaths or dying or fatal*).ti,ab,kf.                                                                                                                     | 1493002 |             |
| 7  | mortality/ or cause of death/ or fatal outcome/ or hospital mortality/ or<br>infant mortality/ or maternal mortality/                                                                          | 213608  |             |
| 8  | or/5-7 [****mortality terms****]                                                                                                                                                               | 1834719 |             |
| 9  | 4 and 8 [****base clinical set****]                                                                                                                                                            | 9115    |             |
| 10 | randomized controlled trial.pt.                                                                                                                                                                | 500401  |             |
| 11 | controlled clinical trial.pt.                                                                                                                                                                  | 93574   |             |
| 12 | randomized.ab.                                                                                                                                                                                 | 469732  |             |
| 13 | placebo.ab.                                                                                                                                                                                    | 205181  |             |
| 14 | drug therapy.fs.                                                                                                                                                                               | 2180485 |             |
| 15 | randomly.ab.                                                                                                                                                                                   | 327066  |             |
| 16 | trial.ab.                                                                                                                                                                                      | 494306  |             |
| 17 | groups.ab.                                                                                                                                                                                     | 2008069 |             |
| 18 | or/10-17                                                                                                                                                                                       | 4632786 |             |

|    |                                                                                                                                           |         |
|----|-------------------------------------------------------------------------------------------------------------------------------------------|---------|
| 19 | exp animals/ not humans.sh.                                                                                                               | 4672546 |
| 20 | 18 not 19 [****Cochrane Handbook Highly Sensitive Search Strategy for 4014138 identifying randomized trials (Box 6.4.c 2008 version)****] |         |
| 21 | 9 and 20 [****Final results****]                                                                                                          | 3721    |
| 22 | limit 21 to (english language and humans and yr="1989 -Current")                                                                          | 3212    |

### Medline-in-Process

|    | Searches                                                                                                                                                                                 | Results | Annotations |
|----|------------------------------------------------------------------------------------------------------------------------------------------------------------------------------------------|---------|-------------|
| 1  | equivalenc*adj3 trial*.ti,ab,kf.                                                                                                                                                         | 0       |             |
| 2  | (noninferiority or non-inferiority or equivalence or equivilency or equivilencies or inferiority or "NI margin*" or "delta margin*" or (prespecified adj2 margin*) or margins).ti,ab,kf. | 70227   |             |
| 3  | or/1-2                                                                                                                                                                                   | 70227   |             |
| 4  | (mortality or mortalities or death or deaths or dying or fatal*).ti,ab,kf.                                                                                                               | 1493992 |             |
| 5  | 3 and 4 [****Base clinical set****]                                                                                                                                                      | 5800    |             |
| 6  | ((randomized or randomised or controlled) adj3 trial*).ti,ab,kf.                                                                                                                         | 401027  |             |
| 7  | placebo.ab.                                                                                                                                                                              | 205277  |             |
| 8  | randomly.ab.                                                                                                                                                                             | 327266  |             |
| 9  | trial.ab.                                                                                                                                                                                | 494765  |             |
| 10 | groups.ab.                                                                                                                                                                               | 2009271 |             |
| 11 | or/6-10 [***Trial terms***]                                                                                                                                                              | 2722197 |             |
| 12 | 5 and 11 [****Final results****]                                                                                                                                                         | 2313    |             |

### Medline Epubs Ahead of Print

|    | Searches                                                                                                                                                                                       | Results | Annotations |
|----|------------------------------------------------------------------------------------------------------------------------------------------------------------------------------------------------|---------|-------------|
| 1  | equivalenc*adj3 trial*.ti,ab,kf.                                                                                                                                                               | 0       |             |
| 2  | (noninferiority or non-inferiority or equivalence or equivalency or<br>equivilencies or inferiority or "NI margin*" or "delta margin*" or<br>(prespecified adj2 margin*) or margins).ti,ab,kf. | 70227   |             |
| 3  | or/1-2                                                                                                                                                                                         | 70227   |             |
| 4  | (mortality or mortalities or death or deaths or dying or fatal*).ti,ab,kf.                                                                                                                     | 1493992 |             |
| 5  | 3 and 4 [****Base clinical set****]                                                                                                                                                            | 5800    |             |
| 6  | ((randomized or randomised or controlled) adj3 trial*).ti,ab,kf.                                                                                                                               | 401027  |             |
| 7  | placebo.ab.                                                                                                                                                                                    | 205277  |             |
| 8  | randomly.ab.                                                                                                                                                                                   | 327266  |             |
| 9  | trial.ab.                                                                                                                                                                                      | 494765  |             |
| 10 | groups.ab.                                                                                                                                                                                     | 2009271 |             |
| 11 | or/6-10 [***Trial terms***]                                                                                                                                                                    | 2722197 |             |
| 12 | 5 and 11 [****Final results****]                                                                                                                                                               | 2313    |             |
| 13 | equivalenc*adj3 trial*.ti,ab,kf.                                                                                                                                                               | 0       |             |
| 14 | (noninferiority or non-inferiority or equivalence or equivalency or<br>equivilencies or inferiority or "NI margin*" or "delta margin*" or<br>(prespecified adj2 margin*) or margins).ti,ab,kf. | 70227   |             |
| 15 | or/13-14                                                                                                                                                                                       | 70227   |             |
| 16 | (mortality or mortalities or death or deaths or dying or fatal*).ti,ab,kf.                                                                                                                     | 1493992 |             |
| 17 | 15 and 16 [****Base clinical set****]                                                                                                                                                          | 5800    |             |
| 18 | ((randomized or randomised or controlled) adj3 trial*).ti,ab,kf.                                                                                                                               | 401027  |             |
| 19 | placebo.ab.                                                                                                                                                                                    | 205277  |             |

|    |                                   |         |
|----|-----------------------------------|---------|
| 20 | randomly.ab.                      | 327266  |
| 21 | trial.ab.                         | 494765  |
| 22 | groups.ab.                        | 2009271 |
| 23 | or/18-22 [***Trial terms***]      | 2722197 |
| 24 | 17 and 23 [****Final results****] | 2313    |

### Embase Classic+Embase databases (OvidSP)

|    | Searches                                                                                                                                                                               | Results | Annotations |
|----|----------------------------------------------------------------------------------------------------------------------------------------------------------------------------------------|---------|-------------|
| 1  | equivalenc*adj3 trial*.ti,ab,kf.                                                                                                                                                       | 0       |             |
| 2  | (noninferiority or non-inferiority or equivalence or equivlency or equivlencies or inferiority or "NI margin*" or "delta margin*" or (prespecified adj2 margin*) or margins).ti,ab,kf. | 70227   |             |
| 3  | or/1-2                                                                                                                                                                                 | 70227   |             |
| 4  | (mortality or mortalities or death or deaths or dying or fatal*).ti,ab,kf.                                                                                                             | 1493992 |             |
| 5  | 3 and 4 [****Base clinical set****]                                                                                                                                                    | 5800    |             |
| 6  | ((randomized or randomised or controlled) adj3 trial*).ti,ab,kf.                                                                                                                       | 401027  |             |
| 7  | placebo.ab.                                                                                                                                                                            | 205277  |             |
| 8  | randomly.ab.                                                                                                                                                                           | 327266  |             |
| 9  | trial.ab.                                                                                                                                                                              | 494765  |             |
| 10 | groups.ab.                                                                                                                                                                             | 2009271 |             |
| 11 | or/6-10 [***Trial terms***]                                                                                                                                                            | 2722197 |             |
| 12 | 5 and 11 [****Final results****]                                                                                                                                                       | 2313    |             |
| 13 | equivalenc*adj3 trial*.ti,ab,kf.                                                                                                                                                       | 0       |             |

|    |                                                                                                                                                                                                                                          |         |
|----|------------------------------------------------------------------------------------------------------------------------------------------------------------------------------------------------------------------------------------------|---------|
| 14 | (noninferiority or non-inferiority or equivalence or equivilency or equivilencies or inferiority or "NI margin*" or "delta margin*" or (prespecified adj2 margin*) or margins).ti,ab,kf.                                                 | 70227   |
| 15 | or/13-14                                                                                                                                                                                                                                 | 70227   |
| 16 | (mortality or mortalities or death or deaths or dying or fatal*).ti,ab,kf.                                                                                                                                                               | 1493992 |
| 17 | 15 and 16 [****Base clinical set****]                                                                                                                                                                                                    | 5800    |
| 18 | ((randomized or randomised or controlled) adj3 trial*).ti,ab,kf.                                                                                                                                                                         | 401027  |
| 19 | placebo.ab.                                                                                                                                                                                                                              | 205277  |
| 20 | randomly.ab.                                                                                                                                                                                                                             | 327266  |
| 21 | trial.ab.                                                                                                                                                                                                                                | 494765  |
| 22 | groups.ab.                                                                                                                                                                                                                               | 2009271 |
| 23 | or/18-22 [***Trial terms***]                                                                                                                                                                                                             | 2722197 |
| 24 | 17 and 23 [****Final results****]                                                                                                                                                                                                        | 2313    |
| 25 | (equivalen* adj2 trial*).ti,ab.                                                                                                                                                                                                          | 758     |
| 26 | (noninferiority or non-inferiority or equivalence or equivilency or equivilencies or inferiority or "NI margin*" or "delta margin*" or (prespecified adj2 margin*) or margins).ti,ab.                                                    | 69786   |
| 27 | or/25-26 [***equivalency or non-inferiority terms****]                                                                                                                                                                                   | 69985   |
| 28 | (mortality or mortalities or death or deaths or dying or fatal*).ti,ab.                                                                                                                                                                  | 1473665 |
| 29 | mortality/ or cancer mortality/ or childhood mortality/ or embryo mortality/ or fetus mortality/ or infant mortality/ or maternal mortality/ or prenatal mortality/ or surgical mortality/ or perinatal mortality/ or newborn mortality/ | 77281   |
| 30 | death/ or "cause of death"/ or dying/ or heart death/ or sudden death/ or child death/ or newborn death/                                                                                                                                 | 75385   |
| 31 | or/28-30 [****mortality terms****]                                                                                                                                                                                                       | 1511412 |

|    |                                                                                                         |         |
|----|---------------------------------------------------------------------------------------------------------|---------|
| 32 | 27 and 31 [****Base clinical set****]                                                                   | 5823    |
| 33 | randomized controlled trial/                                                                            | 500622  |
| 34 | double-blind procedure/                                                                                 | 0       |
| 35 | single-blind procedure/                                                                                 | 0       |
| 36 | crossover-procedure/                                                                                    | 0       |
| 37 | random*.ti,ab,kw.                                                                                       | 1109854 |
| 38 | factorial*.ti,ab,kw.                                                                                    | 29313   |
| 39 | crossover*.ti,ab,kw.                                                                                    | 62938   |
| 40 | "cross over".ti,ab,kw.                                                                                  | 22789   |
| 41 | "cross-over*".ti,ab,kw.                                                                                 | 23015   |
| 42 | placebo*.ti,ab,kw.                                                                                      | 212808  |
| 43 | (doubl* adj5 blind*).ti,ab,kw.                                                                          | 149043  |
| 44 | (singl* adj5 blind*).ti,ab,kw.                                                                          | 22640   |
| 45 | assign*.ti,ab,kw.                                                                                       | 308920  |
| 46 | allocat*.ti,ab,kw.                                                                                      | 115873  |
| 47 | volunteer*.ti,ab,kw.                                                                                    | 189496  |
| 48 | or/33-47 [****Cochrane Box 6.3.2.2 EMBASE sensitive<br>TherapyTreatment Effectiveness Filter terms****] | 1731635 |
| 49 | 32 and 48 [***Cochrane trial filter****]                                                                | 1802    |
| 50 | ct.fs.                                                                                                  | 0       |
| 51 | 32 and 50 [***clinical trial subheading****]                                                            | 0       |
| 52 | limit 32 to (randomized controlled trial or controlled clinical trial or<br>multicenter study)          | 1230    |

|    |                                                                                                                                                                               |      |
|----|-------------------------------------------------------------------------------------------------------------------------------------------------------------------------------|------|
| 53 | or/49,51-52 [****Final results****]                                                                                                                                           | 1974 |
| 54 | limit 53 to conference abstract [Limit not valid in Ovid MEDLINE(R),Ovid MEDLINE(R) Daily Update,Ovid MEDLINE(R) In-Process,Ovid MEDLINE(R) Publisher; records were retained] | 1974 |
| 55 | 53 not 54 [***Conference abstracts removed****]                                                                                                                               | 0    |
| 56 | limit 55 to (human and english language and yr="1989 -Current")                                                                                                               | 0    |
