# Supplementary material for: Testing for non-inferior mortality: a systematic review of non-inferiority margin sizes and trial characteristics
Source: PubMed Central journal article supplement — BMJ Open. 2021 Apr 20;11(4):e044480. doi: 10.1136/bmjopen-2020-044480 (PMC8061825; doi:10.1136/bmjopen-2020-044480), 2021-04-20
Supplement: bmjopen-2020-044480supp002.pdf [file bmjopen-2020-044480supp002.pdf]

## Appendix B: Non-inferiority trials

| Author                                         | Year | Country       | Specialty           | Pediatric patients included | Mortality as single or composite outcome | Industry funding     | Conclusion       | Estimated risk of event in control (%) | Observed event in control (%) | Absolute non-inferiority margin (% difference) | Relative non-inferiority margin |
|------------------------------------------------|------|---------------|---------------------|-----------------------------|------------------------------------------|----------------------|------------------|----------------------------------------|-------------------------------|------------------------------------------------|---------------------------------|
| African Neonatal Sepsis Trial (AFRINEST) group | 2015 | international | infectious diseases | yes                         | composite                                | no                   | non-inferior     | 10                                     | 8                             | 5                                              | 1.5                             |
| Ahn et al.                                     | 2013 | Korea         | oncology            | no                          | single                                   | not explicit/unclear | non-inferior     | 41.2                                   | 23                            | 13                                             | 1.32                            |
| Aliberti et al.                                | 2017 | Italy         | infectious diseases | no                          | composite                                | no                   | stopped early    | 10                                     | 7.4                           | 5                                              | 1.5                             |
| Baqui et al.                                   | 2015 | Bangladesh    | infectious diseases | yes                         | composite                                | no                   | non-inferior     | 10                                     | 10                            | 5                                              | 1.5                             |
| Bertrand et al.                                | 2006 | Canada        | thrombosis          | no                          | composite                                | yes                  | non-inferior     | 23                                     | 18.2                          | 8                                              | 1.35                            |
| Beyer-Westendorf et al.                        | 2017 | Germany       | thrombosis          | no                          | composite                                | yes                  | non-inferior     | 3                                      | 1.7                           | 4.5                                            | 2.5                             |
| Borchmann et al.                               | 2017 | international | oncology            | no                          | composite                                | yes                  | non-inferior     | 12                                     | 8.8                           | 6                                              | 1.5                             |
| Brack et al.                                   | 2012 | international | infectious diseases | yes                         | composite                                | yes                  | not non-inferior | 1                                      | 2.9                           | 3.5                                            | 4.5                             |
| Budde et al.                                   | 2014 | international | transplant          | no                          | composite                                | yes                  | non-inferior     | 15                                     | 19.6                          | 10                                             | 1.67                            |
| The Matisse Investigators                      | 2003 | international | thrombosis          | no                          | composite                                | yes                  | non-inferior     | 5                                      | 5                             | 3.5                                            | 1.7                             |
| Bunnapradist et al.                            | 2013 | international | transplant          | no                          | composite                                | yes                  | non-inferior     | 6                                      | 2.5                           | 9                                              | 2.5                             |
| Cai et al.                                     | 2014 | China         | transplant          | no                          | composite                                | yes                  | non-inferior     | 20                                     | 16.7                          | 20                                             | 2                               |
| Chastre et al.                                 | 2003 | France        | infectious diseases | no                          | single                                   | no                   | non-inferior     | 40                                     | 17.2                          | 10                                             | 1.25                            |
| Cordonnier et al.                              | 2009 | France        | infectious diseases | no                          | single                                   | no                   | non-inferior     | 9.2                                    | 2.7                           | 8                                              | 1.87                            |
| de Kraker et al.                               | 2004 | international | oncology            | yes                         | composite                                | no                   | non-inferior     | 15                                     | 8.6                           | 10                                             | 1.67                            |
| De Simone et al.                               | 2012 | international | transplant          | no                          | composite                                | yes                  | non-inferior     | 24                                     | 9.5                           | 12                                             | 1.5                             |
| Diener et al.                                  | 2006 | international | thrombosis          | no                          | composite                                | yes                  | non-inferior     | 9.3                                    | 8.8                           | 5                                              | 1.54                            |
| Eckardt et al.                                 | 2006 | international | oncology            | no                          | single                                   | yes                  | non-inferior     | 62                                     | 69                            | 10                                             | 1.16                            |
| Eriksson et al.                                | 2011 | international | thrombosis          | no                          | composite                                | yes                  | non-inferior     | 20                                     | 8.8                           | 7.7                                            | 1.39                            |
| Eriksson et al.                                | 2007 | international | thrombosis          | no                          | composite                                | yes                  | non-inferior     | 48                                     | 37.7                          | 9.2                                            | 1.19                            |

|                    |      |               |                     |              |           |                      |                  |      |      |      |      |
|--------------------|------|---------------|---------------------|--------------|-----------|----------------------|------------------|------|------|------|------|
| Eriksson et al.    | 2007 | international | thrombosis          | no           | composite | yes                  | non-inferior     | 20   | 6.7  | 7.7  | 1.39 |
| Feres et al.       | 2013 | Brazil        | thrombosis          | no           | composite | yes                  | non-inferior     | 9    | 5.8  | 2.7  | 1.3  |
| Ferre et al.       | 2017 | international | oncology            | yes          | composite | no                   | non-inferior     | 10   | 10.1 | 10   | 2    |
| Gaston et al.      | 2009 | US            | transplant          | yes          | composite | yes                  | non-inferior     | 20   | 27.9 | 10   | 1.5  |
| Giamarellou et al. | 2000 | Greece        | infectious diseases | no           | composite | not explicit/unclear | non-inferior     | 25   | 49.2 | 10   | 1.4  |
| Gilard et al.      | 2015 | international | thrombosis          | no           | composite | yes                  | non-inferior     | 3    | 1.5  | 2    | 1.67 |
| Gulizia et al.     | 2008 | Italy         | cardiology          | no           | composite | not explicit/unclear | non-inferior     | 38   | 40   | 10   | 1.26 |
| Gwon et al.        | 2012 | Korea         | thrombosis          | no           | composite | yes                  | non-inferior     | 10   | 4.3  | 4    | 1.4  |
| Sibbing et al.     | 2017 | international | thrombosis          | no           | composite | yes                  | non-inferior     | 10.5 | 9    | 30   | 3.86 |
| Han et al.         | 2016 | China         | thrombosis          | no           | composite | yes                  | non-inferior     | 8.3  | 5.9  | 3.7  | 1.45 |
| Harris et al.      | 2018 | international | infectious diseases | no           | single    | no                   | not non-inferior | 14   | 3.7  | 5    | 1.36 |
| Hofheinz et al.    | 2012 | Germany       | oncology            | no           | single    | yes                  | non-inferior     | 42.5 | 33   | 12.5 | 1.29 |
| Huh et al.         | 2017 | Korea         | transplant          | no           | composite | yes                  | non-inferior     | 10   | 13.3 | 15   | 2.5  |
| Iversen et al.     | 2019 | Denmark       | infectious diseases | no           | composite | no                   | non-inferior     | 10   | 12.1 | 10   | 2    |
| Jeng et al.        | 2018 | international | transplant          | no           | composite | yes                  | non-inferior     | 20   | 5.8  | 12   | 1.6  |
| Johnson et al.     | 2016 | international | oncology            | no           | composite | no                   | not non-inferior | 5    | 14.3 | 5    | 2    |
| Jones et al.       | 2016 | Canada        | anesthesia          | no           | composite | no                   | non-inferior     | 25   | 30   | 10   | 1.4  |
| Kim et al.         | 2012 | Korea         | thrombosis          | no           | composite | yes                  | non-inferior     | 11   | 4.7  | 4    | 1.36 |
| Park et al.        | 2013 | Korea         | thrombosis          | no           | composite | no                   | non-inferior     | 3    | 1.4  | 0.75 | 1.25 |
| Hahn et al.        | 2018 | Korea         | thrombosis          | no           | composite | yes                  | non-inferior     | 4.5  | 4.2  | 2    | 1.44 |
| Kirchhof et al.    | 2012 | Germany       | cardiology          | no           | composite | yes                  | not non-inferior | 29.8 | na   | 12   | 1.4  |
| Kirchhof et al.    | 2018 | international | thrombosis          | no           | composite | no                   | non-inferior     | 17   | 7.3  | 7.5  | 1.44 |
| Kutner et al.      | 2015 | US            | cardiology          | no           | single    | no                   | not non-inferior | 21   | 20.3 | 5    | 1.24 |
| Le et al.          | 2017 | Vietnam       | infectious diseases | no           | single    | no                   | non-inferior     | 15   | 6.5  | 10   | 1.67 |
| Lee et al.         | 2018 | Korea         | thrombosis          | no           | composite | yes                  | non-inferior     | 7    | 0.6  | 4    | 1.57 |
| Lee et al.         | 2009 | UK            | oncology            | not explicit | single    | no                   | non-inferior     | 80   | 69   | 10   | 1.13 |

|                         |      |               |                     |     |           |                      |                  |     |       |      |      |
|-------------------------|------|---------------|---------------------|-----|-----------|----------------------|------------------|-----|-------|------|------|
| Liu et al.              | 2013 | China         | oncology            | yes | single    | no                   | stopped early    | 15  | na    | 15   | 2    |
| Maertens et al.         | 2016 | international | infectious diseases | no  | single    | yes                  | non-inferior     | 20  | 20    | 10   | 1.5  |
| Mai et al.              | 2016 | international | oncology            | no  | composite | yes                  | non-inferior     | 50  | na    | 15   | 1.3  |
| Matsumura-Nakano et al. | 2019 | Japan         | thrombosis          | no  | composite | yes                  | not non-inferior | 8   | 13.6  | 4    | 1.5  |
| Mavroudis et al.        | 2016 | Greece        | oncology            | no  | composite | no                   | not non-inferior | 15  | 10.5  | 7    | 1.47 |
| Mavroudis et al.        | 2015 | Greece        | oncology            | no  | composite | no                   | not non-inferior | 15  | 4.3   | 8    | 1.53 |
| Merle et al.            | 2014 | international | infectious diseases | no  | composite | no                   | not non-inferior | 20  | 17.2  | 6    | 1.3  |
| Mesu et al.             | 2018 | international | infectious diseases | yes | composite | no                   | non-inferior     | 6   | 2.4   | 13   | 3.17 |
| Meynard et al.          | 2018 | France        | infectious diseases | no  | composite | yes                  | not non-inferior | 15  | 29    | 10   | 1.67 |
| Mir et al.              | 2017 | Pakistan      | infectious diseases | yes | composite | no                   | non-inferior     | 10  | 11.8  | 5    | 1.5  |
| Molloy et al.           | 2018 | international | infectious diseases | no  | single    | no                   | non-inferior     | 15  | 21.4  | 10   | 1.67 |
| Nakamura et al.         | 2017 | Japan         | thrombosis          | no  | composite | no                   | non-inferior     | 4.5 | 1.5   | 2    | 1.44 |
| Nathan et al.           | 2005 | Niger         | infectious diseases | yes | composite | no                   | non-inferior     | 15  | 9     | 10   | 1.67 |
| Park et al.             | 2014 | Korea         | gastroenterology    | no  | single    | no                   | not non-inferior | 10  | na    | 15   | 2.5  |
| Paul et al.             | 2015 | Israel        | infectious diseases | no  | composite | no                   | not non-inferior | 30  | 27    | 15   | 1.5  |
| Ponticelli et al.       | 2014 | Italy         | transplant          | no  | composite | not explicit/unclear | inconclusive     | 3   | 2.8   | 10   | 4.33 |
| Postma et al.           | 2015 | Netherlands   | infectious diseases | no  | single    | no                   | non-inferior     | 5   | na    | 3    | 1.6  |
| Pritchard-Jones et al.  | 2015 | international | oncology            | yes | composite | no                   | non-inferior     | 14  | 7.4   | 10   | 1.71 |
| Pujade-Lauraine et al.  | 2010 | international | oncology            | no  | composite | yes                  | non-inferior     | 77  | 80    | 7.9  | 1.1  |
| Qazi et al.             | 2017 | international | transplant          | no  | composite | yes                  | not non-inferior | 25  | 20.4  | 10   | 1.4  |
| Reynolds et al.         | 2010 | Uganda        | infectious diseases | no  | composite | no                   | non-inferior     | 5   | 29.8  | 15   | 4    |
| Riess et al.            | 2010 | Germany       | thrombosis          | no  | composite | yes                  | non-inferior     | 4.7 | 4.52  | 3.45 | 1.73 |
| Russ et al.             | 2013 | international | transplant          | no  | composite | yes                  | unclear          | 10  | 14    | 15   | 2.5  |
| Schrappe et al.         | 2018 | international | oncology            | yes | composite | no                   | not non-inferior | 4   | 4.4   | 4    | 2    |
| Schroder et al.         | 2004 | international | oncology            | no  | single    | no                   | inconclusive     | 50  | 24.04 | 15   | 1.3  |

|                           |      |               |                     |              |           |                      |                  |     |       |       |      |
|---------------------------|------|---------------|---------------------|--------------|-----------|----------------------|------------------|-----|-------|-------|------|
| Schulz-Schupke et al.     | 2015 | international | thrombosis          | no           | composite | yes                  | stopped early    | 10  | 1.6   | 2     | 1.2  |
| Tedesco Silva et al.      | 2010 | international | transplant          | no           | composite | yes                  | non-inferior     | 20  | 24.2  | 10    | 1.5  |
| Sinha et al.              | 2005 | international | respirology         | yes          | single    | yes                  | non-inferior     | 45  | na    | 14.5  | 1.32 |
| Stabile et al.            | 2008 | Italy         | thrombosis          | not explicit | composite | not explicit/unclear | non-inferior     | 2.5 | 3.7   | 5.5   | 3.2  |
| Stellbrink et al.         | 2004 | Germany       | thrombosis          | no           | composite | yes                  | non-inferior     | 4   | 4.8   | 2     | 1.5  |
| Stets et al.              | 2019 | international | infectious diseases | no           | composite | yes                  | non-inferior     | 21  | 17.3  | 10    | 1.48 |
| Stone et al.              | 2007 | international | thrombosis          | no           | composite | yes                  | not non-inferior | 5.9 | 7.1   | 1.48  | 1.25 |
| Swaminathan et al.        | 2011 | India         | infectious diseases | no           | composite | no                   | not non-inferior | 10  | 15    | 15    | 2.5  |
| The GUSTO V Investigators | 2001 | international | thrombosis          | no           | single    | yes                  | non-inferior     | 7.4 | 5.9   | 0.74  | 1.1  |
| Turpie et al.             | 2009 | international | thrombosis          | no           | composite | yes                  | non-inferior     | 27  | 10.1  | 4     | 1.15 |
| Walsh et al.              | 2004 | international | infectious diseases | yes          | composite | yes                  | non-inferior     | 50  | 66.3  | 10    | 1.2  |
| Willenheimer et al.       | 2005 | international | cardiology          | no           | composite | yes                  | not non-inferior | 40  | 36.8  | 5     | 1.13 |
| Yahav et al.              | 2019 | international | infectious diseases | no           | composite | not explicit/unclear | non-inferior     | 35  | 48.3  | 10    | 1.29 |
| Yakoub-Agha et al.        | 2012 | international | oncology            | no           | single    | not explicit/unclear | inconclusive     | 50  | 27.2  | 14.64 | 1.29 |
| Yang et al.               | 2018 | China         | oncology            | yes          | composite | no                   | non-inferior     | 5   | na    | 10    | 3    |
| Daniels et al.            | 2019 | South Africa  | infectious diseases | yes          | composite | no                   | non-inferior     | 7   | 11.4  | 5     | 1.71 |
| Cisneros et al.           | 2019 | international | infectious diseases | no           | single    | no                   | not non-inferior | 20  | 25.3  | 10    | 1.5  |
| Hahn et al.               | 2019 | Korea         | thrombosis          | no           | composite | yes                  | non-inferior     | 4   | 2.5   | 1.8   | 1.45 |
| Jain et al.               | 2019 | India         | respirology         | yes          | composite | no                   | not non-inferior | 40  | 39.1  | 10    | 1.25 |
| Kollef et al.             | 2019 | international | infectious diseases | no           | single    | yes                  | non-inferior     | 20  | 25.3  | 10    | 1.5  |
| Nunn et al.               | 2019 | international | infectious diseases | no           | composite | no                   | non-inferior     | 30  | 20.2  | 10    | 1.33 |
| Watanabe et al.           | 2019 | Japan         | thrombosis          | not explicit | composite | yes                  | non-inferior     | 4.4 | 3.7   | 2.2   | 1.5  |
| Charbonnier et al.        | 1998 | international | thrombosis          | no           | composite | yes                  | non-inferior     | 7   | 7.2   | 5     | 1.71 |
| Colombo et al.            | 2014 | international | thrombosis          | no           | composite | yes                  | non-inferior     | 4.5 | 3.7   | 2     | 1.44 |
| Lassen et al.             | 2010 | international | thrombosis          | not explicit | composite | yes                  | non-inferior     | 16  | 24.37 | 5.6   | 1.35 |

|                                                                                            |      |               |                     |              |           |                      |                  |      |       |      |      |
|--------------------------------------------------------------------------------------------|------|---------------|---------------------|--------------|-----------|----------------------|------------------|------|-------|------|------|
| Lassen et al.                                                                              | 2009 | international | thrombosis          | no           | composite | yes                  | not non-inferior | 16   | 8.8   | 5.6  | 1.35 |
| Le Deley et al.                                                                            | 2014 | international | oncology            | yes          | composite | no                   | inconclusive     | 30   | 21.8  | 10   | 1.33 |
| Noguchi et al.                                                                             | 2016 | international | oncology            | no           | composite | yes                  | non-inferior     | 30   | 39.8  | 17.5 | 1.58 |
| Patte et al.                                                                               | 1991 | international | oncology            | yes          | composite | not explicit/unclear | non-inferior     | 10   | 10.7  | 15   | 2.5  |
| Platzbecker et al.                                                                         | 2017 | international | oncology            | no           | composite | no                   | non-inferior     | 15   | 13.2  | 5    | 1.33 |
| Raffi et al.                                                                               | 2014 | international | infectious diseases | no           | composite | yes                  | non-inferior     | 20   | 13.8  | 9    | 1.45 |
| Rubinstein et al.                                                                          | 2011 | international | infectious diseases | no           | composite | yes                  | non-inferior     | 40   | 40.5  | 20   | 1.5  |
| Schulman et al.                                                                            | 2009 | international | thrombosis          | no           | composite | yes                  | non-inferior     | 2    | 2.1   | 3.6  | 2.8  |
| Schulman et al.                                                                            | 2013 | international | thrombosis          | no           | composite | yes                  | non-inferior     | 2    | 1.3   | 2.8  | 2.4  |
| Seo et al.                                                                                 | 2014 | Korea         | gastroenterology    | yes          | composite | no                   | non-inferior     | 30   | na    | 10   | 1.33 |
| Continuous Infusion versus Double-Bolus Administration of Alteplase (COBALT) Investigators | 1997 | international | thrombosis          | not explicit | single    | yes                  | not non-inferior | 6.3  | 7.53  | 0.4  | 1.06 |
| Assessment of the Safety and Efficacy of a New Thrombolytic (ASSENT-2) Investigators       | 1999 | international | thrombosis          | no           | single    | yes                  | non-inferior     | 7.2  | 6.151 | 1    | 1.14 |
| Vilas-Boas et al.                                                                          | 2014 | Brazil        | infectious diseases | yes          | composite | no                   | non-inferior     | 20   | 23    | 9    | 1.45 |
| International Joint Efficacy Comparison of Thrombolytics (INJECT)                          | 1995 | international | thrombosis          | no           | single    | yes                  | non-inferior     | 2.7  | 9.53  | 2.1  | 1.78 |
| Nitz et al.                                                                                | 2019 | Germany       | oncology            | no           | composite | yes                  | non-inferior     | 28.9 | 10.2  | 4.4  | 1.15 |
