# Supplementary material for: Testing for non-inferior mortality: a systematic review of non-inferiority margin sizes and trial characteristics
Source: PubMed Central journal article supplement — BMJ Open. 2021 Apr 20;11(4):e044480. doi: 10.1136/bmjopen-2020-044480 (PMC8061825; doi:10.1136/bmjopen-2020-044480), 2021-04-20

**Appendix C: Relationship between observed outcomes and estimated risks of outcome in control group**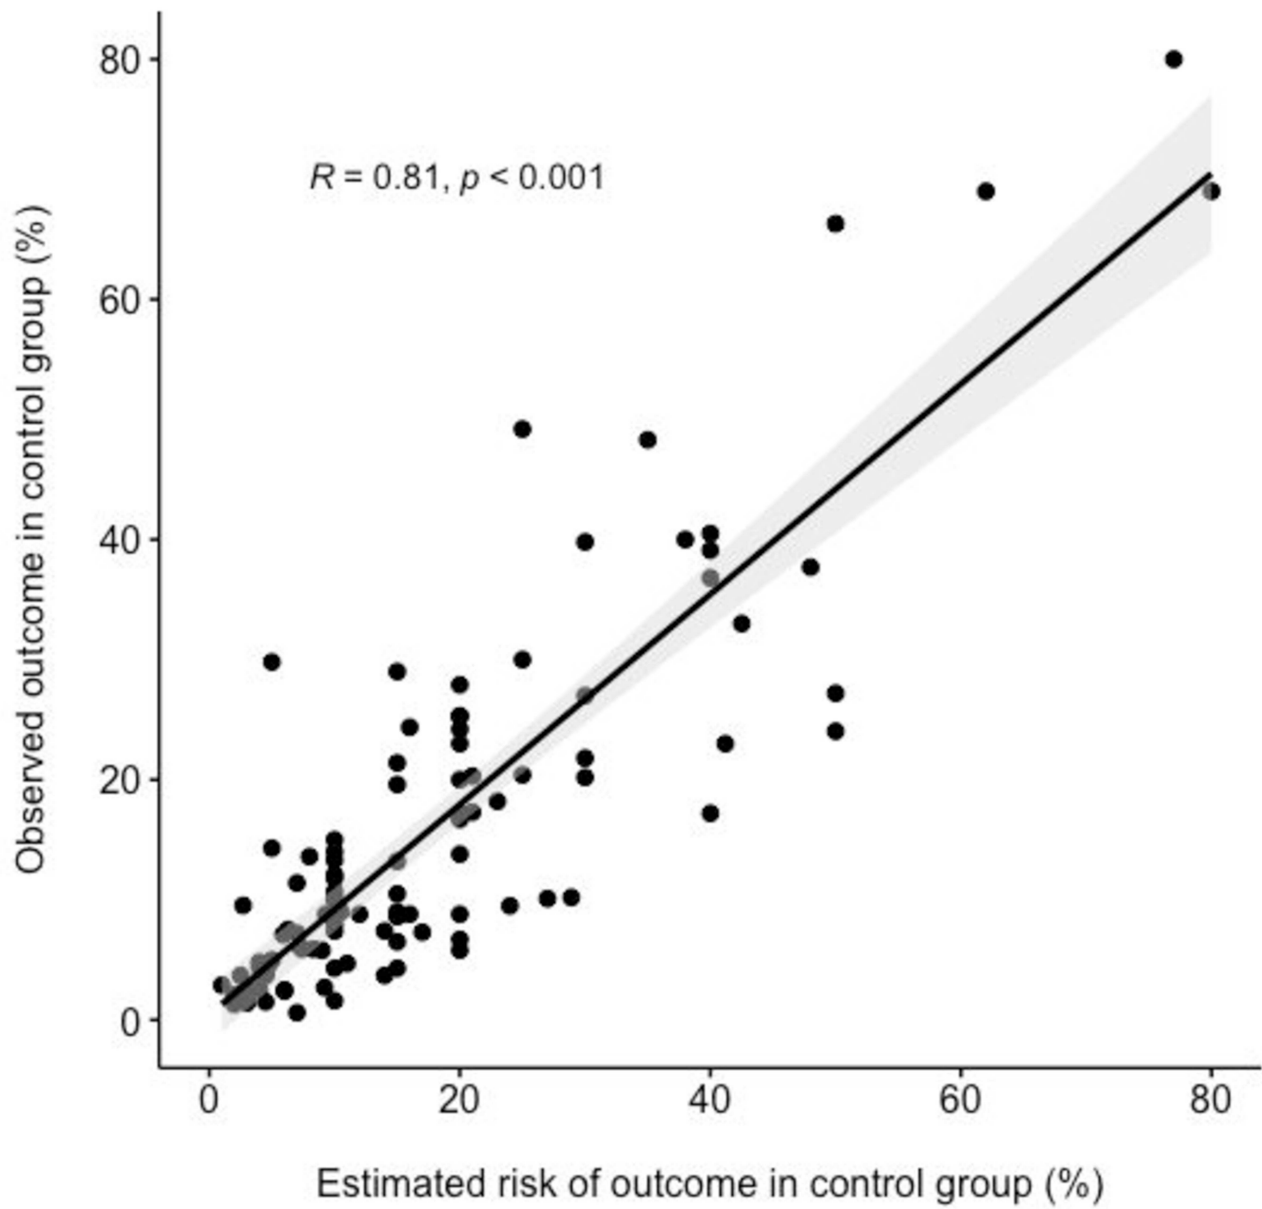

Supplement: bmjopen-2020-044480supp003.pdf [file bmjopen-2020-044480supp003.pdf]
